# Supplementary material
Source: PubMed Central journal article supplement (PMC8006600)
Supplement: NIHMS1678485-supplement-SI.pdf [file NIHMS1678485-supplement-SI.pdf]

## ***Supporting Information for:***

### **Singlet oxygen formation vs. photodissociation for light-responsive protic ruthenium anticancer compounds: The oxygenated substituent determines which pathway dominates**

*Fengrui Qu,<sup>a,‡</sup> Robert W. Lamb,<sup>b,‡</sup> Colin G. Cameron,<sup>c</sup> Seungjo Park,<sup>d</sup> Olaitan Oladipupo,<sup>a</sup> Jessica L. Gray,<sup>a</sup> Yifei Xu,<sup>a</sup> Houston D. Cole,<sup>c</sup> Marco Bonizzoni,<sup>a</sup> Yonghyun Kim,<sup>\*d</sup> Sherri A. McFarland,<sup>\*c</sup> Charles Edwin Webster,<sup>\*b</sup> Elizabeth T. Papish<sup>\*a</sup>*

<sup>a</sup>*Department of Chemistry and Biochemistry, The University of Alabama, Tuscaloosa, AL 35487, USA.*

<sup>b</sup>*Department of Chemistry, Mississippi State University, Mississippi State, MS 39762, USA.*

<sup>c</sup>*Department of Chemistry and Biochemistry, University of Texas Arlington, Arlington, TX 76019, USA.*

<sup>d</sup>*Department of Chemical and Biological Engineering, The University of Alabama, Tuscaloosa, AL 35487, USA.*

*‡These authors contributed equally.*

\*E-mail: [ykim@eng.ua.edu](mailto:ykim@eng.ua.edu) (YK).

\*E-mail: [sherri.mcfarland@uta.edu](mailto:sherri.mcfarland@uta.edu) (SAM).

\*E-mail: [ewebster@chemistry.msstate.edu](mailto:ewebster@chemistry.msstate.edu) (CEW).

\*E-mail: [etpapish@ua.edu](mailto:etpapish@ua.edu) (ETP).

## Table of Contents

|                                                                                                                        |        |
|------------------------------------------------------------------------------------------------------------------------|--------|
| Cellular Studies with <b>3<sub>A</sub></b>                                                                             | S3     |
| General Synthetic and Characterization Methods                                                                         | S5     |
| Typical Synthesis of the Deprotonated Complexes ( <b>X<sub>B</sub> = 1<sub>B</sub>, 2<sub>B</sub>, 3<sub>B</sub></b> ) | S5     |
| Characterization Data for <b>2<sub>B</sub></b> and <b>3<sub>B</sub></b>                                                | S6     |
| Singlet Oxygen Quantum Yield Measurements                                                                              | S10    |
| Computational Methods                                                                                                  | S11    |
| Comparison to X-Ray Structures                                                                                         | S12    |
| Relative Energies of Various Computed States                                                                           | S13    |
| State Assignments                                                                                                      | S17    |
| Simulated Ground State Absorption Spectra                                                                              | S24    |
| Phosphorescence Experiments                                                                                            | S26-28 |
| References                                                                                                             | S29    |
| Molecular Coordinates                                                                                                  | S31    |

## Cellular Studies with 3<sub>A</sub>

**Experimental Details for Cellular Studies** - Breast cancer cell lines MCF7 and MDA-MB-231 (ATCC, Manassas, VA) were cultured in Dulbecco's Modified Eagle's Medium (Gibco, Grand Island, NY) supplemented with 10% fetal bovine serum (Gibco) and 1X penicillin-streptomycin (Corning, Manassas, VA). Cells were treated with 5  $\mu\text{M}$  3<sub>A</sub> without (dark control) or with blue light irradiation as previously published (using Philips goLITE BLU with broad band blue light centered at 450 nm).<sup>1-2</sup> Singlet oxygen production in cells were measured using Singlet Oxygen Sensor Green (SOSG; Invitrogen, Carlsbad, CA) as previously published ( $n = 3$ ).<sup>3</sup> SOSG luminescence was visualized in using C2+ confocal microscope (Nikon). Late apoptosis was detected using Annexin V and propidium iodide (PI) (FITC Annexin V Apoptosis Kit I; BD Biosciences, San Jose, CA;  $n = 3$ ) according to manufacturer's protocol. Reactive oxygen species (ROS) production was measured using Total ROS Detection Kit according to manufacturer's protocol (Enzo Life Sciences, Farmingdale, NY;  $n = 3$ ). Total ROS in cells were measured after irradiation with blue light (sublethal dose). As positive control for ROS detection, cells were treated with 200  $\mu\text{M}$  pyocyanin for 20 min. SOSG, apoptosis, and total ROS were measured quantitatively in Accuri C6 flow cytometer (BD Biosciences). See Figures 1 and 2 in the main text and S1 and S2 below.



**Figure S1.** Apoptosis indicators in MDA-MB-231 as measured by Annexin V<sup>+</sup>/PI<sup>+</sup>. The control uses no ruthenium complex.



**Figure S2.** ROS indicators in MDA-MB-231. +ROS is the pyocyanin positive control as an ROS inducer. For both plots, *solid bars* indicate incubation with no ruthenium compound (control), positive control, or **3<sub>A</sub>** for 48 h in the *dark*. *Striped bars* indicate incubation followed by irradiation with *blue light*.

## General Synthetic and Characterization Methods

Complexes **1<sub>A</sub>**, **2<sub>A</sub>**, **3<sub>A</sub>**, **4** and **5** were prepared according to previously published procedures.<sup>1-2, 4</sup> NMR spectra were recorded in a Bruker AVANCE 360 (360 MHz, <sup>1</sup>H frequency) or AVANCE 500 (500MHz, <sup>1</sup>H frequency) NMR spectrometer. FT-IR spectra were recorded on a Bruker Alpha ATR-IR spectrophotometer. Mass spectra were obtained in a Waters AutoSpec-Ultima NT mass spectrometer or Waters Xero G2-XS QTOF. UV-Vis spectra were recorded with an Ocean Optics FLAME-CHEM-UV-VIS or a Perkin Elmer Lambda 35 instrument using a quartz cuvette of 1 cm path length under ambient atmosphere.

### Typical synthesis of the deprotonated complexes (**X<sub>B</sub>** = **1<sub>B</sub>**, **2<sub>B</sub>**, **3<sub>B</sub>**)

While protected from light, approximately 10-20 mg of the **X<sub>A</sub>** complex (**1<sub>A</sub>**, **2<sub>A</sub>**, or **3<sub>A</sub>**) was dissolved in a minimum amount of MeOH before adding an excess of NaOH (approximately 4-5 drops of 5M NaOH<sub>(aq)</sub>) until a color change from red-orange to darker purple was observed. The methanol solution was then recrystallized via vapor diffusion with diethyl ether to yield crystals of **X<sub>B</sub>**. The solid was collected by filtration and washed with diethyl ether before drying completely under vacuum. Typical yield was 90%. Purity and identity of the samples was confirmed by <sup>1</sup>H NMR, UV-Vis, ESI-MS, and IR.

### Characterization Data for 2<sub>B</sub> and 3<sub>B</sub>



**Figure S3.** Experimental (top) and simulated (bottom) ESI-MS data for **2<sub>B</sub>**. The ion shown is  $[\mathbf{2B} + \text{H}^+]^+ = [\text{C}_{34}\text{H}_{23}\text{N}_6\text{O}_2\text{Ru}]^+$ .

**UV-Vis Sample Preparation for 2<sub>B</sub>:** A sample (0.500 mg) of the isolated 2<sub>B</sub> was diluted with 5.00 mL MeOH for a concentration of 154  $\mu\text{M}$ . The molar absorptivity for 2<sub>B</sub> was measured at  $\epsilon_{363} = 12,200 \text{ Lmol}^{-1}\text{cm}^{-1}$  in MeOH. Therefore, as shown in Figure S4, with  $A_{363} = 1.884$  this complex is of similar purity to other samples made by us previously.



**Figure S4.** UV-Vis spectrum of 2<sub>B</sub> in MeOH.

## IR Spectroscopy



**Figure S5.** ATR IR spectrum of **2B**. The peak at 1630 cm<sup>-1</sup> shows the C=O bond of the deprotonated ligand. This peak is absent for **2A**.



**UV-Vis Sample Preparation for 3<sub>B</sub>:** A sample (0.500 mg) of the isolated 3<sub>B</sub> was diluted with 9.30 mL MeOH for a concentration of 70.3  $\mu\text{M}$ . The molar absorptivity was measured at  $\epsilon_{341} = 15,500 \text{ Lmol}^{-1}\text{cm}^{-1}$  in MeOH. Therefore, as shown in Figure S6, with  $A_{341} = 1.0787$  this complex is of similar purity to other samples made by us previously.



**Figure S6.** UV-Vis spectrum of 3<sub>B</sub> in MeOH.

## Singlet Oxygen Quantum Yield Measurements

Singlet oxygen quantum yields ( $\Phi_{\Delta}$ ) were measured by the emissive actinometric method that has worked well in the past with other polypyridyl-type Ru(II) complexes.<sup>5-7</sup> A PTI Quantamaster spectrometer equipped with a Hamamatsu R5509-42 near-infrared detector (cooled to  $-80$  °C) was used to measure the intensity of the  $^1\text{O}_2$  emission that occurs at around 1276 nm. The quantum yield was calculated by the relative actinometric method in Equation 1, using  $[\text{Ru}(\text{bpy})_3](\text{PF}_6)_2$  as the standard ( $\Phi_{\Delta} = 0.56$  in aerated MeCN)<sup>8</sup>

$$\Phi_{\Delta} = \Phi_{\Delta,S} \left( \frac{I}{I_S} \right) \left( \frac{A_S}{A} \right) \left( \frac{\eta^2}{\eta_S^2} \right) \quad (1)$$

where  $I$  is the emission integration,  $A$  is the absorption of the solution at the excitation wavelength, and  $\eta$  is the refractive index of the solvent. The standard is indicated by the subscript  $S$ . The samples were measured in deuterated methanol solution, and the standard in acetonitrile. The excitation wavelength was the longest in the excitation spectrum to maximize the emission at 1276 nm. The emission spectrum was recorded between 1200–1350 nm with a 1000 nm long pass filter, and internally corrected for variations in the illumination source and detector output. The spectra were signal averaged over multiple scans to reduce noise and were baseline corrected.

## Computational Methods

All computations were carried out using Revision C.01 of the Gaussian 16<sup>9</sup> suite of programs with default ( $10^{-8}$ ) SCF convergence criteria. Either the PBE0 functional<sup>10</sup> in conjunction with Grimme's D3 empirical dispersion<sup>11</sup> and Becke-Johnson damping<sup>12</sup> [EMP=GD3BJ] or the B3LYP functional<sup>13-14</sup> were used for all computations. The basis set combinations are defined as follows: BS1 is the Couty and Hall modification<sup>15</sup> (mod-LANL2DZ) to the valence basis set of LANL2DZ+ECP combination for Ru<sup>16</sup> and for C, H, N, and O the 6-31G(d')<sup>17-19</sup> basis sets (the 6-31G(d') basis sets have the d polarization functions taken from the 6-311G(d)<sup>20</sup> basis sets rather than the default value of 0.8<sup>21</sup> for C, N, and O); BS2 is the SDD triple- $\zeta$  quality Stuttgart valence (2f,g) basis set with the Stuttgart/Köln quasi-relativistic small core ECP (SDD(2f,g)) for Ru,<sup>22-23</sup> and the jul-cc-pVDZ basis sets for C, H, N, and O<sup>24-25</sup> (the jul- augmentation scheme uses the corresponding aug-cc-pVXZ basis but removes the diffuse functions from H and He). Spherical harmonic d functions were used throughout; *i.e.* there are 5 angular basis functions per *d* function. Excited state optimizations were carried out as variational triplets, <sup>1</sup>TD-DFT, and <sup>3</sup>TD-DFT. Optimizations with TD-DFT were carried out using analytical gradients and the first 3 excitations were solved iteratively [TD(SINGLET,ROOT=1) or TD(TRIPLET,ROOT=1)]. All stationary points were confirmed to be minima by an analytical frequency computation at the same level of theory. Free energies used for comparisons were obtained directly from optimizations with either PBE0-D3BJ/BS1 or B3LYP/BS1. Free energies from B3LYP/BS2 single-point computations on B3LYP/BS1 (B3LYP/BS2//B3LYP-BS1) were obtained by applying the thermodynamic corrections from the BS1 geometries to the electronic energies from the BS2. UV-VIS absorption spectra were simulated using TD-DFT<sup>26</sup> single points on the PBE0-D3BJ/BS1 optimized geometries (TD-DFT//PBE0-D3BJ/BS1). To simulate the absorption spectra, the first 30 vertical excitations were solved iteratively [TD(ROOT=1,NSTATES=30)]. Simulated absorption spectra were generated using an in-house Fortran program by convoluting<sup>27</sup> the computed excitation energies and oscillator strengths with a Gaussian line-shape and a broadening of 20 nm. Orbital images were generated in Chemcraft<sup>28</sup> using an isovalue of 0.02.

## Comparison to X-Ray Structures



**Figure S7:** Overlay of experimental crystal structures<sup>2</sup> (green) to PBE0-D3BJ/BS1 optimized geometries (“normal” colors). Structures are matched to the central Ru and the six coordinated N atoms. Complex **2<sub>A</sub>** is on the left, **2<sub>B</sub>** is in the middle, and **3<sub>A</sub>** is on the right.

Both the crystal structure and DFT optimized geometries have distortions in the ligands. These distortions were previously believed to be perhaps influenced to crystal packing forces. However, observing similar distortions in the DFT optimized geometries indicates that these distortions are instead features of these complexes. It should be noted that the crystal structure and DFT geometries do not overlap incredibly well against all heavy atoms see Table S1, indicating that while these distortions are inherently present, crystal packing likely does have an effect.

**Table S1:** RMSDs (Å) of the DFT optimized geometries from the crystal structure

|                      | All Heavy Atoms | Ru-N <sub>6</sub> |
|----------------------|-----------------|-------------------|
| <b>2<sub>A</sub></b> | 0.192           | 0.034             |
| <b>2<sub>B</sub></b> | 0.357           | 0.058             |
| <b>3<sub>A</sub></b> | 0.354           | 0.060             |

## Relative Energies of Various Computed States



**Figure S8:** Relative free energies (eV) of the Ru complexes studied from PBE0-D3BJ/BS1.



**Figure S9:** Relative free energies (eV) of the Ru complexes studied from B3LYP/BS1. MC states were not computed for **2B** and **3B** because other states aligned well with the trends from PBE0-D3BJ/BS1.



**Figure S10:** Relative free energies (eV) of the Ru complexes studied from B3LYP/BS2//B3LYP/BS1. Thermodynamic corrections from the B3LYP/BS1 optimizations were applied to the electronic energy of the B3LYP/BS2//B3LYP/BS1 single-point computations. MC states were not computed for **2B** and **3B** because other states aligned well with the trends from PBE0-D3BJ/BS1.

**Table S2:** Absolute (Hartrees) and relative (eV) electronic ( $E_{el}$ ) and free (G) energies for the ground and various excited states of each complex from PBE0-D3BJ/BS1.

| File Designation    | Spin State                        | Primary Character | $E_{el}$    | G           | $\Delta E_{el}$ | $\Delta G$ |
|---------------------|-----------------------------------|-------------------|-------------|-------------|-----------------|------------|
| <b>2a</b>           |                                   |                   |             |             |                 |            |
| td-sing--vsing-1001 | <sup>1</sup> TD- <sup>1</sup> DFT | <sup>1</sup> MLCT | -1880.60371 | -1880.14440 | 2.46            | 2.39       |
| td-trip--vsing-1001 | <sup>3</sup> TD- <sup>1</sup> DFT | <sup>3</sup> MLCT | -1880.61288 | -1880.15536 | 2.21            | 2.10       |
| gs-triplet          | <sup>3</sup> DFT                  | <sup>3</sup> MC   | -1880.62542 | -1880.16973 | 1.87            | 1.70       |
| gs-singlet          | <sup>1</sup> DFT                  | <sup>1</sup> GS   | -1880.69421 | -1880.23242 | 0.00            | 0.00       |
| <b>2b</b>           |                                   |                   |             |             |                 |            |
| td-sing--vsing-1001 | <sup>1</sup> TD- <sup>1</sup> DFT | <sup>1</sup> LLCT | -1879.86909 | -1879.44035 | 1.49            | 1.34       |
| td-sing--vtrip-1001 | <sup>1</sup> TD- <sup>3</sup> DFT | <sup>3</sup> LMCT | -1879.86733 | -1879.43641 | 1.54            | 1.45       |
| td-trip--vsing-1001 | <sup>3</sup> TD- <sup>1</sup> DFT | <sup>3</sup> MLCT | -1879.87549 | -1879.44459 | 1.31            | 1.22       |
| td-trip--vtrip-1001 | <sup>3</sup> TD- <sup>3</sup> DFT | <sup>3</sup> LMCT | -1879.86653 | -1879.43645 | 1.56            | 1.44       |
| gs-triplet-mc       | <sup>3</sup> DFT                  | <sup>3</sup> MC   | -1879.84756 | -1879.41960 | 2.08            | 1.90       |
| gs-triplet          | <sup>3</sup> DFT                  | <sup>3</sup> MLCT | -1879.86787 | -1879.43810 | 1.52            | 1.40       |
| gs-singlet          | <sup>1</sup> DFT                  | <sup>1</sup> GS   | -1879.92383 | -1879.48958 | 0.00            | 0.00       |
| <b>3a</b>           |                                   |                   |             |             |                 |            |
| td-sing--vsing-1001 | <sup>1</sup> TD- <sup>1</sup> DFT | <sup>1</sup> MLCT | -2335.85023 | -2335.30713 | 2.39            | 2.32       |
| td-trip--vsing-1001 | <sup>3</sup> TD- <sup>1</sup> DFT | <sup>3</sup> MLCT | -2335.85877 | -2335.31605 | 2.16            | 2.08       |
| gs-triplet          | <sup>3</sup> DFT                  | <sup>3</sup> MC   | -2335.86954 | -2335.32959 | 1.87            | 1.71       |
| gs-singlet          | <sup>1</sup> DFT                  | <sup>1</sup> GS   | -2335.93817 | -2335.39234 | 0.00            | 0.00       |
| <b>3b</b>           |                                   |                   |             |             |                 |            |
| td-sing--vsing-1001 | <sup>1</sup> TD- <sup>1</sup> DFT | <sup>1</sup> LLCT | -2335.09847 | -2334.58504 | 1.52            | 1.38       |
| td-sing--vtrip-1001 | <sup>1</sup> TD- <sup>3</sup> DFT | <sup>3</sup> MLCT | -2335.09734 | -2334.58143 | 1.55            | 1.48       |
| td-trip--vsing-1001 | <sup>3</sup> TD- <sup>1</sup> DFT | <sup>3</sup> MLCT | -2335.10498 | -2334.58915 | 1.34            | 1.27       |
| td-trip--vtrip-1001 | <sup>3</sup> TD- <sup>3</sup> DFT | <sup>3</sup> LLCT | -2335.09665 | -2334.58245 | 1.57            | 1.45       |
| gs-triplet-mc       | <sup>3</sup> DFT                  | <sup>3</sup> MC   | -2335.07863 | -2334.56613 | 2.06            | 1.90       |
| gs-triplet          | <sup>3</sup> DFT                  | <sup>3</sup> MLCT | -2335.09798 | -2334.58361 | 1.54            | 1.42       |
| gs-singlet          | <sup>1</sup> DFT                  | <sup>1</sup> GS   | -2335.15435 | -2334.63586 | 0.00            | 0.00       |

**Table S3:** Absolute (Hartrees) electronic ( $E_{el}$ ) and free (G) energies and relative free energies (eV) for the ground and various excited states of each complex from B3LYP/BS1 and B3LYP/BS2//B3LYP/BS1.

| File Designation    | Spin State                        | Primary Character | BS1         |             |            | BS2//BS1    |             |            |
|---------------------|-----------------------------------|-------------------|-------------|-------------|------------|-------------|-------------|------------|
|                     |                                   |                   | $E_{el}$    | G           | $\Delta G$ | $E_{el}$    | G           | $\Delta G$ |
| <b>2a</b>           |                                   |                   |             |             |            |             |             |            |
| td-sing--vsing-1001 | <sup>1</sup> TD- <sup>1</sup> DFT | <sup>1</sup> MLCT | -1880.60371 | -1880.14440 | 2.30       | -1883.82757 | -1883.37350 | 2.17       |
| td-trip--vsing-1001 | <sup>3</sup> TD- <sup>1</sup> DFT | <sup>3</sup> MLCT | -1880.61288 | -1880.15536 | 2.09       | -1883.83342 | -1883.38128 | 1.95       |
| gs-triplet          | <sup>3</sup> DFT                  | <sup>3</sup> MC   | -1880.62542 | -1880.16973 | 1.60       | -1883.83735 | -1883.38841 | 1.76       |
| gs-singlet          | <sup>1</sup> DFT                  | <sup>1</sup> GS   | -1880.69421 | -1880.23242 | 0.00       | -1883.90826 | -1883.45307 | 0.00       |
| <b>2b</b>           |                                   |                   |             |             |            |             |             |            |
| td-sing--vsing-1001 | <sup>1</sup> TD- <sup>1</sup> DFT | <sup>1</sup> LLCT | -1879.86909 | -1879.44035 | 1.11       | -1883.09450 | -1882.67112 | 1.26       |
| td-sing--vtrip-1001 | <sup>1</sup> TD- <sup>3</sup> DFT | <sup>3</sup> LMCT | -1879.86733 | -1879.43641 | 1.36       | -1883.08536 | -1882.66158 | 1.52       |
| td-trip--vsing-1001 | <sup>3</sup> TD- <sup>1</sup> DFT | <sup>3</sup> MLCT | -1879.87549 | -1879.44459 | 1.09       | -1883.09678 | -1882.67273 | 1.22       |
| td-trip--vtrip-1001 | <sup>3</sup> TD- <sup>3</sup> DFT | <sup>3</sup> LMCT | -1879.86653 | -1879.43645 | 1.39       | -1883.08686 | -1882.66274 | 1.49       |
| gs-triplet          | <sup>3</sup> DFT                  | <sup>3</sup> MLCT | -1879.86787 | -1879.43810 | 1.38       | -1883.08803 | -1882.66487 | 1.43       |
| gs-singlet          | <sup>1</sup> DFT                  | <sup>1</sup> GS   | -1879.92383 | -1879.48958 | 0.00       | -1883.14555 | -1882.71744 | 0.00       |
| <b>3a</b>           |                                   |                   |             |             |            |             |             |            |
| td-sing--vsing-1001 | <sup>1</sup> TD- <sup>1</sup> DFT | <sup>1</sup> MLCT | -2335.85023 | -2335.30713 | 2.22       | -2339.59777 | -2339.06127 | 2.08       |
| td-trip--vsing-1001 | <sup>3</sup> TD- <sup>1</sup> DFT | <sup>3</sup> MLCT | -2335.85877 | -2335.31605 | 2.10       | -2339.60293 | -2339.06572 | 1.96       |
| gs-triplet          | <sup>3</sup> DFT                  | <sup>3</sup> MC   | -2335.86954 | -2335.32959 | 1.60       | -2339.60486 | -2339.07329 | 1.76       |
| gs-singlet          | <sup>1</sup> DFT                  | <sup>1</sup> GS   | -2335.93817 | -2335.39234 | 0.00       | -2339.67560 | -2339.13784 | 0.00       |
| <b>3b</b>           |                                   |                   |             |             |            |             |             |            |
| td-sing--vsing-1001 | <sup>1</sup> TD- <sup>1</sup> DFT | <sup>1</sup> LLCT | -2335.09847 | -2334.58504 | 1.15       | -2338.84676 | -2338.34011 | 1.30       |
| td-sing--vtrip-1001 | <sup>1</sup> TD- <sup>3</sup> DFT | <sup>3</sup> MLCT | -2335.09734 | -2334.58143 | 1.41       | -2338.84309 | -2338.33564 | 1.42       |
| td-trip--vsing-1001 | <sup>3</sup> TD- <sup>1</sup> DFT | <sup>3</sup> MLCT | -2335.10498 | -2334.58915 | 1.13       | -2338.84938 | -2338.34192 | 1.25       |
| td-trip--vtrip-1001 | <sup>3</sup> TD- <sup>3</sup> DFT | <sup>3</sup> LLCT | -2335.09665 | -2334.58245 | 1.41       | -2338.84309 | -2338.33564 | 1.42       |
| gs-triplet          | <sup>3</sup> DFT                  | <sup>3</sup> MLCT | -2335.09798 | -2334.58361 | 1.40       | -2338.84638 | -2338.33992 | 1.30       |
| gs-singlet          | <sup>1</sup> DFT                  | <sup>1</sup> GS   | -2335.15435 | -2334.63586 | 0.00       | -2338.89897 | -2338.38779 | 0.00       |



## State Assignments

Character of the various excited states was determined by examining either the HOMO or the natural transition orbitals (NTOs) for the lowest excitation (root 1). For DFT optimized geometries, examining the nature of the HOMO is a good indication as to the state. For TD-DFT optimized geometries, each was optimized with respect to the lowest excitation (root 1). Therefore, examining the NTOs for this excitation will be a good indication as to the nature of the optimized state. The orbitals used for each assignment are shown below.

**Complex 2<sub>A</sub>**  
**td-sing--vsing-1001**



**td-trip--vsing-1001**



**gs-triplet**



**gs-singlet**



**Complex 2<sub>B</sub>**  
**td-sing--vsing-1001**



**td-sing--vtrip-1001**



**td-trip--vsing-1001**



**td-trip--vtrip-1001**



**gs-triplet**



HOMO

**gs-triplet-mc**



HOMO

**gs-singlet**



HOMO

**Complex 3<sub>A</sub>**  
**td-sing--vsing-1001**



**td-trip--vsing-1001**



**gs-triplet**



**gs-singlet**



**Complex 3<sub>B</sub>**  
**td-sing--vsing-1001**



**td-sing--vtrip-1001**



**td-trip--vsing-1001**



**td-trip--vtrip-1001**



**gs-triplet**



HOMO

**gs-triplet-mc**



HOMO

**gs-singlet**



HOMO

## Simulated Ground State Absorption Spectra



**Figure S11:** Simulated absorption spectra (black curve) with computed excitations (red sticks) of complex **2A** (left) and **2B** (right) PBE0-D3BJ/BS1.



**Figure S12:** Simulated absorption spectra (black curve) with computed excitations (red sticks) of complex **3A** (left) and **3B** (right) PBE0-D3BJ/BS1.





**Figure S13:** Simulated absorption spectra (black curve) with experimental absorption (red curve) of complex **2<sub>A</sub>** (left) and **2<sub>B</sub>** (right) PBE0-D3BJ/BS1.



**Figure S14:** Simulated absorption spectra (black curve) with experimental absorption (red curve) of complex **3<sub>A</sub>** (left) and **3<sub>B</sub>** (right) PBE0-D3BJ/BS1.

## Phosphorescence Experiments

Note that due to logistical constraints Figure S15 was obtained on a fluorimeter in Prof. McFarland's lab at University of Texas at Arlington, and Figures S16-S19 were obtained on a fluorimeter in Prof. Bonizzoni's lab at the University of Alabama. This explains the differences in the appearance of the spectra, specifically that Figure S15 shows emission into the near IR at 1100 nm. A variety of solvents were used with complexes **2<sub>A</sub>** and **2<sub>B</sub>** to demonstrate that each form of the complex shows similar luminescence wavelengths across different solvents (see Figures S16-18, Table S4). For **2<sub>A</sub>**, the luminescence wavelengths are 610 to 628 nm, and for **2<sub>B</sub>**, they are 696 to 710 nm. For **1<sub>A</sub>/1<sub>B</sub>** and **3<sub>A</sub>/3<sub>B</sub>** the solvent which gave the best spectra are shown in Figures S15 and S19 which were taken in aqueous and acetonitrile solution, respectively. Table S4 shows that the A forms consistently shift to higher wavelength upon deprotonation to the B forms for **1-3**.



**Figure S15:** Phosphorescence (normalized emission) of **1<sub>A</sub>** and **1<sub>B</sub>** in water.



**Figure S16:** Phosphorescence (normalized emission) of **2<sub>A</sub>** and **2<sub>B</sub>** in water.



**Figure S17:** Phosphorescence (normalized emission) of **2<sub>A</sub>** and **2<sub>B</sub>** in methanol.



**Figure S18:** Phosphorescence (normalized emission) of **2<sub>A</sub>** and **2<sub>B</sub>** in acetonitrile.



**Figure S19:** Phosphorescence (normalized emission) of **3<sub>A</sub>** and **3<sub>B</sub>** in acetonitrile. **3<sub>B</sub>** (as prepared by *in situ* deprotonation) appears to be a mixture of **3<sub>A</sub>** and **3<sub>B</sub>**.

**Table S4:** Emission wavelength (maxima) of each compound in each solvent. Excitation: 470 nm.

| Solvent      | Compound (acidic forms) | Emission wavelength (nm) | Compound (basic forms) | Emission wavelength (nm) |
|--------------|-------------------------|--------------------------|------------------------|--------------------------|
| Water        | <b>1<sub>A</sub></b>    | 630                      | <b>1<sub>B</sub></b>   | 727                      |
|              | <b>2<sub>A</sub></b>    | 628                      | <b>2<sub>B</sub></b>   | 696                      |
| Acetonitrile | <b>2<sub>A</sub></b>    | 612                      | <b>2<sub>B</sub></b>   | 710                      |
|              | <b>3<sub>A</sub></b>    | 610                      | <b>3<sub>B</sub></b>   | 734                      |
| Methanol     | <b>2<sub>A</sub></b>    | 610                      | <b>2<sub>B</sub></b>   | 698                      |

## References

1. Qu, F.; Martinez, K.; Arcidiacono, A. M.; Park, S.; Zeller, M.; Schmehl, R. H.; Paul, J. J.; Kim, Y.; Papish, E. T., Sterically demanding methoxy and methyl groups in ruthenium complexes lead to enhanced quantum yields for blue light triggered photodissociation. *Dalton Trans.* **2018**, 47, 15685-15693.
2. Qu, F.; Park, S.; Martinez, K.; Gray, J. L.; Thowfeik, F. S.; Lundeen, J. A.; Kuhn, A. E.; Charboneau, D. J.; Gerlach, D. L.; Lockart, M. M.; Law, J. A.; Jernigan, K. L.; Chambers, N.; Zeller, M.; Piro, N. A.; Kassel, W. S.; Schmehl, R. H.; Paul, J. J.; Merino, E. J.; Kim, Y.; Papish, E. T., Ruthenium Complexes are pH-Activated Metallo Prodrugs (pHAMPs) with Light-Triggered Selective Toxicity Toward Cancer Cells. *Inorg. Chem.* **2017**, 56, 7519-7532.
3. Prasad, A.; Sedlářová, M.; Pospíšil, P., Singlet oxygen imaging using fluorescent probe Singlet Oxygen Sensor Green in photosynthetic organisms. *Sci. Rep.* **2018**, 8, 13685.
4. Hufziger, K. T.; Thowfeik, F. S.; Charboneau, D. J.; Nieto, I.; Dougherty, W. G.; Kassel, W. S.; Dudley, T. J.; Merino, E. J.; Papish, E. T.; Paul, J. J., Ruthenium Dihydroxybipyridine Complexes are Tumor Activated Prodrugs due to Low pH and Blue Light Induced Ligand Release. *J. Inorg. Biochem.* **2014**, 130, 103-111.
5. Roque III, J.; Havrylyuk, D.; Barrett, P. C.; Sainuddin, T.; McCain, J.; Colón, K.; Sparks, W. T.; Bradner, E.; Monroe, S.; Heidary, D.; Cameron, C. G.; Glazer, E. C.; McFarland, S. A., Strained, Photoejecting Ru(II) Complexes that are Cytotoxic Under Hypoxic Conditions. *Photochem. Photobiol.* **2020**, 96, 327-339.
6. Monroe, S.; Cameron, C. G.; Zhu, X.; Colón, K. L.; Yin, H.; Sainuddin, T.; Hetu, M.; Pinto, M.; Fuller, A.; Bennett, L.; Roque III, J.; Sun, W.; McFarland, S. A., Synthesis, Characterization and Photobiological Studies of Ru(II) Dyads Derived from  $\alpha$ -Oligothiophene Derivatives of 1,10-Phenanthroline. *Photochem. Photobiol.* **2019**, 95, 267-279.
7. McCain, J.; Colón, K. L.; Barrett, P. C.; Monroe, S. M. A.; Sainuddin, T.; Roque III, J.; Pinto, M.; Yin, H.; Cameron, C. G.; McFarland, S. A., Photophysical Properties and Photobiological Activities of Ruthenium(II) Complexes Bearing  $\pi$ -Expansive Cyclometalating Ligands with Thienyl Groups. *Inorg. Chem.* **2019**, 58, 10778-10790.
8. DeRosa, M. C.; Crutchley, R. J., Photosensitized singlet oxygen and its applications. *Coord. Chem. Rev.* **2002**, 233-234, 351-371.
9. Frisch, M. J. T., G. W.; Schlegel, H. B.; Scuseria, G. E.; Robb, M. A.; Cheeseman, J. R.; Scalmani, G.; Barone, V.; Petersson, G. A.; Nakatsuji, H.; Li, X.; Caricato, M.; Marenich, A. V.; Bloino, J.; Janesko, B. G.; Gomperts, R.; Mennucci, B.; Hratchian, H. P.; Ortiz, J. V.; Izmaylov, A. F.; Sonnenberg, J. L.; Williams-Young, D.; Ding, F.; Lipparini, F.; Egidi, F.; Goings, J.; Peng, B.; Petrone, A.; Henderson, T.; Ranasinghe, D.; Zakrzewski, V. G.; Gao, J.; Rega, N.; Zheng, G.; Liang, W.; Hada, M.; Ehara, M.; Toyota, K.; Fukuda, R.; Hasegawa, J.; Ishida, M.; Nakajima, T.; Honda, Y.; Kitao, O.; Nakai, H.; Vreven, T.; Throssell, K.; Montgomery, J. A., Jr.; Peralta, J. E.; Ogliaro, F.; Bearpark, M. J.; Heyd, J. J.; Brothers, E. N.; Kudin, K. N.; Staroverov, V. N.; Keith, T. A.; Kobayashi, R.; Normand, J.; Raghavachari, K.; Rendell, A. P.; Burant, J. C.; Iyengar, S. S.; Tomasi, J.; Cossi, M.; Millam, J. M.; Klene, M.; Adamo, C.; Cammi, R.; Ochterski, J. W.; Martin, R. L.; Morokuma, K.; Farkas, O.; Foresman, J. B.; Fox, D. J. *Gaussian 16 C.01*, Gaussian, Inc.: Wallingford, CT, USA, 2016.
10. Adamo, C.; Barone, V., Toward reliable density functional methods without adjustable parameters: The PBE0 model. *J. Chem. Phys.* **1999**, 110, 6158-6170.

11. Stefan, G., Semiempirical GGA-type density functional constructed with a long-range dispersion correction. *J. Comput. Chem.* **2006**, *27*, 1787-1799.
12. Grimme, S.; Ehrlich, S.; Goerigk, L., Effect of the damping function in dispersion corrected density functional theory. *J. Comput. Chem.* **2011**, *32*, 1456-1465.
13. Becke, A. D., Density-Functional Thermochemistry, III. The Role of Exact Exchange. *J. Chem. Phys.* **1993**, *98*, 5648-5652.
14. Lee, C.; Yang, W.; Parr, R. G., Development of the Colle-Salvetti Correlation-Energy Formula into a Functional of the Electron Density. *Phys. Rev. B* **1988**, *37*, 785-789.
15. Couty, M.; Hall, M. B., Basis sets for transition metals: Optimized outer p functions. *J. Comput. Chem.* **1996**, *17*, 1359-1370.
16. Hay, P. J.; Wadt, W. R., Ab initio effective core potentials for molecular calculations. Potentials for K to Au including the outermost core orbitals. *J. Chem. Phys.* **1985**, *82*, 299-310.
17. Hehre, W. J.; Ditchfield, R.; Pople, J. A., Self-Consistent Molecular Orbital Methods. XII. Further Extensions of Gaussian-Type Basis Sets for Use in Molecular Orbital Studies of Organic Molecules. *J. Chem. Phys.* **1972**, *56* 2257-2261.
18. Hariharan, P. C.; Pople, J. A., The influence of polarization functions on molecular orbital hydrogenation energies. *Theor. Chim. Acta* **1973**, *28*, 213-222.
19. Petersson, G. A.; Al-Laham, M. A., A complete basis set model chemistry. II. Open-shell systems and the total energies of the first-row atoms. *J. Chem. Phys.* **1991**, *94*, 6081-6090.
20. McLean, A. D.; Chandler, G. S., Contracted Gaussian basis sets for molecular calculations. I. Second row atoms, Z=11-18. *J. Chem. Phys.* **1980**, *72*, 5639-5648.
21. Petersson, G. A.; Al-Laham, M. A., A complete basis set model chemistry. II. Open-shell systems and the total energies of the first-row atoms. *J. Chem. Phys.* **1991**, *94*, 6081-6090.
22. Andrae, D.; Häußermann, U.; Dolg, M.; Stoll, H.; Preuß, H., Energy-adjusted ab initio pseudopotentials for the second and third row transition elements. *Theor. Chim. Acta* **1990**, *77*, 123-141.
23. Martin, J. M. L.; Sundermann, A., Correlation consistent valence basis sets for use with the Stuttgart-Dresden-Bonn relativistic effective core potentials: The atoms Ga-Kr and In-Xe. *J. Chem. Phys.* **2001**, *114*, 3408-3420.
24. Papajak, E.; Zheng, J.; Xu, X.; Leverentz, H. R.; Truhlar, D. G., Perspectives on Basis Sets Beautiful: Seasonal Plantings of Diffuse Basis Functions. *J. Chem. Theory Comput.* **2011**, *7*, 3027-3034.
25. Kendall, R. A.; Jr., T. H. D.; Harrison, R. J., Electron affinities of the first-row atoms revisited. Systematic basis sets and wave functions. *J. Chem. Phys.* **1992**, *96*, 6796-6806.
26. Marques, M. A. L.; Gross, E. K. U., Time-Dependent Density Functional Theory. *Annu. Rev. Phys. Chem.* **2004**, *55*, 427-455.
27. Press, W. H., *Numerical recipes in FORTRAN : the art of scientific computing*. 2nd ed.; Cambridge University Press: Cambridge England ; New York, NY, USA, 1992; p 963.
28. Chemcraft - graphical software for visualization of quantum chemistry computations. <http://www.chemcraftprog.com>.

## Molecular Coordinates

pbe0-d3bj-bs1-2a--td-sing--vsing-1001

|    |           |           |           |
|----|-----------|-----------|-----------|
| Ru | -0.000032 | 0.187524  | 0.000051  |
| O  | -2.026814 | 0.512697  | 2.475733  |
| H  | -2.657898 | 0.578358  | 3.202542  |
| O  | 2.027002  | 0.512673  | -2.475104 |
| H  | 2.658175  | 0.578271  | -3.201840 |
| N  | -0.839130 | 1.802974  | 1.045204  |
| N  | 0.838772  | 1.803004  | -1.045157 |
| N  | -1.764928 | 0.162950  | -1.091843 |
| N  | -1.006073 | -1.417039 | 0.902120  |
| N  | 1.006365  | -1.416754 | -0.902139 |
| N  | 1.764870  | 0.163266  | 1.091933  |
| C  | -1.729445 | 1.754499  | 2.048951  |
| C  | -2.292138 | 2.877291  | 2.629909  |
| H  | -2.990300 | 2.779622  | 3.456226  |
| C  | -1.926788 | 4.136515  | 2.118225  |
| H  | -2.360523 | 5.038443  | 2.541225  |
| C  | -1.029665 | 4.220157  | 1.082564  |
| H  | -0.762740 | 5.187804  | 0.674502  |
| C  | -0.467732 | 3.043755  | 0.533179  |
| C  | 0.466980  | 3.043780  | -0.533426 |
| C  | 1.028589  | 4.220216  | -1.083070 |
| H  | 0.761351  | 5.187883  | -0.675259 |
| C  | 1.925823  | 4.136587  | -2.118643 |
| H  | 2.359322  | 5.038541  | -2.541827 |
| C  | 2.291628  | 2.877345  | -2.629964 |
| H  | 2.989931  | 2.779677  | -3.456163 |
| C  | 1.729210  | 1.754532  | -2.048776 |
| C  | -2.120098 | 1.012428  | -2.051237 |
| H  | -1.396331 | 1.781224  | -2.303776 |
| C  | -3.357962 | 0.915053  | -2.701822 |
| H  | -3.602765 | 1.627780  | -3.483499 |
| C  | -4.243849 | -0.081628 | -2.339994 |
| H  | -5.208334 | -0.172535 | -2.835017 |
| C  | -3.895273 | -0.984141 | -1.313364 |
| C  | -2.634046 | -0.811533 | -0.711822 |
| C  | -2.221190 | -1.664046 | 0.351475  |
| C  | -3.064570 | -2.702579 | 0.791804  |
| C  | -2.590102 | -3.509167 | 1.846866  |
| H  | -3.203841 | -4.324525 | 2.223600  |
| C  | -1.347398 | -3.251967 | 2.390766  |
| H  | -0.954572 | -3.853732 | 3.204886  |
| C  | -0.579013 | -2.190994 | 1.888864  |
| H  | 0.396276  | -1.954610 | 2.304921  |
| C  | -4.738846 | -2.045949 | -0.850164 |
| H  | -5.710995 | -2.180231 | -1.318227 |
| C  | -4.338143 | -2.872621 | 0.156996  |
| H  | -4.986759 | -3.675315 | 0.499461  |
| C  | 0.579488  | -2.190721 | -1.888954 |
| H  | -0.395843 | -1.954510 | -2.305012 |
| C  | 1.348099  | -3.251503 | -2.390915 |
| H  | 0.955414  | -3.853288 | -3.205087 |
| C  | 2.590845  | -3.508486 | -1.847008 |
| H  | 3.204759  | -4.323691 | -2.223789 |

|   |          |           |           |
|---|----------|-----------|-----------|
| C | 3.065131 | -2.701870 | -0.791885 |
| C | 2.221532 | -1.663540 | -0.351500 |
| C | 2.634196 | -0.811011 | 0.711859  |
| C | 3.895455 | -0.983390 | 1.313399  |
| C | 4.243837 | -0.080860 | 2.340080  |
| H | 5.208338 | -0.171593 | 2.835103  |
| C | 3.357743 | 0.915621  | 2.701952  |
| H | 3.602396 | 1.628360  | 3.483665  |
| C | 2.119861 | 1.012772  | 2.051368  |
| H | 1.395933 | 1.781406  | 2.303941  |
| C | 4.338731 | -2.871689 | -0.157072 |
| H | 4.987517 | -3.674228 | -0.499579 |
| C | 4.739253 | -2.044995 | 0.850142  |
| H | 5.711424 | -2.179103 | 1.318206  |

total energy= -1880.60370608

zpe= -1880.080939

th energy= -1880.048543

th enthalpy= -1880.047599

free energy= -1880.144396

pbe0-d3bj-bs1-2a--td-trip--vsing-1001

|    |           |           |           |
|----|-----------|-----------|-----------|
| Ru | 0.017775  | 0.238790  | 0.025717  |
| O  | -1.538576 | -0.188654 | 2.834797  |
| H  | -2.045921 | -0.375477 | 3.634346  |
| O  | 2.191912  | 1.620375  | -1.883827 |
| H  | 2.810073  | 1.993152  | -2.524052 |
| N  | -1.256972 | 1.383965  | 1.246854  |
| N  | 0.256083  | 2.077179  | -0.799368 |
| N  | -1.712314 | -0.188141 | -1.088621 |
| N  | -0.487022 | -1.676453 | 0.756448  |
| N  | 1.367255  | -0.858722 | -1.133297 |
| N  | 1.742045  | 0.464242  | 1.146051  |
| C  | -1.907662 | 1.004014  | 2.342092  |
| C  | -2.896307 | 1.778312  | 2.960476  |
| H  | -3.384150 | 1.426080  | 3.865199  |
| C  | -3.222787 | 3.016109  | 2.384873  |
| H  | -3.990125 | 3.637773  | 2.837918  |
| C  | -2.552010 | 3.445601  | 1.264321  |
| H  | -2.772389 | 4.415609  | 0.834362  |
| C  | -1.538370 | 2.627404  | 0.692242  |
| C  | -0.751273 | 3.001628  | -0.412069 |
| C  | -0.884257 | 4.233626  | -1.109966 |
| H  | -1.705052 | 4.901136  | -0.873359 |
| C  | 0.041634  | 4.584115  | -2.053083 |
| H  | -0.039262 | 5.527899  | -2.584519 |
| C  | 1.139438  | 3.716788  | -2.320357 |
| H  | 1.915230  | 3.999567  | -3.026375 |
| C  | 1.198004  | 2.500143  | -1.672782 |
| C  | -2.292044 | 0.574575  | -2.010350 |
| H  | -1.794034 | 1.509563  | -2.246758 |
| C  | -3.480488 | 0.197988  | -2.652857 |
| H  | -3.910475 | 0.859107  | -3.399265 |
| C  | -4.079071 | -1.002301 | -2.329184 |
| H  | -5.000718 | -1.314557 | -2.815379 |

C -3.480947 -1.834004 -1.360151  
 C -2.289897 -1.375229 -0.761926  
 C -1.628830 -2.174019 0.218595  
 C -2.159165 -3.428947 0.580685  
 C -1.443935 -4.179327 1.536301  
 H -1.814236 -5.154210 1.845947  
 C -0.276027 -3.666374 2.063434  
 H 0.301275 -4.220348 2.797690  
 C 0.171894 -2.404802 1.647178  
 H 1.076838 -1.967498 2.058145  
 C -4.009860 -3.105300 -0.964827  
 H -4.930999 -3.451199 -1.427542  
 C -3.374103 -3.872096 -0.035393  
 H -3.780463 -4.838816 0.252064  
 C 1.143297 -1.497202 -2.272096  
 H 0.144830 -1.404727 -2.690364  
 C 2.137218 -2.248893 -2.918374  
 H 1.901031 -2.750707 -3.852009  
 C 3.395587 -2.335247 -2.358821  
 H 4.181958 -2.910627 -2.842443  
 C 3.660377 -1.663564 -1.146878  
 C 2.600817 -0.936571 -0.571186  
 C 2.806141 -0.218779 0.643077  
 C 4.068510 -0.223042 1.266956  
 C 4.202807 0.532232 2.450912  
 H 5.159917 0.561070 2.967341  
 C 3.117598 1.234375 2.939555  
 H 3.194659 1.830291 3.843973  
 C 1.894754 1.177551 2.257377  
 H 1.016402 1.712774 2.605099  
 C 4.932780 -1.670961 -0.487087  
 H 5.746198 -2.238305 -0.933073  
 C 5.130271 -0.977579 0.669481  
 H 6.102514 -0.983906 1.156277  
 total energy= -1880.61288144  
 zpe= -1880.092609  
 th energy= -1880.060076  
 th enthalpy= -1880.059132  
 free energy= -1880.155357  
  
 pbe0-d3bj-bs1-2a--gs-triplet  
 Ru -0.007650 0.140865 -0.130539  
 O -2.093352 0.101449 2.704778  
 H -2.765715 -0.103565 3.366057  
 O 1.832357 1.418043 -2.211611  
 H 2.497914 1.689439 -2.856397  
 N -1.480495 1.647219 1.203212  
 N 0.175497 2.173517 -0.903529  
 N -1.757115 -0.362724 -1.161013  
 N -0.527991 -1.698841 0.788109  
 N 1.715010 -1.294246 -1.015168  
 N 1.761506 0.548184 0.982498  
 C -2.386018 1.258624 2.092520  
 C -3.545087 1.995639 2.367695  
 H -4.263532 1.654038 3.109516  
 C -3.748126 3.170510 1.662409  
 H -4.643086 3.762155 1.837224

C -2.802616 3.587208 0.724812  
 H -2.963139 4.491523 0.147893  
 C -1.672339 2.797796 0.533745  
 C -0.609707 3.172266 -0.425591  
 C -0.416402 4.494027 -0.809931  
 H -1.024242 5.282873 -0.381264  
 C 0.591123 4.797013 -1.723716  
 H 0.761452 5.824615 -2.034104  
 C 1.378134 3.777361 -2.229341  
 H 2.169051 3.975748 -2.948600  
 C 1.134537 2.475047 -1.785010  
 C -2.346733 0.322416 -2.138132  
 H -1.859941 1.246583 -2.436583  
 C -3.527750 -0.109806 -2.755887  
 H -3.961690 0.489044 -3.551070  
 C -4.119232 -1.287327 -2.342940  
 H -5.037037 -1.642317 -2.806480  
 C -3.521305 -2.034906 -1.308447  
 C -2.331221 -1.527785 -0.747387  
 C -1.675012 -2.238098 0.299254  
 C -2.217482 -3.446785 0.781752  
 C -1.521625 -4.095112 1.822060  
 H -1.902110 -5.030809 2.226093  
 C -0.360580 -3.532556 2.314726  
 H 0.198519 -4.007344 3.115570  
 C 0.107174 -2.329494 1.767959  
 H 1.019272 -1.862766 2.129310  
 C -4.052961 -3.266863 -0.805461  
 H -4.969915 -3.653979 -1.243321  
 C -3.427940 -3.943836 0.198112  
 H -3.840235 -4.878236 0.571569  
 C 1.661903 -2.190508 -1.984193  
 H 0.692542 -2.329190 -2.460751  
 C 2.780482 -2.934788 -2.395758  
 H 2.684150 -3.657489 -3.200923  
 C 3.986033 -2.728999 -1.757867  
 H 4.872958 -3.288852 -2.047296  
 C 4.068880 -1.782573 -0.714980  
 C 2.886779 -1.082740 -0.381489  
 C 2.912610 -0.108721 0.674679  
 C 4.121144 0.137262 1.365561  
 C 4.105669 1.097992 2.396553  
 H 5.019321 1.310489 2.947565  
 C 2.929892 1.754566 2.694156  
 H 2.880364 2.498249 3.483849  
 C 1.776327 1.449640 1.961135  
 H 0.826700 1.936416 2.167017  
 C 5.277635 -1.510741 0.002074  
 H 6.178507 -2.057743 -0.266329  
 C 5.301781 -0.587466 1.001382  
 H 6.221766 -0.384229 1.544360  
 el energy= -1880.62542369  
 zpe= -1880.103090  
 th energy= -1880.070004  
 th enthalpy= -1880.069060  
 free energy= -1880.169728



```

pbe0-d3bj-bs1-2a--gs-singlet
Ru -0.008885 0.236449 0.028205
O -1.688717 0.065837 2.774855
H -2.242271 -0.067341 3.554539
O 2.028869 1.320700 -2.217406
H 2.650728 1.590139 -2.904900
N -1.197052 1.576352 1.169780
N 0.361363 2.103357 -0.909105
N -1.719445 -0.181850 -1.095818
N -0.601465 -1.564412 0.883287
N 1.253467 -1.002476 -1.062616
N 1.744254 0.415683 1.132151
C -1.910420 1.279187 2.263116
C -2.819853 2.170080 2.843047
H -3.383684 1.877500 3.725832
C -2.982861 3.416449 2.268645
H -3.688612 4.127869 2.688905
C -2.219648 3.753120 1.153916
H -2.326713 4.732984 0.705023
C -1.328025 2.820885 0.636909
C -0.430217 3.127796 -0.488819
C -0.363046 4.393291 -1.059550
H -0.997905 5.197966 -0.709633
C 0.551072 4.629338 -2.082814
H 0.621609 5.610729 -2.544019
C 1.378053 3.601497 -2.493996
H 2.114632 3.750458 -3.280179
C 1.255872 2.352985 -1.874331
C -2.260178 0.532911 -2.078303
H -1.743278 1.449849 -2.346232
C -3.426908 0.137378 -2.748307
H -3.820890 0.763092 -3.543721
C -4.050658 -1.040597 -2.389854
H -4.954208 -1.371015 -2.897361
C -3.500952 -1.822890 -1.353737
C -2.330389 -1.343016 -0.731031
C -1.720598 -2.090499 0.321016
C -2.282382 -3.316354 0.732266
C -1.624592 -4.015207 1.764745
H -2.019571 -4.967182 2.112500
C -0.479891 -3.477417 2.316930
H 0.056267 -3.989984 3.110278
C 0.000515 -2.245436 1.849712
H 0.887736 -1.790175 2.278918
C -4.059608 -3.066102 -0.912162
H -4.963150 -3.430589 -1.395021
C -3.473005 -3.783549 0.086349
H -3.902268 -4.729000 0.409515
C 0.973028 -1.702096 -2.153943
H -0.025101 -1.576596 -2.563249
C 1.905536 -2.554118 -2.764753
H 1.618650 -3.102631 -3.657130
C 3.168489 -2.679942 -2.223494
H 3.909564 -3.332921 -2.679167
C 3.494621 -1.948162 -1.063183
C 2.492199 -1.122424 -0.516720
C 2.762105 -0.350764 0.652735
C 4.032504 -0.405131 1.260738
C 4.235432 0.389831 2.407511
H 5.200427 0.380747 2.909380
C 3.200161 1.173028 2.877337
H 3.322971 1.799338 3.756009
C 1.965484 1.158234 2.212226
H 1.128595 1.757272 2.559325
C 4.776088 -1.996263 -0.423340
H 5.544491 -2.638365 -0.847449
C 5.035519 -1.254199 0.689443
H 6.013194 -1.295844 1.163659
el energy= -1880.69420844
zpe= -1880.169806
th energy= -1880.137860
th enthalpy= -1880.136916
free energy= -1880.232423
pbe0-d3bj-bs1-2b--td-sing--vsing-
1001
Ru -0.010156 0.241891 0.074319
O 1.565729 0.182630 3.035040
O -2.136062 1.562619 -2.076327
N 1.235913 1.524116 1.211945
N -0.283723 2.109141 -0.840049
N -1.263830 -0.888482 -1.084577
N -1.748300 0.430830 1.148342
N 1.695826 -0.213798 -1.077295
N 0.540544 -1.588145 0.921250
C 1.900313 1.174536 2.390772
C 2.974210 2.041102 2.841822
H 3.524735 1.705736 3.715482
C 3.245671 3.227769 2.207801
H 4.040692 3.882047 2.558949
C 2.469732 3.594095 1.105275
H 2.647588 4.535295 0.600994
C 1.471721 2.708708 0.645751
C 0.591327 3.061345 -0.477156
C 0.642665 4.324833 -1.076091
H 1.360987 5.068738 -0.755678
C -0.272078 4.619589 -2.098935
H -0.247026 5.590919 -2.589121
C -1.196464 3.675801 -2.456577
H -1.939096 3.853725 -3.228962
C -1.259509 2.380953 -1.799838
C -0.986734 -1.522145 -2.216686
H 0.028442 -1.407965 -2.584493
C -1.938441 -2.290741 -2.901795
H -1.649431 -2.788532 -3.823045
C -3.218934 -2.406036 -2.398333
H -3.974968 -2.996268 -2.911956
C -3.541112 -1.741909 -1.200187
C -2.522193 -0.992913 -0.580839
C -2.787121 -0.278352 0.621936
C -4.067831 -0.318921 1.208412
C -4.262626 0.417919 2.391957
H -5.235304 0.414015 2.879365
C -3.204288 1.138002 2.915028

```

|   |           |           |           |
|---|-----------|-----------|-----------|
| H | -3.315078 | 1.715672  | 3.828437  |
| C | -1.962995 | 1.120857  | 2.266562  |
| H | -1.104417 | 1.658711  | 2.656332  |
| C | -4.833608 | -1.778978 | -0.583212 |
| H | -5.618036 | -2.362783 | -1.060756 |
| C | -5.086586 | -1.098893 | 0.569675  |
| H | -6.074308 | -1.133044 | 1.024936  |
| C | 2.276150  | 0.484488  | -2.066732 |
| H | 1.797757  | 1.427963  | -2.314286 |
| C | 3.391258  | 0.046835  | -2.758967 |
| H | 3.802500  | 0.659659  | -3.555068 |
| C | 3.963701  | -1.199880 | -2.423309 |
| H | 4.837795  | -1.576124 | -2.949655 |
| C | 3.389930  | -1.954008 | -1.399435 |
| C | 2.247252  | -1.431445 | -0.731250 |
| C | 1.637656  | -2.153786 | 0.307837  |
| C | 2.147354  | -3.421214 | 0.722111  |
| C | 1.503343  | -4.075939 | 1.774940  |
| H | 1.873233  | -5.044058 | 2.109377  |
| C | 0.406859  | -3.481158 | 2.387843  |
| H | -0.111370 | -3.954615 | 3.215424  |
| C | -0.029482 | -2.230516 | 1.921501  |
| H | -0.870562 | -1.727022 | 2.390424  |
| C | 3.881749  | -3.236940 | -0.973207 |
| H | 4.754526  | -3.643080 | -1.481918 |
| C | 3.289227  | -3.935815 | 0.036154  |
| H | 3.685154  | -4.903240 | 0.341187  |

total energy= -1879.86909072  
zpe= -1879.376839  
th energy= -1879.344617  
th enthalpy= -1879.343673  
free energy= -1879.440351

pbe0-d3bj-bs1-2b--td-sing--vtrip-1001

|    |           |           |           |
|----|-----------|-----------|-----------|
| Ru | 0.025313  | 0.265893  | 0.111533  |
| O  | 0.929405  | 0.497854  | 3.223316  |
| O  | -2.207622 | 1.182971  | -2.092554 |
| N  | 0.950841  | 1.629761  | 1.237936  |
| N  | -0.441511 | 2.011332  | -0.896391 |
| N  | -1.147130 | -1.093948 | -1.029714 |
| N  | -1.798009 | 0.281351  | 1.155217  |
| N  | 1.604478  | -0.103676 | -1.135712 |
| N  | 0.819666  | -1.446837 | 1.042788  |
| C  | 1.438741  | 1.379914  | 2.529510  |
| C  | 2.512179  | 2.237895  | 2.979034  |
| H  | 2.980940  | 1.977645  | 3.923311  |
| C  | 2.840121  | 3.362740  | 2.279257  |
| H  | 3.617816  | 4.029781  | 2.647924  |
| C  | 2.152243  | 3.693551  | 1.086900  |
| H  | 2.374095  | 4.613056  | 0.557020  |
| C  | 1.209993  | 2.816594  | 0.602723  |
| C  | 0.369526  | 3.052277  | -0.583684 |
| C  | 0.359123  | 4.240585  | -1.289756 |
| H  | 1.011527  | 5.061299  | -1.013875 |
| C  | -0.543854 | 4.356718  | -2.365058 |
| H  | -0.565580 | 5.274540  | -2.951311 |

|   |           |           |           |
|---|-----------|-----------|-----------|
| C | -1.400642 | 3.330876  | -2.660608 |
| H | -2.122156 | 3.396231  | -3.470219 |
| C | -1.409093 | 2.106279  | -1.891476 |
| C | -0.781914 | -1.770338 | -2.105835 |
| H | 0.241368  | -1.622365 | -2.436354 |
| C | -1.666069 | -2.615562 | -2.794588 |
| H | -1.313283 | -3.143341 | -3.675763 |
| C | -2.961779 | -2.753727 | -2.347937 |
| H | -3.669826 | -3.396791 | -2.866564 |
| C | -3.370285 | -2.046296 | -1.199786 |
| C | -2.414377 | -1.225575 | -0.574774 |
| C | -2.766761 | -0.483164 | 0.593124  |
| C | -4.067093 | -0.575209 | 1.126315  |
| C | -4.340656 | 0.166194  | 2.292691  |
| H | -5.333866 | 0.126640  | 2.735536  |
| C | -3.340109 | 0.926040  | 2.859775  |
| H | -3.511648 | 1.501172  | 3.764886  |
| C | -2.070547 | 0.959659  | 2.261954  |
| H | -1.246630 | 1.517963  | 2.691820  |
| C | -4.689513 | -2.117118 | -0.646808 |
| H | -5.423676 | -2.750728 | -1.139915 |
| C | -5.025082 | -1.411869 | 0.468332  |
| H | -6.029705 | -1.473702 | 0.880974  |
| C | 2.020561  | 0.615350  | -2.218736 |
| H | 1.398819  | 1.465823  | -2.479705 |
| C | 3.129362  | 0.273643  | -2.949394 |
| H | 3.402610  | 0.876435  | -3.810515 |
| C | 3.895507  | -0.866342 | -2.585475 |
| H | 4.774782  | -1.155499 | -3.155730 |
| C | 3.506423  | -1.615530 | -1.471142 |
| C | 2.354001  | -1.207294 | -0.749889 |
| C | 1.927635  | -1.922146 | 0.375938  |
| C | 2.629735  | -3.080162 | 0.827245  |
| C | 2.147231  | -3.732250 | 1.964414  |
| H | 2.660829  | -4.619429 | 2.331848  |
| C | 1.025473  | -3.236521 | 2.620889  |
| H | 0.635093  | -3.709805 | 3.516270  |
| C | 0.405107  | -2.080826 | 2.126467  |
| H | -0.446247 | -1.640972 | 2.635940  |
| C | 4.200139  | -2.784344 | -1.003938 |
| H | 5.086626  | -3.101892 | -1.550449 |
| C | 3.781757  | -3.485900 | 0.089558  |
| H | 4.329237  | -4.366670 | 0.421014  |

total energy= -1879.86732688  
zpe= -1879.373128  
th energy= -1879.341173  
th enthalpy= -1879.340229  
free energy= -1879.436408

pbe0-d3bj-bs1-2b--td-trip--vsing-1001

|    |           |           |           |
|----|-----------|-----------|-----------|
| Ru | 0.013305  | 0.257090  | 0.116811  |
| O  | 0.991974  | 0.387709  | 3.222746  |
| O  | -2.297670 | 1.313290  | -1.944573 |
| N  | 1.000062  | 1.557046  | 1.257730  |
| N  | -0.450940 | 2.047043  | -0.809419 |
| N  | -1.196761 | -1.022499 | -1.073300 |

N -1.784692 0.221348 1.199663  
 N 1.574004 -0.073714 -1.147827  
 N 0.823267 -1.504939 0.978642  
 C 1.514078 1.263293 2.532069  
 C 2.629397 2.071605 2.975687  
 H 3.107832 1.773481 3.903486  
 C 2.976797 3.201052 2.294339  
 H 3.785018 3.834327 2.655769  
 C 2.263699 3.582984 1.132188  
 H 2.499473 4.508787 0.619495  
 C 1.276742 2.752498 0.649790  
 C 0.404642 3.053042 -0.496895  
 C 0.399264 4.266921 -1.156612  
 H 1.085223 5.059769 -0.880247  
 C -0.549819 4.447032 -2.182100  
 H -0.572669 5.386189 -2.733549  
 C -1.451354 3.458031 -2.471546  
 H -2.208079 3.576033 -3.242198  
 C -1.462760 2.205097 -1.749445  
 C -0.861403 -1.625710 -2.200830  
 H 0.156034 -1.463459 -2.541798  
 C -1.768578 -2.416407 -2.924034  
 H -1.441003 -2.884877 -3.847325  
 C -3.054308 -2.577454 -2.455927  
 H -3.778803 -3.180361 -2.999584  
 C -3.431140 -1.946578 -1.254101  
 C -2.454686 -1.174273 -0.599820  
 C -2.773278 -0.502846 0.617939  
 C -4.061125 -0.618964 1.175719  
 C -4.302500 0.054282 2.389300  
 H -5.285376 -0.004645 2.852417  
 C -3.282695 0.774487 2.975394  
 H -3.428957 1.298038 3.915564  
 C -2.027799 0.835403 2.350955  
 H -1.190480 1.362261 2.794602  
 C -4.737187 -2.044226 -0.674883  
 H -5.488286 -2.640059 -1.189102  
 C -5.040292 -1.408313 0.490241  
 H -6.035405 -1.489246 0.922151  
 C 1.955881 0.656520 -2.248610  
 H 1.319384 1.501165 -2.489027  
 C 3.049054 0.335613 -3.005075  
 H 3.292429 0.950797 -3.866587  
 C 3.849819 -0.794653 -2.670615  
 H 4.721941 -1.063231 -3.260004  
 C 3.484818 -1.566858 -1.553801  
 C 2.343112 -1.183519 -0.809593  
 C 1.938168 -1.938733 0.298149  
 C 2.660704 -3.095761 0.717365  
 C 2.194369 -3.778617 1.847246  
 H 2.724735 -4.665754 2.190814  
 C 1.073912 -3.318306 2.521588  
 H 0.697381 -3.816660 3.409118  
 C 0.426570 -2.164023 2.049035  
 H -0.435589 -1.756709 2.567730  
 C 4.198071 -2.733330 -1.121381  
 H 5.080364 -3.026604 -1.688073

C 3.807721 -3.469412 -0.035959  
 H 4.373024 -4.348456 0.268216  
 total energy= -1879.87549063  
 zpe= -1879.382450  
 th energy= -1879.350377  
 th enthalpy= -1879.349433  
 free energy= -1879.444590

pbe0-d3bj-bs1-2b--td-trip--vtrip-  
 1001  
 Ru 0.055480 0.316624 0.070950  
 O 1.029615 0.120902 3.154056  
 O -1.838686 1.849741 -2.081331  
 N 1.317988 1.403595 1.290017  
 N 0.106978 2.081745 -0.884245  
 N -1.293181 -0.670020 -1.177300  
 N -1.692428 0.697600 1.076768  
 N 1.736865 -0.424387 -0.950724  
 N 0.282819 -1.583633 0.959571  
 C 1.663323 1.013821 2.578179  
 C 2.771090 1.729516 3.170798  
 H 3.097025 1.393129 4.151045  
 C 3.345092 2.800271 2.540345  
 H 4.163046 3.340390 3.015378  
 C 2.866813 3.230354 1.285812  
 H 3.271877 4.114827 0.807261  
 C 1.846534 2.501960 0.703739  
 C 1.168255 2.885901 -0.549411  
 C 1.515650 3.978181 -1.310569  
 H 2.363617 4.593788 -1.032247  
 C 0.738700 4.295564 -2.452039  
 H 1.022182 5.144217 -3.072520  
 C -0.369430 3.562005 -2.749996  
 H -1.017206 3.793678 -3.590195  
 C -0.783334 2.451788 -1.911984  
 C -1.067246 -1.295406 -2.321709  
 H -0.040670 -1.278140 -2.678283  
 C -2.077806 -1.949697 -3.038661  
 H -1.830085 -2.454328 -3.967479  
 C -3.372767 -1.945145 -2.541926  
 H -4.177788 -2.445678 -3.076554  
 C -3.646295 -1.280827 -1.338657  
 C -2.564914 -0.645764 -0.681282  
 C -2.775574 0.078240 0.514477  
 C -4.067745 0.163143 1.084106  
 C -4.211856 0.910975 2.260346  
 H -5.190220 0.998163 2.728046  
 C -3.095168 1.540016 2.815312  
 H -3.174496 2.122296 3.728260  
 C -1.856604 1.411226 2.197390  
 H -0.955312 1.857698 2.603352  
 C -4.944532 -1.198354 -0.741009  
 H -5.776113 -1.694084 -1.238071  
 C -5.145624 -0.511841 0.418246  
 H -6.139308 -0.453203 0.857945  
 C 2.482620 0.188279 -1.881519  
 H 2.219641 1.218945 -2.100019

C 3.521252 -0.444014 -2.550240  
 H 4.082312 0.107752 -3.298436  
 C 3.825290 -1.778612 -2.251415  
 H 4.635286 -2.296632 -2.759934  
 C 3.078573 -2.441212 -1.274595  
 C 2.031178 -1.727781 -0.635419  
 C 1.265386 -2.337041 0.378390  
 C 1.536206 -3.668692 0.795030  
 C 0.767960 -4.193211 1.837245  
 H 0.946949 -5.210837 2.179456  
 C -0.206502 -3.399642 2.434716  
 H -0.810726 -3.767766 3.257748  
 C -0.406823 -2.097519 1.969012  
 H -1.137161 -1.441418 2.429512  
 C 3.313948 -3.798169 -0.864079  
 H 4.110354 -4.351706 -1.357936  
 C 2.582247 -4.381059 0.124921  
 H 2.787558 -5.405524 0.430126  
 total energy= -1879.86652593  
 zpe= -1879.373304  
 th energy= -1879.341456  
 th enthalpy= -1879.340512  
 free energy= -1879.436452

pbe0-d3bj-bs1-2b--gs-triplet-mc  
 Ru -0.059098 0.018938 -0.108393  
 O -2.453946 0.323422 2.227261  
 O 1.912022 0.545837 -2.226172  
 N -1.199528 1.756287 0.977648  
 N 0.586526 1.845150 -0.940515  
 N -1.789967 -0.125716 -1.248311  
 N -1.012281 -1.689179 0.737647  
 N 1.650573 -1.889492 -0.626688  
 N 1.729063 0.220676 1.099757  
 C -2.245064 1.485947 1.840138  
 C -3.042265 2.624626 2.241048  
 H -3.857530 2.439315 2.936044  
 C -2.788358 3.875449 1.738792  
 H -3.411147 4.718245 2.039465  
 C -1.738129 4.085146 0.822355  
 H -1.557082 5.062452 0.387845  
 C -0.973246 2.983740 0.471917  
 C 0.134496 3.044733 -0.511531  
 C 0.678324 4.224222 -0.996065  
 H 0.328601 5.185147 -0.635447  
 C 1.704687 4.135207 -1.954335  
 H 2.148153 5.050343 -2.346441  
 C 2.151903 2.915322 -2.400707  
 H 2.940335 2.824328 -3.142837  
 C 1.582574 1.699523 -1.886752  
 C -2.146454 0.678989 -2.247665  
 H -1.399264 1.405037 -2.554761  
 C -3.406231 0.605667 -2.853509  
 H -3.641025 1.287058 -3.666127  
 C -4.330818 -0.319205 -2.405376  
 H -5.319203 -0.387133 -2.855175  
 C -3.983735 -1.177297 -1.346209

C -2.690739 -1.043561 -0.801786  
 C -2.272969 -1.877561 0.273405  
 C -3.153851 -2.838197 0.807761  
 C -2.682027 -3.618295 1.878316  
 H -3.330691 -4.366908 2.328732  
 C -1.398070 -3.415516 2.346864  
 H -1.003342 -3.997258 3.174886  
 C -0.593466 -2.438527 1.748215  
 H 0.420376 -2.247965 2.089212  
 C -4.862098 -2.163916 -0.789985  
 H -5.861743 -2.261373 -1.208276  
 C -4.464706 -2.958000 0.242364  
 H -5.143851 -3.697665 0.661368  
 C 1.598222 -2.847470 -1.528246  
 H 0.603363 -3.114344 -1.884063  
 C 2.739765 -3.505880 -2.018067  
 H 2.639414 -4.283705 -2.770265  
 C 3.971940 -3.151448 -1.512485  
 H 4.881170 -3.645740 -1.850080  
 C 4.056197 -2.131345 -0.544102  
 C 2.848506 -1.507362 -0.154619  
 C 2.882730 -0.428761 0.801475  
 C 4.115892 -0.071189 1.394635  
 C 4.113575 0.960424 2.352428  
 H 5.049075 1.256929 2.823141  
 C 2.925850 1.581093 2.671726  
 H 2.879671 2.381549 3.404278  
 C 1.754426 1.187754 2.012091  
 H 0.798232 1.672245 2.197058  
 C 5.290680 -1.722897 0.052359  
 H 6.209164 -2.216552 -0.259297  
 C 5.315599 -0.743923 0.995289  
 H 6.253459 -0.440425 1.456129  
 el energy= -1879.84755763  
 zpe= -1879.352565  
 th energy= -1879.319804  
 th enthalpy= -1879.318860  
 free energy= -1879.419601

pbe0-d3bj-bs1-2b--gs-triplet  
 Ru 0.006600 0.249250 0.125430  
 O 0.999399 0.200130 3.233987  
 O -2.259965 1.511659 -1.881429  
 N 1.053531 1.463996 1.327267  
 N -0.371240 2.094990 -0.726084  
 N -1.254656 -0.898971 -1.132407  
 N -1.771510 0.198537 1.230010  
 N 1.577046 -0.082570 -1.157435  
 N 0.744910 -1.559998 0.909949  
 C 1.547089 1.095702 2.586062  
 C 2.687351 1.846106 3.063982  
 H 3.147325 1.497391 3.983815  
 C 3.095597 2.978517 2.420248  
 H 3.928972 3.560443 2.810852  
 C 2.417894 3.429664 1.263003  
 H 2.697555 4.362315 0.785967  
 C 1.398474 2.658983 0.752544

|                              |           |           |           |   |           |           |           |
|------------------------------|-----------|-----------|-----------|---|-----------|-----------|-----------|
| C                            | 0.547447  | 3.037545  | -0.387864 | O | -2.169077 | 1.323893  | -2.126668 |
| C                            | 0.623603  | 4.259654  | -1.027674 | N | 1.026434  | 1.456338  | 1.293020  |
| H                            | 1.358781  | 5.000339  | -0.733969 | N | -0.430690 | 2.018859  | -0.798032 |
| C                            | -0.305403 | 4.522399  | -2.054349 | N | -1.297523 | -0.990539 | -1.117057 |
| H                            | -0.261398 | 5.471078  | -2.587966 | N | -1.725163 | 0.195309  | 1.208702  |
| C                            | -1.270561 | 3.602943  | -2.364931 | N | 1.647478  | -0.042361 | -1.139169 |
| H                            | -2.015320 | 3.785403  | -3.134634 | N | 0.789516  | -1.591492 | 0.823820  |
| C                            | -1.368284 | 2.340575  | -1.665183 | C | 1.547068  | 1.071743  | 2.524505  |
| C                            | -0.956790 | -1.426464 | -2.308302 | C | 2.467239  | 1.996210  | 3.138877  |
| H                            | 0.062139  | -1.277961 | -2.652343 | H | 2.929707  | 1.675426  | 4.068367  |
| C                            | -1.900359 | -2.127922 | -3.074554 | C | 2.697010  | 3.234204  | 2.597714  |
| H                            | -1.601029 | -2.539165 | -4.034058 | H | 3.373223  | 3.930543  | 3.093096  |
| C                            | -3.185887 | -2.277720 | -2.600548 | C | 2.042397  | 3.625377  | 1.416303  |
| H                            | -3.938218 | -2.812448 | -3.176700 | H | 2.168827  | 4.623797  | 1.014261  |
| C                            | -3.524704 | -1.725717 | -1.349897 | C | 1.211424  | 2.705936  | 0.798475  |
| C                            | -2.512880 | -1.040177 | -0.653364 | C | 0.402127  | 3.016702  | -0.397396 |
| C                            | -2.792046 | -0.449384 | 0.613683  | C | 0.464645  | 4.236518  | -1.050276 |
| C                            | -4.075806 | -0.562674 | 1.182089  | H | 1.144943  | 5.012147  | -0.718672 |
| C                            | -4.276927 | 0.027899  | 2.444763  | C | -0.387088 | 4.442012  | -2.150448 |
| H                            | -5.254821 | -0.031551 | 2.918303  | H | -0.349062 | 5.387185  | -2.691745 |
| C                            | -3.223953 | 0.667959  | 3.065739  | C | -1.269269 | 3.465556  | -2.530342 |
| H                            | -3.338983 | 1.124162  | 4.044559  | H | -1.954161 | 3.597247  | -3.363661 |
| C                            | -1.975853 | 0.732509  | 2.428712  | C | -1.352240 | 2.205262  | -1.828557 |
| H                            | -1.110278 | 1.186911  | 2.898219  | C | -1.050451 | -1.574205 | -2.280265 |
| C                            | -4.825749 | -1.821226 | -0.759248 | H | -0.042806 | -1.455301 | -2.668476 |
| H                            | -5.604278 | -2.350338 | -1.304715 | C | -2.024638 | -2.286483 | -2.993882 |
| C                            | -5.090562 | -1.265263 | 0.455245  | H | -1.760904 | -2.734921 | -3.947568 |
| H                            | -6.082148 | -1.344779 | 0.895528  | C | -3.299788 | -2.397128 | -2.480271 |
| C                            | 1.991588  | 0.681511  | -2.205855 | H | -4.077315 | -2.938555 | -3.015097 |
| H                            | 1.389500  | 1.561503  | -2.409585 | C | -3.590716 | -1.792632 | -1.242135 |
| C                            | 3.085628  | 0.357577  | -2.970197 | C | -2.548768 | -1.097161 | -0.600657 |
| H                            | 3.361901  | 1.002838  | -3.798898 | C | -2.781259 | -0.457879 | 0.652028  |
| C                            | 3.832973  | -0.812096 | -2.676468 | C | -4.047933 | -0.529712 | 1.263744  |
| H                            | 4.702135  | -1.085143 | -3.269823 | C | -4.200496 | 0.105552  | 2.511762  |
| C                            | 3.436460  | -1.616714 | -1.605147 | H | -5.163063 | 0.078617  | 3.018481  |
| C                            | 2.297537  | -1.227776 | -0.852041 | C | -3.116625 | 0.750491  | 3.072665  |
| C                            | 1.852295  | -2.006744 | 0.222145  | H | -3.192985 | 1.244433  | 4.037118  |
| C                            | 2.532846  | -3.201894 | 0.600901  | C | -1.889507 | 0.775939  | 2.393721  |
| C                            | 2.039516  | -3.914544 | 1.695208  | H | -1.010588 | 1.256903  | 2.807587  |
| H                            | 2.537357  | -4.831421 | 2.006900  | C | -4.874511 | -1.844854 | -0.609142 |
| C                            | 0.924019  | -3.440979 | 2.381489  | H | -5.677800 | -2.379673 | -1.111855 |
| H                            | 0.524669  | -3.962120 | 3.245708  | C | -5.094066 | -1.241144 | 0.591917  |
| C                            | 0.320471  | -2.251977 | 1.956187  | H | -6.073828 | -1.288235 | 1.062854  |
| H                            | -0.529336 | -1.836195 | 2.487550  | C | 2.043197  | 0.749179  | -2.135850 |
| C                            | 4.107410  | -2.826086 | -1.213613 | H | 1.396913  | 1.594169  | -2.353911 |
| H                            | 4.984608  | -3.128771 | -1.783000 | C | 3.217804  | 0.511472  | -2.861400 |
| C                            | 3.677659  | -3.582981 | -0.163262 | H | 3.488898  | 1.196434  | -3.659763 |
| H                            | 4.207856  | -4.492923 | 0.112785  | C | 4.011235  | -0.576154 | -2.551335 |
| el energy= -1879.86786772    |           |           |           | H | 4.930141  | -0.776673 | -3.098338 |
| zpe= -1879.374433            |           |           |           | C | 3.614924  | -1.434482 | -1.508353 |
| th energy= -1879.342365      |           |           |           | C | 2.418528  | -1.122456 | -0.830472 |
| th enthalpy= -1879.341421    |           |           |           | C | 1.951178  | -1.958263 | 0.226714  |
| free energy= -1879.438102    |           |           |           | C | 2.690914  | -3.097230 | 0.608618  |
| pbe0-d3bj-bs1-2b--gs-singlet |           |           |           | C | 2.174353  | -3.880126 | 1.656446  |
| Ru                           | -0.023035 | 0.166446  | 0.058262  | H | 2.709807  | -4.768784 | 1.984206  |
| O                            | 1.206695  | -0.002405 | 3.048406  | C | 0.990561  | -3.496856 | 2.256573  |
|                              |           |           |           | H | 0.565901  | -4.068043 | 3.077018  |

C 0.334184 -2.339523 1.821393  
 H -0.573264 -1.989010 2.300232  
 C 4.350119 -2.595722 -1.102433  
 H 5.276153 -2.829900 -1.623460  
 C 3.907862 -3.389909 -0.088076  
 H 4.477000 -4.267545 0.211908  
 el energy= -1879.92382684  
 zpe= -1879.427219  
 th energy= -1879.395660  
 th enthalpy= -1879.394716  
 free energy= -1879.489578

pbe0-d3bj-bs1-3a--td-sing--vsing-1001

Ru -0.002214 0.723835 0.001799  
 O 1.861446 1.076421 -2.593503  
 O -1.827429 1.024613 2.629299  
 H -2.399600 1.081401 3.403794  
 N 0.748718 2.351985 -1.092544  
 N -0.780215 2.330607 1.107882  
 N 1.825351 0.702915 0.981547  
 N 0.946876 -0.873430 -0.974029  
 N -0.929028 -0.894374 0.964422  
 N -1.829263 0.685040 -0.979341  
 C 1.566032 2.314377 -2.155491  
 C 2.061804 3.444737 -2.782868  
 H 2.703915 3.355176 -3.654295  
 C 1.703920 4.699406 -2.255852  
 H 2.084963 5.607371 -2.715229  
 C 0.880984 4.771969 -1.159407  
 H 0.620409 5.736977 -0.741175  
 C 0.387686 3.587750 -0.562665  
 C -0.465738 3.575510 0.570043  
 C -1.000829 4.744444 1.161082  
 H -0.778629 5.715698 0.735198  
 C -1.813376 4.648676 2.263345  
 H -2.225544 5.544807 2.719054  
 C -2.118052 3.385088 2.802999  
 H -2.746879 3.277838 3.682088  
 C -1.585354 2.269892 2.179177  
 C 2.236254 1.543392 1.926792  
 H 1.534198 2.317728 2.219460  
 C 3.503171 1.424054 2.515309  
 H 3.794401 2.126026 3.290759  
 C 4.360052 0.419936 2.106785  
 H 5.344958 0.303060 2.550012  
 C 3.948403 -0.464358 1.088598  
 C 2.661706 -0.277418 0.550451  
 C 2.187041 -1.124469 -0.487480  
 C 3.002698 -2.159748 -0.981987  
 C 2.480283 -2.956943 -2.020942  
 H 3.082422 -3.761533 -2.433155  
 C 1.209994 -2.694135 -2.492509  
 H 0.776489 -3.287940 -3.291709  
 C 0.466156 -1.638556 -1.942110  
 H -0.529241 -1.397762 -2.304073  
 C 4.765590 -1.527977 0.587814

C 4.309923 -2.344206 -0.427909  
 C -0.431899 -1.669683 1.915942  
 H 0.560330 -1.418644 2.279586  
 C -1.152784 -2.752435 2.443587  
 H -0.703452 -3.358311 3.224778  
 C -2.418652 -3.030202 1.968758  
 H -2.999978 -3.861184 2.357821  
 C -2.963828 -2.213853 0.956776  
 C -2.167971 -1.155001 0.479772  
 C -2.653250 -0.308154 -0.553336  
 C -3.945545 -0.495936 -1.078033  
 C -4.379849 0.406686 -2.070311  
 H -5.374561 0.297747 -2.493183  
 C -3.532172 1.418212 -2.479725  
 H -3.839245 2.131831 -3.238244  
 C -2.256616 1.534070 -1.909653  
 H -1.563036 2.316220 -2.201660  
 C -4.267309 -2.413769 0.399379  
 C -4.752568 -1.566938 -0.576902  
 O 5.055422 -3.331232 -0.956373  
 O 5.973274 -1.680946 1.158719  
 C 6.441090 -3.245270 -0.616452  
 C 6.596260 -2.930874 0.855411  
 O -4.973597 -3.454360 0.875693  
 O -5.986390 -1.688095 -1.097489  
 C -6.108413 -3.791657 0.074865  
 C -6.847363 -2.536375 -0.334763  
 H 6.877882 -4.215045 -0.865830  
 H 6.909420 -2.464491 -1.230167  
 H 7.647560 -2.823584 1.132403  
 H 6.134698 -3.715543 1.469323  
 H -7.195697 -1.985990 0.549146  
 H -7.699033 -2.766453 -0.979071  
 H -5.766588 -4.345126 -0.809697  
 H -6.734903 -4.441148 0.690621  
 H 2.438400 1.150298 -3.362972  
 total energy= -2335.85022546  
 zpe= -2335.235596  
 th energy= -2335.196633  
 th enthalpy= -2335.195689  
 free energy= -2335.307132

pbe0-d3bj-bs1-3a--td-trip--vsing-1001

Ru 0.027601 0.771920 0.035471  
 O -1.397308 0.752855 2.943057  
 O 2.336672 1.673108 -1.993805  
 H 2.970617 1.896320 -2.685905  
 N -0.964741 2.176673 1.251592  
 N 0.540712 2.498327 -0.883589  
 N -1.807823 0.617690 -0.984661  
 N -0.770221 -0.994584 0.881496  
 N 1.093840 -0.593315 -1.134106  
 N 1.810585 0.714338 1.078002  
 C -1.604019 1.964301 2.400112  
 C -2.417069 2.917973 3.014422  
 H -2.904422 2.699345 3.960522

|   |           |           |           |                              |           |           |           |
|---|-----------|-----------|-----------|------------------------------|-----------|-----------|-----------|
| C | -2.568773 | 4.160158  | 2.379760  | H                            | -6.454523 | -4.737654 | 0.725080  |
| H | -3.198587 | 4.923104  | 2.829173  | H                            | -6.612353 | -3.012142 | 1.167766  |
| C | -1.899419 | 4.416394  | 1.205668  | H                            | -7.356880 | -3.323408 | -1.199561 |
| H | -1.981639 | 5.386859  | 0.730149  | H                            | -5.785257 | -4.080206 | -1.593720 |
| C | -1.067536 | 3.416693  | 0.639676  | H                            | 7.374515  | -1.486039 | -0.480861 |
| C | -0.285257 | 3.595029  | -0.520377 | H                            | 7.825414  | -2.473076 | 0.940438  |
| C | -0.256800 | 4.781043  | -1.295516 | H                            | 5.984232  | -4.080094 | 0.408012  |
| H | -0.946852 | 5.587058  | -1.071872 | H                            | 7.042984  | -3.906165 | -1.022508 |
| C | 0.660711  | 4.916098  | -2.302866 | H                            | -1.881885 | 0.690134  | 3.775067  |
| H | 0.699494  | 5.824885  | -2.896409 | total energy= -2335.85876870 |           |           |           |
| C | 1.596120  | 3.870849  | -2.552485 | zpe= -2335.245774            |           |           |           |
| H | 2.374032  | 3.984358  | -3.302205 | th energy= -2335.206794      |           |           |           |
| C | 1.499114  | 2.710054  | -1.821906 | th enthalpy= -2335.205850    |           |           |           |
| C | -2.285328 | 1.427294  | -1.924121 | free energy= -2335.316050    |           |           |           |
| H | -1.645414 | 2.250096  | -2.225815 | pbe0-d3bj-bs1-3a--gs-triplet |           |           |           |
| C | -3.547594 | 1.229493  | -2.504218 | Ru                           | -0.035800 | 0.661989  | -0.147164 |
| H | -3.889441 | 1.917789  | -3.271327 | O                            | -1.878548 | 1.026657  | 2.832718  |
| C | -4.330217 | 0.168195  | -2.099396 | O                            | 1.902271  | 1.563600  | -2.337383 |
| H | -5.309450 | -0.012922 | -2.533019 | H                            | 2.568486  | 1.701926  | -3.022256 |
| C | -3.840172 | -0.701736 | -1.104188 | N                            | -1.072004 | 2.426910  | 1.281525  |
| C | -2.563671 | -0.433252 | -0.572429 | N                            | 0.513516  | 2.624289  | -0.932791 |
| C | -2.007203 | -1.294702 | 0.416009  | N                            | -1.916979 | 0.547076  | -1.058728 |
| C | -2.736742 | -2.410890 | 0.870663  | N                            | -0.859011 | -1.044706 | 0.805868  |
| C | -2.132627 | -3.232475 | 1.843626  | N                            | 1.276265  | -1.086803 | -1.160911 |
| H | -2.669754 | -4.098060 | 2.220596  | N                            | 1.848282  | 0.670810  | 0.841683  |
| C | -0.865477 | -2.918856 | 2.291451  | C                            | -1.979141 | 2.219513  | 2.227788  |
| H | -0.366984 | -3.532447 | 3.035961  | C                            | -2.954299 | 3.166943  | 2.565127  |
| C | -0.210566 | -1.786853 | 1.785198  | H                            | -3.678405 | 2.969766  | 3.352499  |
| H | 0.777899  | -1.504647 | 2.134227  | C                            | -2.968357 | 4.360710  | 1.862169  |
| C | -4.572018 | -1.838032 | -0.632765 | H                            | -3.719300 | 5.114354  | 2.084989  |
| C | -4.041374 | -2.661203 | 0.338041  | C                            | -2.018977 | 4.588203  | 0.865579  |
| C | 0.703034  | -1.218497 | -2.234306 | H                            | -2.035106 | 5.507607  | 0.290331  |
| H | -0.278227 | -0.955473 | -2.619080 | C                            | -1.077685 | 3.594019  | 0.614298  |
| C | 1.511852  | -2.168941 | -2.878301 | C                            | -0.023147 | 3.756125  | -0.410987 |
| H | 1.145890  | -2.654417 | -3.778114 | C                            | 0.408044  | 5.015833  | -0.810336 |
| C | 2.754881  | -2.472947 | -2.362284 | H                            | -0.001781 | 5.906285  | -0.346970 |
| H | 3.401913  | -3.205281 | -2.836417 | C                            | 1.398799  | 5.118327  | -1.784747 |
| C | 3.190550  | -1.811593 | -1.195444 | H                            | 1.753592  | 6.093395  | -2.108262 |
| C | 2.313601  | -0.877951 | -0.612922 | C                            | 1.932475  | 3.965750  | -2.333781 |
| C | 2.700382  | -0.174464 | 0.561162  | H                            | 2.702349  | 4.007378  | -3.100450 |
| C | 3.968233  | -0.389028 | 1.133132  | C                            | 1.458826  | 2.734723  | -1.871664 |
| C | 4.303972  | 0.370523  | 2.272824  | C                            | -2.415380 | 1.348261  | -1.997433 |
| H | 5.277850  | 0.236727  | 2.735244  | H                            | -1.773466 | 2.160860  | -2.325193 |
| C | 3.389280  | 1.276726  | 2.774968  | C                            | -3.693271 | 1.161815  | -2.542120 |
| H | 3.621752  | 1.880331  | 3.647089  | H                            | -4.047043 | 1.841805  | -3.311377 |
| C | 2.143224  | 1.425609  | 2.150711  | C                            | -4.481563 | 0.118967  | -2.097399 |
| H | 1.396234  | 2.126733  | 2.509400  | H                            | -5.474589 | -0.054085 | -2.501790 |
| C | 4.467166  | -2.045248 | -0.589651 | C                            | -3.980022 | -0.737342 | -1.097279 |
| C | 4.852721  | -1.341025 | 0.532449  | C                            | -2.682687 | -0.484929 | -0.608114 |
| O | -4.702810 | -3.722989 | 0.833745  | C                            | -2.118853 | -1.329379 | 0.388465  |
| O | -5.775782 | -2.054916 | -1.192908 | C                            | -2.864925 | -2.406158 | 0.907513  |
| C | -6.095556 | -3.727548 | 0.514424  | C                            | -2.262102 | -3.195200 | 1.907098  |
| C | -6.296364 | -3.361111 | -0.939924 | H                            | -2.811188 | -4.029704 | 2.333632  |
| O | 5.250278  | -2.971635 | -1.171463 | C                            | -0.980791 | -2.888508 | 2.321061  |
| O | 6.058432  | -1.493961 | 1.109992  | H                            | -0.485425 | -3.476537 | 3.088032  |
| C | 6.350357  | -3.384020 | -0.358275 | C                            | -0.306036 | -1.803450 | 1.743609  |
| C | 7.002262  | -2.179360 | 0.284961  |                              |           |           |           |

|                              |           |           |           |   |           |           |           |
|------------------------------|-----------|-----------|-----------|---|-----------|-----------|-----------|
| H                            | 0.703495  | -1.538584 | 2.044790  | H | -2.834729 | 3.074527  | 3.839450  |
| C                            | -4.722210 | -1.844078 | -0.573839 | C | -2.298480 | 4.476502  | 2.290184  |
| C                            | -4.186945 | -2.645369 | 0.411878  | H | -2.860536 | 5.303650  | 2.715275  |
| C                            | 0.966601  | -1.940442 | -2.120193 | C | -1.563630 | 4.649108  | 1.120544  |
| H                            | -0.034481 | -1.853421 | -2.539651 | H | -1.546705 | 5.616372  | 0.633479  |
| C                            | 1.865161  | -2.915206 | -2.586315 | C | -0.858001 | 3.571138  | 0.599152  |
| H                            | 1.563865  | -3.594667 | -3.378478 | C | 0.008606  | 3.692846  | -0.584619 |
| C                            | 3.120599  | -2.993376 | -2.020249 | C | 0.227705  | 4.908396  | -1.222321 |
| H                            | 3.844483  | -3.735154 | -2.345196 | H | -0.264226 | 5.812377  | -0.884925 |
| C                            | 3.469213  | -2.090943 | -0.994317 | C | 1.109164  | 4.961097  | -2.298475 |
| C                            | 2.498092  | -1.145968 | -0.595084 | H | 1.296105  | 5.899768  | -2.812994 |
| C                            | 2.801055  | -0.219437 | 0.458082  | C | 1.755223  | 3.805192  | -2.694008 |
| C                            | 4.075538  | -0.249685 | 1.067094  | H | 2.462454  | 3.808846  | -3.520210 |
| C                            | 4.348046  | 0.681954  | 2.088319  | C | 1.486230  | 2.616888  | -2.006119 |
| H                            | 5.324244  | 0.679503  | 2.564284  | C | -2.265988 | 1.383608  | -1.987839 |
| C                            | 3.365069  | 1.574816  | 2.460661  | H | -1.624435 | 2.196990  | -2.313733 |
| H                            | 3.535461  | 2.304600  | 3.246546  | C | -3.507078 | 1.148054  | -2.597766 |
| C                            | 2.123808  | 1.537462  | 1.813010  | H | -3.832370 | 1.795757  | -3.406570 |
| H                            | 1.318963  | 2.216529  | 2.081008  | C | -4.291599 | 0.096154  | -2.170168 |
| C                            | 4.749279  | -2.113611 | -0.354917 | H | -5.253241 | -0.118421 | -2.626904 |
| C                            | 5.048735  | -1.206973 | 0.635809  | C | -3.824181 | -0.716919 | -1.118196 |
| O                            | -4.860037 | -3.674887 | 0.960041  | C | -2.568773 | -0.407126 | -0.557751 |
| O                            | -5.945442 | -2.053428 | -1.098308 | C | -2.036864 | -1.210157 | 0.492666  |
| C                            | -6.256772 | -3.667625 | 0.664044  | C | -2.770161 | -2.309898 | 0.980123  |
| C                            | -6.477508 | -3.343605 | -0.797699 | C | -2.196236 | -3.071632 | 2.017250  |
| O                            | 5.618419  | -3.056848 | -0.767863 | H | -2.735713 | -3.924565 | 2.418379  |
| O                            | 6.250907  | -1.161975 | 1.245647  | C | -0.952045 | -2.712862 | 2.494601  |
| C                            | 6.722422  | -3.239233 | 0.117794  | H | -0.473135 | -3.279077 | 3.288154  |
| C                            | 7.262926  | -1.895667 | 0.557669  | C | -0.293585 | -1.597735 | 1.955545  |
| H                            | -6.627949 | -4.664618 | 0.913107  | H | 0.676156  | -1.281495 | 2.326925  |
| H                            | -6.752515 | -2.923690 | 1.301972  | C | -4.558329 | -1.837756 | -0.614664 |
| H                            | -7.541795 | -3.300956 | -1.040937 | C | -4.052097 | -2.603803 | 0.413103  |
| H                            | -5.986354 | -4.089901 | -1.436389 | C | 0.538660  | -1.344722 | -2.116364 |
| H                            | 7.598653  | -1.313570 | -0.311196 | H | -0.443222 | -1.064888 | -2.486324 |
| H                            | 8.091621  | -2.009219 | 1.260718  | C | 1.284696  | -2.364044 | -2.727852 |
| H                            | 6.390450  | -3.823250 | 0.986679  | H | 0.866415  | -2.887350 | -3.582711 |
| H                            | 7.471181  | -3.808779 | -0.437967 | C | 2.532689  | -2.688867 | -2.236997 |
| H                            | -2.537399 | 0.953205  | 3.533825  | H | 3.133756  | -3.474429 | -2.685373 |
| el energy= -2335.86954384    |           |           |           | C | 3.030702  | -1.978808 | -1.126061 |
| zpe= -2335.255161            |           |           |           | C | 2.212551  | -0.977007 | -0.569616 |
| th energy= -2335.215571      |           |           |           | C | 2.663776  | -0.232466 | 0.558041  |
| th enthalpy= -2335.214627    |           |           |           | C | 3.936870  | -0.480076 | 1.107718  |
| free energy= -2335.329592    |           |           |           | C | 4.338730  | 0.303057  | 2.208481  |
| pbe0-d3bj-bs1-3a--gs-singlet |           |           |           | H | 5.317158  | 0.142944  | 2.651748  |
| Ru                           | 0.006930  | 0.793893  | 0.037311  | C | 3.472819  | 1.261032  | 2.696681  |
| O                            | -1.493646 | 0.989221  | 2.882601  | H | 3.747980  | 1.884216  | 3.542501  |
| O                            | 2.081517  | 1.467643  | -2.329909 | C | 2.217338  | 1.435996  | 2.095744  |
| H                            | 2.695475  | 1.610193  | -3.060892 | H | 1.511970  | 2.177331  | 2.459302  |
| N                            | -0.885565 | 2.342446  | 1.180950  | C | 4.314600  | -2.235964 | -0.545560 |
| N                            | 0.616842  | 2.544978  | -0.989865 | C | 4.761903  | -1.496770 | 0.528294  |
| N                            | -1.802813 | 0.628079  | -0.996380 | O | -4.718817 | -3.649321 | 0.939072  |
| N                            | -0.822770 | -0.860194 | 0.988254  | O | -5.741823 | -2.098932 | -1.204183 |
| N                            | 0.987677  | -0.668741 | -1.067377 | C | -6.096803 | -3.692378 | 0.568699  |
| N                            | 1.819369  | 0.710130  | 1.055924  | C | -6.247680 | -3.400314 | -0.908548 |
| C                            | -1.564046 | 2.200956  | 2.326301  | O | 5.040958  | -3.225540 | -1.101489 |
| C                            | -2.290240 | 3.242687  | 2.913149  | O | 5.977058  | -1.676902 | 1.082530  |
|                              |           |           |           | C | 6.136297  | -3.650918 | -0.291323 |



C 6.862797 -2.448943 0.272658  
 H -6.449450 -4.696564 0.815840  
 H -6.649661 -2.954180 1.165006  
 H -7.297934 -3.397233 -1.209767  
 H -5.698707 -4.141137 -1.505291  
 H 7.247764 -1.816597 -0.538675  
 H 7.688811 -2.749485 0.921672  
 H 5.754926 -4.285432 0.519958  
 H 6.786362 -4.242664 -0.940230  
 H -2.010592 0.971727 3.697572  
 el energy= -2335.93816887  
 zpe= -2335.321807  
 th energy= -2335.283315  
 th enthalpy= -2335.282370  
 free energy= -2335.392339

pbe0-d3bj-bs1-3b--td-sing--vsing-1001

Ru 0.027681 0.801280 0.087602  
 O -1.309413 1.269519 3.131690  
 O 2.284733 1.541034 -2.208693  
 N -0.874547 2.375314 1.177333  
 N 0.620091 2.512855 -0.966854  
 N -1.782615 0.631716 -0.980450  
 N -0.840960 -0.822323 1.081779  
 N 0.972712 -0.632124 -1.033814  
 N 1.815038 0.695984 1.091271  
 C -1.510383 2.248073 2.415110  
 C -2.383345 3.329225 2.835328  
 H -2.934837 3.169241 3.756856  
 C -2.466691 4.496129 2.117950  
 H -3.105967 5.312184 2.448212  
 C -1.699553 4.630655 0.957058  
 H -1.725898 5.551389 0.388230  
 C -0.915011 3.540982 0.528305  
 C -0.043682 3.637020 -0.651994  
 C 0.111360 4.839908 -1.350474  
 H -0.441390 5.726823 -1.067608  
 C 1.013468 4.880853 -2.424731  
 H 1.143783 5.800430 -2.992042  
 C 1.730368 3.756643 -2.734397  
 H 2.455618 3.734264 -3.542624  
 C 1.585424 2.526293 -1.974855  
 C -2.245765 1.357461 -2.002062  
 H -1.604226 2.173050 -2.324673  
 C -3.447262 1.097030 -2.647030  
 H -3.756849 1.722114 -3.478500  
 C -4.234775 0.009536 -2.217267  
 H -5.175797 -0.235200 -2.699474  
 C -3.783778 -0.762970 -1.152239  
 C -2.543636 -0.434083 -0.535927  
 C -2.046695 -1.194827 0.531254  
 C -2.779416 -2.302589 1.048401  
 C -2.259885 -2.999530 2.135552  
 H -2.811635 -3.841261 2.544025  
 C -1.042070 -2.590730 2.685948  
 H -0.608920 -3.098328 3.541701

C -0.380054 -1.496176 2.123540  
 H 0.557697 -1.138025 2.539280  
 C -4.503093 -1.896548 -0.636789  
 C -4.027649 -2.626767 0.420845  
 C 0.520167 -1.270735 -2.105730  
 H -0.468493 -0.979647 -2.446921  
 C 1.265955 -2.260789 -2.759099  
 H 0.840024 -2.753599 -3.628533  
 C 2.520997 -2.602055 -2.292910  
 H 3.121220 -3.367229 -2.775583  
 C 3.020949 -1.930969 -1.163423  
 C 2.206121 -0.953003 -0.565684  
 C 2.662544 -0.236720 0.576621  
 C 3.936736 -0.491964 1.117183  
 C 4.340110 0.259540 2.235344  
 H 5.319152 0.090750 2.673191  
 C 3.466235 1.200960 2.749049  
 H 3.735683 1.797646 3.616101  
 C 2.213413 1.392387 2.154218  
 H 1.495541 2.108728 2.540551  
 C 4.309009 -2.194229 -0.592691  
 C 4.755580 -1.492173 0.499418  
 O -4.708959 -3.688710 0.945273  
 O -5.678046 -2.195803 -1.268622  
 C -6.060714 -3.728803 0.537085  
 C -6.156884 -3.486843 -0.956445  
 O 5.047041 -3.168831 -1.190308  
 O 5.986314 -1.691483 1.048349  
 C 6.138779 -3.601635 -0.399134  
 C 6.858722 -2.405935 0.191829  
 H -6.441775 -4.718371 0.808802  
 H -6.635128 -2.958688 1.074215  
 H -7.194002 -3.530471 -1.304165  
 H -5.563284 -4.244451 -1.491105  
 H 7.207447 -1.744044 -0.614655  
 H 7.712505 -2.714493 0.802403  
 H 5.773009 -4.253060 0.408394  
 H 6.793586 -4.177572 -1.059840  
 total energy= -2335.09847051  
 zpe= -2334.513323  
 th energy= -2334.474633  
 th enthalpy= -2334.473689  
 free energy= -2334.585039

pbe0-d3bj-bs1-3b--td-sing--vtrip-1001

Ru -0.009591 0.817764 0.118527  
 O -0.761165 1.426549 3.223522  
 O 2.244953 1.253772 -2.210963  
 N -0.710387 2.378540 1.146301  
 N 0.639486 2.398152 -1.049064  
 N -1.674217 0.563684 -1.049127  
 N -0.976362 -0.697387 1.214685  
 N 0.925289 -0.778849 -0.933317  
 N 1.838318 0.681213 1.104882  
 C -1.180436 2.303003 2.466533  
 C -2.123533 3.325229 2.863517

|   |           |           |           |                                   |           |           |           |
|---|-----------|-----------|-----------|-----------------------------------|-----------|-----------|-----------|
| H | -2.589219 | 3.206407  | 3.837270  | C                                 | 6.895830  | -2.347696 | 0.113683  |
| C | -2.331184 | 4.420430  | 2.076371  | H                                 | -6.739309 | -4.347279 | 0.907461  |
| H | -3.006387 | 5.209842  | 2.403089  | H                                 | -6.845630 | -2.562525 | 0.995036  |
| C | -1.647891 | 4.559633  | 0.844176  | H                                 | -7.284576 | -3.329367 | -1.353617 |
| H | -1.770811 | 5.452132  | 0.240978  | H                                 | -5.691745 | -4.145619 | -1.360552 |
| C | -0.840392 | 3.531681  | 0.416538  | H                                 | 7.185594  | -1.718565 | -0.740489 |
| C | -0.019897 | 3.557986  | -0.806572 | H                                 | 7.785964  | -2.602070 | 0.696236  |
| C | 0.116240  | 4.673247  | -1.612068 | H                                 | 5.876491  | -4.210058 | 0.478044  |
| H | -0.415494 | 5.591797  | -1.391016 | H                                 | 6.818101  | -4.181457 | -1.043516 |
| C | 0.987045  | 4.582185  | -2.715899 | total energy= -2335.09733859      |           |           |           |
| H | 1.104105  | 5.438067  | -3.379596 | zpe= -2334.510405                 |           |           |           |
| C | 1.694961  | 3.432845  | -2.943599 | th energy= -2334.472018           |           |           |           |
| H | 2.388825  | 3.337226  | -3.774157 | th enthalpy= -2334.471074         |           |           |           |
| C | 1.576208  | 2.285038  | -2.071672 | free energy= -2334.581434         |           |           |           |
| C | -2.029151 | 1.224560  | -2.180723 | pbe0-d3bj-bs1-3b--td-trip--vsing- |           |           |           |
| H | -1.322428 | 1.973807  | -2.524072 | 1001                              |           |           |           |
| C | -3.187085 | 0.949764  | -2.867050 | Ru                                | 0.001577  | 0.795960  | 0.125841  |
| H | -3.410251 | 1.501819  | -3.774986 | O                                 | -0.821768 | 1.358621  | 3.233729  |
| C | -4.068160 | -0.059612 | -2.394425 | O                                 | 2.335365  | 1.366263  | -2.102083 |
| H | -4.983972 | -0.303656 | -2.922435 | N                                 | -0.778227 | 2.313356  | 1.155742  |
| C | -3.737784 | -0.740782 | -1.226455 | N                                 | 0.630572  | 2.418520  | -0.994912 |
| C | -2.530849 | -0.413469 | -0.554178 | N                                 | -1.659584 | 0.554226  | -1.046062 |
| C | -2.152021 | -1.083374 | 0.612119  | N                                 | -0.969739 | -0.762469 | 1.183472  |
| C | -2.970454 | -2.105652 | 1.176249  | N                                 | 0.984518  | -0.732658 | -0.970377 |
| C | -2.549607 | -2.717609 | 2.353587  | N                                 | 1.823467  | 0.642498  | 1.149385  |
| H | -3.162941 | -3.494853 | 2.800763  | C                                 | -1.265652 | 2.215914  | 2.470693  |
| C | -1.350268 | -2.310388 | 2.942610  | C                                 | -2.257704 | 3.194794  | 2.863123  |
| H | -0.997974 | -2.753295 | 3.868844  | H                                 | -2.724034 | 3.051998  | 3.833045  |
| C | -0.608283 | -1.290551 | 2.342651  | C                                 | -2.501578 | 4.283230  | 2.078092  |
| H | 0.305811  | -0.918950 | 2.794279  | H                                 | -3.212547 | 5.043544  | 2.396462  |
| C | -4.551158 | -1.781607 | -0.656945 | C                                 | -1.801387 | 4.454857  | 0.859804  |
| C | -4.188623 | -2.429952 | 0.496960  | H                                 | -1.948463 | 5.346139  | 0.260173  |
| C | 0.430062  | -1.495132 | -1.929117 | C                                 | -0.941055 | 3.465230  | 0.435730  |
| H | -0.576072 | -1.240683 | -2.246420 | C                                 | -0.091892 | 3.543617  | -0.764262 |
| C | 1.166003  | -2.515314 | -2.550943 | C                                 | 0.019369  | 4.675243  | -1.549667 |
| H | 0.711948  | -3.072460 | -3.365219 | H                                 | -0.560892 | 5.566271  | -1.337740 |
| C | 2.448175  | -2.791384 | -2.127787 | C                                 | 0.936068  | 4.638387  | -2.618712 |
| H | 3.046174  | -3.571376 | -2.589261 | H                                 | 1.038665  | 5.506994  | -3.268177 |
| C | 2.987276  | -2.035685 | -1.069369 | C                                 | 1.708194  | 3.527401  | -2.829489 |
| C | 2.178450  | -1.038471 | -0.499652 | H                                 | 2.438187  | 3.477535  | -3.632728 |
| C | 2.670698  | -0.252230 | 0.585490  | C                                 | 1.612853  | 2.362410  | -1.977503 |
| C | 3.969909  | -0.462742 | 1.081973  | C                                 | -2.002195 | 1.209659  | -2.190998 |
| C | 4.399014  | 0.338155  | 2.157214  | H                                 | -1.289173 | 1.953174  | -2.532535 |
| H | 5.400541  | 0.206592  | 2.555853  | C                                 | -3.154812 | 0.944066  | -2.884875 |
| C | 3.527575  | 1.269386  | 2.682713  | H                                 | -3.364609 | 1.497903  | -3.794951 |
| H | 3.816104  | 1.897691  | 3.520296  | C                                 | -4.056560 | -0.054358 | -2.418422 |
| C | 2.245614  | 1.415631  | 2.132651  | H                                 | -4.971701 | -0.287870 | -2.951019 |
| H | 1.520452  | 2.114097  | 2.534136  | C                                 | -3.732421 | -0.742297 | -1.248254 |
| C | 4.307671  | -2.239557 | -0.552835 | C                                 | -2.527837 | -0.426875 | -0.571225 |
| C | 4.787973  | -1.469833 | 0.477326  | C                                 | -2.155095 | -1.119399 | 0.583323  |
| O | -4.960910 | -3.401248 | 1.066767  | C                                 | -2.982321 | -2.139759 | 1.138371  |
| O | -5.695806 | -2.081873 | -1.338942 | C                                 | -2.564334 | -2.767737 | 2.309726  |
| C | -6.284933 | -3.409754 | 0.571878  | H                                 | -3.185898 | -3.543101 | 2.749184  |
| C | -6.271074 | -3.308939 | -0.940578 | C                                 | -1.360898 | -2.383059 | 2.900399  |
| O | 5.037192  | -3.228941 | -1.131769 | H                                 | -1.011404 | -2.839605 | 3.820803  |
| O | 6.045394  | -1.611519 | 0.976339  | C                                 | -0.605901 | -1.369666 | 2.302360  |
| C | 6.181837  | -3.590751 | -0.378092 |                                   |           |           |           |

|                                   |                |           |           |   |           |           |           |
|-----------------------------------|----------------|-----------|-----------|---|-----------|-----------|-----------|
| H                                 | 0.319760       | -1.022117 | 2.750309  | C | -2.339071 | 4.410073  | 2.361015  |
| C                                 | -4.554625      | -1.781279 | -0.690163 | H | -2.950443 | 5.201771  | 2.792341  |
| C                                 | -4.201642      | -2.446220 | 0.458776  | C | -1.768260 | 4.592536  | 1.084953  |
| C                                 | 0.524481       | -1.401207 | -2.014789 | H | -1.892927 | 5.524710  | 0.545608  |
| H                                 | -0.479111      | -1.146009 | -2.339044 | C | -1.023121 | 3.553176  | 0.560579  |
| C                                 | 1.291941       | -2.375004 | -2.671659 | C | -0.275841 | 3.632495  | -0.709564 |
| H                                 | 0.867081       | -2.894666 | -3.525397 | C | -0.285374 | 4.727673  | -1.542494 |
| C                                 | 2.568193       | -2.654260 | -2.231310 | H | -0.904494 | 5.587403  | -1.312259 |
| H                                 | 3.189293       | -3.399887 | -2.718498 | C | 0.538457  | 4.720492  | -2.694949 |
| C                                 | 3.070110       | -1.948085 | -1.122335 | H | 0.517443  | 5.572767  | -3.372391 |
| C                                 | 2.231983       | -0.994052 | -0.522072 | C | 1.370896  | 3.669205  | -2.933916 |
| C                                 | 2.684818       | -0.253334 | 0.609383  | H | 2.049534  | 3.640073  | -3.781207 |
| C                                 | 3.974961       | -0.467382 | 1.127057  | C | 1.440915  | 2.543406  | -2.020791 |
| C                                 | 4.366351       | 0.288954  | 2.247535  | C | -2.365626 | 1.397502  | -1.881584 |
| H                                 | 5.360480       | 0.155070  | 2.663391  | H | -1.792943 | 2.272761  | -2.173373 |
| C                                 | 3.466902       | 1.181702  | 2.793643  | C | -3.559508 | 1.076081  | -2.513850 |
| H                                 | 3.725378       | 1.775927  | 3.665240  | H | -3.926843 | 1.717652  | -3.309074 |
| C                                 | 2.196297       | 1.333572  | 2.220173  | C | -4.267330 | -0.067771 | -2.121597 |
| H                                 | 1.451111       | 2.000797  | 2.638027  | H | -5.201956 | -0.348456 | -2.596723 |
| C                                 | 4.381096       | -2.156910 | -0.584103 | C | -3.752392 | -0.850608 | -1.089266 |
| C                                 | 4.823247       | -1.431826 | 0.494282  | C | -2.524987 | -0.465923 | -0.491231 |
| O                                 | -4.984265      | -3.417449 | 1.016810  | C | -1.970081 | -1.218335 | 0.560031  |
| O                                 | -5.700308      | -2.066146 | -1.377098 | C | -2.641260 | -2.359488 | 1.073008  |
| C                                 | -6.306955      | -3.406761 | 0.519284  | C | -2.070032 | -3.033408 | 2.151378  |
| C                                 | -6.288009      | -3.291169 | -0.992015 | H | -2.567813 | -3.906344 | 2.563111  |
| O                                 | 5.141117       | -3.104077 | -1.193636 | C | -0.873802 | -2.556835 | 2.687957  |
| O                                 | 6.071022       | -1.578026 | 1.016167  | H | -0.404787 | -3.044168 | 3.536868  |
| C                                 | 6.275468       | -3.482829 | -0.432874 | C | -0.273763 | -1.427665 | 2.132463  |
| C                                 | 6.954374       | -2.253667 | 0.137363  | H | 0.639828  | -1.013155 | 2.544019  |
| H                                 | -6.772266      | -4.342626 | 0.844432  | C | -4.402028 | -2.030530 | -0.589893 |
| H                                 | -6.859991      | -2.557726 | 0.949096  | C | -3.878269 | -2.744162 | 0.457324  |
| H                                 | -7.300537      | -3.298049 | -1.407961 | C | 0.526205  | -1.123972 | -2.216997 |
| H                                 | -5.715719      | -4.129489 | -1.418382 | H | -0.452795 | -0.812808 | -2.571589 |
| H                                 | 7.250715       | -1.576755 | -0.677111 | C | 1.272145  | -2.097772 | -2.888824 |
| H                                 | 7.836156       | -2.521248 | 0.726668  | H | 0.863412  | -2.558267 | -3.783126 |
| H                                 | 5.963213       | -4.150168 | 0.383779  | C | 2.517451  | -2.467400 | -2.395613 |
| H                                 | 6.937569       | -4.027482 | -1.112252 | H | 3.121137  | -3.223197 | -2.889099 |
| total energy=                     | -2335.10498127 |           |           | C | 3.000292  | -1.842421 | -1.240656 |
| zpe=                              | -2334.519149   |           |           | C | 2.183331  | -0.869946 | -0.619845 |
| th energy=                        | -2334.480641   |           |           | C | 2.628485  | -0.185314 | 0.532607  |
| th enthalpy=                      | -2334.479697   |           |           | C | 3.896926  | -0.462289 | 1.090329  |
| free energy=                      | -2334.589148   |           |           | C | 4.297323  | 0.267648  | 2.214985  |
|                                   |                |           |           | H | 5.269464  | 0.077170  | 2.659300  |
| pbe0-d3bj-bs1-3b--td-trip--vtrip- |                |           |           | C | 3.434785  | 1.231836  | 2.739240  |
| 1001                              |                |           |           | H | 3.710269  | 1.810911  | 3.615356  |
| Ru                                | 0.003628       | 0.889762  | 0.078789  | C | 2.199209  | 1.453413  | 2.138781  |
| O                                 | -0.928777      | 1.205600  | 3.171964  | H | 1.484895  | 2.172759  | 2.524332  |
| O                                 | 2.266948       | 1.643889  | -2.137898 | C | 4.275438  | -2.133547 | -0.653924 |
| N                                 | -0.843874      | 2.387073  | 1.222249  | C | 4.710240  | -1.463585 | 0.461999  |
| N                                 | 0.488595       | 2.525309  | -0.982821 | O | -4.496308 | -3.840745 | 0.979194  |
| N                                 | -1.841458      | 0.652211  | -0.900414 | O | -5.562968 | -2.382781 | -1.213046 |
| N                                 | -0.786035      | -0.785441 | 1.088170  | C | -5.851125 | -3.947825 | 0.585300  |
| N                                 | 0.957142       | -0.532913 | -1.111279 | C | -5.977160 | -3.699414 | -0.904673 |
| N                                 | 1.802216       | 0.766361  | 1.063482  | O | 5.014300  | -3.100440 | -1.264318 |
| C                                 | -1.272819      | 2.206276  | 2.531543  | O | 5.929908  | -1.689329 | 1.025486  |
| C                                 | -2.107037      | 3.259890  | 3.065702  | C | 6.090286  | -3.561920 | -0.468433 |
| H                                 | -2.507175      | 3.102526  | 4.063439  | C | 6.810047  | -2.387665 | 0.164278  |

H -6.175577 -4.958190 0.852281  
H -6.456056 -3.213576 1.137930  
H -7.015240 -3.787646 -1.239628  
H -5.355478 -4.421919 -1.454823  
H 7.175942 -1.707893 -0.619446  
H 7.652193 -2.718612 0.779353  
H 5.707730 -4.230939 0.316773  
H 6.750864 -4.126059 -1.133691  
total energy= -2335.09665450  
zpe= -2334.511136  
th energy= -2334.472713  
th enthalpy= -2334.471768  
free energy= -2334.582447

pbe0-d3bj-bs1-3b--gs-triplet-mc

Ru -0.083114 0.404963 -0.137103  
O -2.370688 0.892284 2.285821  
O 1.865241 0.796072 -2.319202  
N -1.011103 2.220333 1.028680  
N 0.708142 2.179502 -0.957907  
N -1.876111 0.465030 -1.188411  
N -1.154530 -1.228303 0.717466  
N 1.397214 -1.648190 -0.782061  
N 1.765908 0.399314 0.987956  
C -2.057549 2.035963 1.912848  
C -2.732205 3.237708 2.352771  
H -3.542584 3.117785 3.067658  
C -2.376667 4.467299 1.859910  
H -2.910014 5.359671 2.188507  
C -1.337121 4.591777 0.916622  
H -1.079235 5.553654 0.486528  
C -0.687027 3.429237 0.532192  
C 0.392554 3.405389 -0.483781  
C 1.038167 4.539221 -0.952485  
H 0.798081 5.518278 -0.553088  
C 2.022598 4.377845 -1.944508  
H 2.544691 5.255653 -2.325224  
C 2.331651 3.133353 -2.436855  
H 3.085551 2.985898 -3.205415  
C 1.658725 1.964508 -1.938118  
C -2.202407 1.328821 -2.148439  
H -1.403676 1.985660 -2.480147  
C -3.493302 1.393218 -2.684089  
H -3.703100 2.113590 -3.469547  
C -4.482988 0.552965 -2.206858  
H -5.495052 0.585369 -2.598782  
C -4.161403 -0.356211 -1.184800  
C -2.836249 -0.369919 -0.710442  
C -2.447485 -1.275101 0.316587  
C -3.390404 -2.152144 0.883011  
C -2.955454 -3.001508 1.913751  
H -3.660861 -3.680121 2.383908  
C -1.632338 -2.943592 2.310679  
H -1.259531 -3.582229 3.106405  
C -0.761401 -2.042299 1.688398  
H 0.283079 -1.964025 1.976807  
C -5.108615 -1.262028 -0.604855

C -4.738781 -2.120262 0.400491  
C 1.205726 -2.584232 -1.688580  
H 0.176375 -2.729342 -2.015122  
C 2.249026 -3.364474 -2.214294  
H 2.038422 -4.121043 -2.965523  
C 3.530962 -3.160151 -1.748537  
H 4.369145 -3.748869 -2.109774  
C 3.754483 -2.161649 -0.781739  
C 2.642054 -1.409822 -0.343834  
C 2.828083 -0.361614 0.628630  
C 4.113720 -0.141244 1.170532  
C 4.271202 0.872734 2.132576  
H 5.254955 1.061375 2.551834  
C 3.167007 1.605276 2.512582  
H 3.240267 2.396942 3.252559  
C 1.931158 1.344570 1.909366  
H 1.038854 1.920178 2.144594  
C 5.049697 -1.904018 -0.230211  
C 5.221080 -0.928263 0.715354  
O -5.618139 -2.968917 0.998978  
O -6.372167 -1.216983 -1.107690  
C -6.968365 -2.616935 0.753710  
C -7.165177 -2.324853 -0.720520  
O 6.071459 -2.680969 -0.682426  
O 6.436461 -0.635487 1.256614  
C 7.231193 -2.599735 0.126522  
C 7.510706 -1.156195 0.494456  
H -7.576295 -3.466801 1.077501  
H -7.231144 -1.731219 1.350273  
H -8.202793 -2.057346 -0.941388  
H -6.882452 -3.205827 -1.315762  
H 7.639806 -0.555509 -0.417883  
H 8.406399 -1.068625 1.116441  
H 7.085084 -3.195105 1.040060  
H 8.049932 -3.029967 -0.457989  
el energy= -2335.07863002  
zpe= -2334.491309  
th energy= -2334.452100  
th enthalpy= -2334.451156  
free energy= -2334.566125

pbe0-d3bj-bs1-3b--gs-triplet

Ru 0.004912 0.788202 0.132492  
O -0.843870 1.265512 3.254856  
O 2.353344 1.483916 -2.056771  
N -0.814735 2.276012 1.201391  
N 0.592955 2.445532 -0.951761  
N -1.667983 0.547856 -1.048840  
N -0.938126 -0.790154 1.156563  
N 1.027757 -0.664881 -1.017889  
N 1.799373 0.602233 1.191014  
C -1.293228 2.140638 2.510958  
C -2.299529 3.096790 2.919253  
H -2.757126 2.934065 3.890602  
C -2.585480 4.183280 2.143989  
H -3.314910 4.919124 2.479148  
C -1.909966 4.386013 0.917465

|   |           |           |           |                              |           |           |           |
|---|-----------|-----------|-----------|------------------------------|-----------|-----------|-----------|
| H | -2.084068 | 5.281041  | 0.330731  | H                            | -5.670790 | -4.169014 | -1.463880 |
| C | -1.026759 | 3.423233  | 0.484458  | H                            | 7.299928  | -1.451281 | -0.612492 |
| C | -0.183341 | 3.536875  | -0.717889 | H                            | 7.857971  | -2.470578 | 0.749451  |
| C | -0.128594 | 4.666441  | -1.511293 | H                            | 6.014291  | -4.095382 | 0.260244  |
| H | -0.750392 | 5.529092  | -1.300116 | H                            | 7.026982  | -3.874974 | -1.198693 |
| C | 0.784075  | 4.672271  | -2.585617 | el energy= -2335.09797595    |           |           |           |
| H | 0.838481  | 5.542636  | -3.238512 | zpe= -2334.511994            |           |           |           |
| C | 1.612823  | 3.603420  | -2.793800 | th energy= -2334.473439      |           |           |           |
| H | 2.344197  | 3.587373  | -3.597089 | th enthalpy= -2334.472494    |           |           |           |
| C | 1.579006  | 2.439513  | -1.934580 | free energy= -2334.583609    |           |           |           |
| C | -2.016826 | 1.220852  | -2.171382 | pbe0-d3bj-bs1-3b--gs-singlet |           |           |           |
| H | -1.315108 | 1.982408  | -2.497971 | Ru                           | 0.020045  | 0.657748  | 0.069947  |
| C | -3.172670 | 0.953601  | -2.869431 | O                            | -1.097796 | 0.911572  | 3.100337  |
| H | -3.393629 | 1.522305  | -3.767568 | O                            | 2.206683  | 1.341806  | -2.271995 |
| C | -4.053279 | -0.060714 | -2.415418 | N                            | -0.807228 | 2.175037  | 1.212957  |
| H | -4.969007 | -0.295384 | -2.947991 | N                            | 0.616685  | 2.361313  | -0.966721 |
| C | -3.722181 | -0.764121 | -1.261571 | N                            | -1.718576 | 0.558782  | -1.044241 |
| C | -2.515248 | -0.447565 | -0.582789 | N                            | -0.961541 | -0.913659 | 1.023144  |
| C | -2.125824 | -1.150506 | 0.559793  | N                            | 1.080206  | -0.754833 | -1.038698 |
| C | -2.942359 | -2.183155 | 1.105311  | N                            | 1.767119  | 0.571110  | 1.150178  |
| C | -2.517471 | -2.823122 | 2.265339  | C                            | -1.320668 | 1.970107  | 2.489983  |
| H | -3.130270 | -3.608764 | 2.698055  | C                            | -2.091810 | 3.055912  | 3.043457  |
| C | -1.311579 | -2.432601 | 2.856807  | H                            | -2.550730 | 2.880261  | 4.012684  |
| H | -0.955152 | -2.897661 | 3.770426  | C                            | -2.189145 | 4.260141  | 2.396510  |
| C | -0.567404 | -1.408429 | 2.273173  | H                            | -2.752173 | 5.078263  | 2.845333  |
| H | 0.354703  | -1.057709 | 2.724629  | C                            | -1.542425 | 4.457905  | 1.163797  |
| C | -4.532588 | -1.818362 | -0.713586 | H                            | -1.561814 | 5.424222  | 0.673572  |
| C | -4.165309 | -2.490553 | 0.424573  | C                            | -0.858304 | 3.388719  | 0.609674  |
| C | 0.604775  | -1.274427 | -2.113869 | C                            | -0.068997 | 3.487615  | -0.635046 |
| H | -0.394973 | -1.015588 | -2.448277 | C                            | -0.008501 | 4.643573  | -1.395919 |
| C | 1.401478  | -2.197313 | -2.807146 | H                            | -0.573915 | 5.524968  | -1.116951 |
| H | 1.004668  | -2.672151 | -3.699662 | C                            | 0.814810  | 4.641965  | -2.536003 |
| C | 2.670621  | -2.486644 | -2.351071 | H                            | 0.869815  | 5.532620  | -3.161854 |
| H | 3.313499  | -3.194784 | -2.865158 | C                            | 1.554577  | 3.532658  | -2.849611 |
| C | 3.135195  | -1.841346 | -1.190405 | H                            | 2.215229  | 3.502822  | -3.711933 |
| C | 2.269186  | -0.935308 | -0.555360 | C                            | 1.513042  | 2.339622  | -2.035408 |
| C | 2.684344  | -0.254472 | 0.625495  | C                            | -2.060016 | 1.300848  | -2.097850 |
| C | 3.963731  | -0.483253 | 1.164001  | H                            | -1.327887 | 2.037138  | -2.415295 |
| C | 4.316640  | 0.214003  | 2.334047  | C                            | -3.283992 | 1.140348  | -2.758991 |
| H | 5.301340  | 0.068140  | 2.768000  | H                            | -3.506940 | 1.775653  | -3.611560 |
| C | 3.391613  | 1.064573  | 2.906058  | C                            | -4.188298 | 0.189194  | -2.325174 |
| H | 3.620046  | 1.610136  | 3.816976  | H                            | -5.144714 | 0.043369  | -2.817961 |
| C | 2.133772  | 1.234768  | 2.310661  | C                            | -3.847038 | -0.605567 | -1.216163 |
| H | 1.362828  | 1.858182  | 2.749981  | C                            | -2.596012 | -0.385280 | -0.607981 |
| C | 4.434740  | -2.065838 | -0.631351 | C                            | -2.183529 | -1.180506 | 0.501330  |
| C | 4.839513  | -1.400613 | 0.499243  | C                            | -3.036062 | -2.177428 | 1.015250  |
| O | -4.934549 | -3.473996 | 0.976702  | C                            | -2.581230 | -2.924980 | 2.114325  |
| O | -5.678234 | -2.106137 | -1.398914 | H                            | -3.214050 | -3.698025 | 2.539518  |
| C | -6.259961 | -3.474659 | 0.485271  | C                            | -1.329744 | -2.644415 | 2.629982  |
| C | -6.250404 | -3.342472 | -1.024817 | H                            | -0.943581 | -3.190905 | 3.485629  |
| O | 5.222638  | -2.966576 | -1.275242 | C                            | -0.553685 | -1.625490 | 2.067080  |
| O | 6.074979  | -1.563444 | 1.044545  | H                            | 0.411396  | -1.352537 | 2.478973  |
| C | 6.340510  | -3.378013 | -0.507047 | C                            | -4.700570 | -1.626501 | -0.685162 |
| C | 6.989435  | -2.177712 | 0.152541  | C                            | -4.314422 | -2.375556 | 0.398723  |
| H | -6.711701 | -4.419760 | 0.802595  | C                            | 0.702942  | -1.408340 | -2.128195 |
| H | -6.820814 | -2.637362 | 0.927476  | H                            | -0.298671 | -1.193996 | -2.489899 |
| H | -7.265004 | -3.355848 | -1.435389 |                              |           |           |           |

C 1.542413 -2.309508 -2.796533  
 H 1.177981 -2.811624 -3.688403  
 C 2.817291 -2.541497 -2.321702  
 H 3.494783 -3.230613 -2.816495  
 C 3.237768 -1.857643 -1.166514  
 C 2.329169 -0.974065 -0.558782  
 C 2.700960 -0.259757 0.616977  
 C 3.979555 -0.428053 1.178615  
 C 4.286022 0.299357 2.343671  
 H 5.267870 0.200393 2.796694  
 C 3.316997 1.122924 2.882765  
 H 3.508971 1.694406 3.786472  
 C 2.064706 1.236306 2.262964  
 H 1.274081 1.860800 2.663040  
 C 4.536838 -2.020195 -0.584739  
 C 4.899310 -1.321020 0.539664  
 O -5.109592 -3.332936 0.947806  
 O -5.892898 -1.806529 -1.317508  
 C -6.460339 -3.231332 0.532686  
 C -6.526375 -3.023815 -0.967182  
 O 5.370355 -2.900123 -1.203890  
 O 6.134386 -1.426593 1.103198  
 C 6.494187 -3.250190 -0.416661  
 C 7.083415 -2.012625 0.230310  
 H -6.948808 -4.163965 0.829835  
 H -6.941115 -2.387625 1.049077  
 H -7.560522 -2.948834 -1.316169  
 H -6.028827 -3.859547 -1.481391  
 H 7.369600 -1.285735 -0.543971  
 H 7.958431 -2.257827 0.839435  
 H 6.190743 -3.967626 0.360334  
 H 7.210052 -3.729368 -1.091199  
 el energy= -2335.15435038  
 zpe= -2334.565494  
 th energy= -2334.527421  
 th enthalpy= -2334.526477  
 free energy= -2334.635856

b3lyp-bs1-2a--td-sing--vsing-1001  
 Ru 0.000011 0.179221 0.000021  
 O -2.012109 0.560396 2.544114  
 H -2.630312 0.640007 3.284736  
 O 2.012422 0.561130 -2.543737  
 H 2.630696 0.640967 -3.284275  
 N -0.842169 1.836219 1.064069  
 N 0.841723 1.836530 -1.063928  
 N -1.791922 0.138506 -1.118895  
 N -1.045895 -1.441502 0.914507  
 N 1.046286 -1.441181 -0.914654  
 N 1.791938 0.138809 1.118866  
 C -1.715750 1.804515 2.089586  
 C -2.268623 2.937185 2.672284  
 H -2.951503 2.847727 3.512207  
 C -1.910829 4.193521 2.140072  
 H -2.337518 5.100648 2.559346  
 C -1.025786 4.264536 1.088156  
 H -0.765300 5.228671 0.668595

C -0.467123 3.080339 0.538105  
 C 0.466132 3.080516 -0.538027  
 C 1.024315 4.264921 -1.088109  
 H 0.763387 5.228968 -0.668619  
 C 1.909479 4.194232 -2.139948  
 H 2.335801 5.101522 -2.559241  
 C 2.267887 2.938023 -2.672041  
 H 2.950928 2.848809 -3.511858  
 C 1.715440 1.805146 -2.089337  
 C -2.143023 0.966870 -2.105947  
 H -1.420170 1.730346 -2.373088  
 C -3.378455 0.857986 -2.767857  
 H -3.613830 1.553682 -3.567685  
 C -4.272223 -0.129230 -2.388911  
 H -5.233561 -0.228690 -2.888245  
 C -3.932354 -1.012582 -1.337759  
 C -2.669242 -0.833864 -0.725808  
 C -2.268001 -1.678078 0.356054  
 C -3.129458 -2.706592 0.807028  
 C -2.673656 -3.507829 1.879427  
 H -3.301558 -4.310336 2.260248  
 C -1.430207 -3.258948 2.433097  
 H -1.051883 -3.854266 3.258868  
 C -0.641526 -2.212703 1.921083  
 H 0.332328 -1.988490 2.345538  
 C -4.789967 -2.063352 -0.862837  
 H -5.758666 -2.198446 -1.337698  
 C -4.403476 -2.877053 0.164126  
 H -5.060673 -3.668948 0.515167  
 C 0.642109 -2.212363 -1.921321  
 H -0.331775 -1.988304 -2.345790  
 C 1.431017 -3.258404 -2.433403  
 H 1.052843 -3.853714 -3.259250  
 C 2.674490 -3.507101 -1.879706  
 H 3.302560 -4.309453 -2.260578  
 C 3.130096 -2.705874 -0.807215  
 C 2.268420 -1.677570 -0.356185  
 C 2.669465 -0.833361 0.725753  
 C 3.932592 -1.011866 1.337734  
 C 4.272250 -0.128506 2.388945  
 H 5.233587 -0.227806 2.888313  
 C 3.378278 0.858522 2.767910  
 H 3.613497 1.554223 3.567780  
 C 2.142847 0.967203 2.105969  
 H 1.419838 1.730529 2.373117  
 C 4.404123 -2.876135 -0.164276  
 H 5.061490 -3.667873 -0.515352  
 C 4.790421 -2.062438 0.862762  
 H 5.759130 -2.197384 1.337645  
 el energy= -1882.60777204  
 total energy= -1882.53124697  
 zpe= -1882.013976  
 th energy= -1881.981253  
 th enthalpy= -1881.980309  
 free energy= -1882.077175

b3lyp-bs1-2a--td-trip--vsing-1001

|    |           |           |           |                              |           |           |           |
|----|-----------|-----------|-----------|------------------------------|-----------|-----------|-----------|
| Ru | 0.015144  | 0.214114  | 0.018710  | C                            | 4.267600  | 0.370952  | 2.434193  |
| O  | -1.693307 | 0.058048  | 2.802640  | H                            | 5.229103  | 0.372931  | 2.943116  |
| H  | -2.240761 | -0.039507 | 3.595201  | C                            | 3.229740  | 1.170516  | 2.883495  |
| O  | 2.166419  | 1.249862  | -2.193810 | H                            | 3.350001  | 1.816128  | 3.748287  |
| H  | 2.790562  | 1.530567  | -2.878568 | C                            | 1.997678  | 1.148202  | 2.208613  |
| N  | -1.141832 | 1.568651  | 1.197880  | H                            | 1.161278  | 1.760938  | 2.528285  |
| N  | 0.442396  | 2.034815  | -0.920383 | C                            | 4.847188  | -2.067034 | -0.358154 |
| N  | -1.770493 | -0.109066 | -1.105370 | H                            | 5.623071  | -2.710644 | -0.765727 |
| N  | -0.697132 | -1.644595 | 0.821916  | C                            | 5.092063  | -1.307693 | 0.750529  |
| N  | 1.316625  | -1.094412 | -1.060473 | H                            | 6.064737  | -1.337992 | 1.235444  |
| N  | 1.786849  | 0.373397  | 1.140715  | el energy= -1882.60618388    |           |           |           |
| C  | -1.876396 | 1.299504  | 2.288966  | total energy= -1882.53686732 |           |           |           |
| C  | -2.748110 | 2.211823  | 2.881192  | zpe= -1882.021098            |           |           |           |
| H  | -3.296748 | 1.945290  | 3.780237  | th energy= -1881.988220      |           |           |           |
| C  | -2.879914 | 3.484368  | 2.286670  | th enthalpy= -1881.987275    |           |           |           |
| H  | -3.562986 | 4.213289  | 2.714128  | free energy= -1882.084733    |           |           |           |
| C  | -2.131078 | 3.800112  | 1.176280  | b3lyp-bs1-2a--gs-triplet     |           |           |           |
| H  | -2.220685 | 4.780967  | 0.725262  | Ru                           | -0.033143 | 0.119452  | -0.128941 |
| C  | -1.228759 | 2.843789  | 0.627167  | O                            | -2.117802 | 0.369887  | 2.768039  |
| C  | -0.372465 | 3.107112  | -0.471626 | H                            | -2.764276 | 0.260570  | 3.480791  |
| C  | -0.271152 | 4.378380  | -1.102568 | O                            | 1.654359  | 1.221260  | -2.465686 |
| H  | -0.910680 | 5.190937  | -0.779277 | H                            | 2.278601  | 1.420548  | -3.179277 |
| C  | 0.654248  | 4.588786  | -2.094574 | N                            | -1.437063 | 1.810096  | 1.171599  |
| H  | 0.740934  | 5.561250  | -2.571012 | N                            | 0.176915  | 2.150243  | -1.037488 |
| C  | 1.519034  | 3.532192  | -2.484151 | N                            | -1.771052 | -0.443594 | -1.204365 |
| H  | 2.274746  | 3.677040  | -3.251041 | N                            | -0.640746 | -1.674876 | 0.901870  |
| C  | 1.376833  | 2.301588  | -1.867245 | N                            | 1.699720  | -1.394037 | -0.951876 |
| C  | -2.281897 | 0.675371  | -2.057238 | N                            | 1.772932  | 0.529439  | 1.003532  |
| H  | -1.712879 | 1.564031  | -2.307743 | C                            | -2.311668 | 1.553244  | 2.144093  |
| C  | -3.490855 | 0.374931  | -2.709874 | C                            | -3.345149 | 2.435616  | 2.500380  |
| H  | -3.858439 | 1.047907  | -3.478782 | H                            | -4.035798 | 2.192681  | 3.304773  |
| C  | -4.188014 | -0.768219 | -2.362392 | C                            | -3.457262 | 3.622152  | 1.788774  |
| H  | -5.125535 | -1.019340 | -2.853579 | H                            | -4.252837 | 4.325382  | 2.021405  |
| C  | -3.671741 | -1.618736 | -1.357398 | C                            | -2.542606 | 3.906125  | 0.769643  |
| C  | -2.449098 | -1.241689 | -0.751265 | H                            | -2.638927 | 4.820138  | 0.195110  |
| C  | -1.873908 | -2.060714 | 0.272261  | C                            | -1.532407 | 2.979088  | 0.498762  |
| C  | -2.522814 | -3.254951 | 0.669889  | C                            | -0.506011 | 3.226429  | -0.549320 |
| C  | -1.897807 | -4.029173 | 1.674395  | C                            | -0.249471 | 4.516967  | -1.016341 |
| H  | -2.360795 | -4.954351 | 2.010512  | H                            | -0.763775 | 5.367948  | -0.585973 |
| C  | -0.699935 | -3.598769 | 2.216299  | C                            | 0.696697  | 4.710921  | -2.025105 |
| H  | -0.192953 | -4.169920 | 2.988470  | H                            | 0.907970  | 5.710519  | -2.395935 |
| C  | -0.129005 | -2.396449 | 1.762604  | C                            | 1.363668  | 3.613706  | -2.549947 |
| H  | 0.801866  | -2.029124 | 2.183041  | H                            | 2.097686  | 3.721439  | -3.344822 |
| C  | -4.315314 | -2.830165 | -0.929952 | C                            | 1.069297  | 2.350569  | -2.020173 |
| H  | -5.254969 | -3.112190 | -1.398651 | C                            | -2.310388 | 0.172112  | -2.261718 |
| C  | -3.763238 | -3.615861 | 0.040984  | H                            | -1.811417 | 1.076250  | -2.596381 |
| H  | -4.257163 | -4.532443 | 0.354268  | C                            | -3.458773 | -0.304709 | -2.915831 |
| C  | 1.056196  | -1.805200 | -2.154193 | H                            | -3.847457 | 0.239508  | -3.771552 |
| H  | 0.065979  | -1.689136 | -2.584811 | C                            | -4.075178 | -1.455591 | -2.456624 |
| C  | 2.005736  | -2.660222 | -2.744919 | H                            | -4.967328 | -1.842553 | -2.943914 |
| H  | 1.737784  | -3.214888 | -3.639370 | C                            | -3.534113 | -2.133033 | -1.340434 |
| C  | 3.262105  | -2.775536 | -2.178384 | C                            | -2.369711 | -1.588008 | -0.745258 |
| H  | 4.013406  | -3.428183 | -2.617555 | C                            | -1.772160 | -2.236073 | 0.381327  |
| C  | 3.569895  | -2.030274 | -1.016109 | C                            | -2.352558 | -3.415654 | 0.909634  |
| C  | 2.552037  | -1.199109 | -0.490913 | C                            | -1.720787 | -4.005741 | 2.027893  |
| C  | 2.806866  | -0.411587 | 0.676215  | H                            | -2.133067 | -4.912558 | 2.465106  |
| C  | 4.076784  | -0.451139 | 1.298861  |                              |           |           |           |

|   |           |           |           |
|---|-----------|-----------|-----------|
| C | -0.581180 | -3.420817 | 2.552293  |
| H | -0.072455 | -3.849147 | 3.411011  |
| C | -0.069554 | -2.254104 | 1.958151  |
| H | 0.825842  | -1.776660 | 2.344550  |
| C | -4.100984 | -3.333015 | -0.789224 |
| H | -4.994545 | -3.744866 | -1.252116 |
| C | -3.535712 | -3.946953 | 0.291311  |
| H | -3.973749 | -4.854114 | 0.700807  |
| C | 1.645402  | -2.318108 | -1.903125 |
| H | 0.677299  | -2.466832 | -2.378426 |
| C | 2.762506  | -3.080009 | -2.298259 |
| H | 2.660785  | -3.822298 | -3.084899 |
| C | 3.971959  | -2.864832 | -1.664178 |
| H | 4.855500  | -3.437296 | -1.938717 |
| C | 4.061203  | -1.889642 | -0.643208 |
| C | 2.880071  | -1.168401 | -0.323128 |
| C | 2.918342  | -0.160986 | 0.709418  |
| C | 4.138071  | 0.085621  | 1.394929  |
| C | 4.142680  | 1.071921  | 2.406952  |
| H | 5.062098  | 1.281833  | 2.949178  |
| C | 2.976254  | 1.754766  | 2.694939  |
| H | 2.940893  | 2.516256  | 3.468483  |
| C | 1.812843  | 1.453418  | 1.968489  |
| H | 0.877597  | 1.966278  | 2.169836  |
| C | 5.277712  | -1.611447 | 0.066090  |
| H | 6.172399  | -2.173635 | -0.191320 |
| C | 5.312974  | -0.663542 | 1.045682  |
| H | 6.235808  | -0.457285 | 1.582623  |

el energy= -1882.55173007

zpe= -1882.035406

th energy= -1882.001787

th enthalpy= -1882.000843

free energy= -1882.102789

b3lyp-bs1-2a--gs-singlet

|    |           |           |           |
|----|-----------|-----------|-----------|
| Ru | -0.001517 | 0.216922  | 0.006578  |
| O  | -1.936362 | 0.506342  | 2.632886  |
| H  | -2.541068 | 0.528551  | 3.389304  |
| O  | 2.026406  | 0.832683  | -2.489337 |
| H  | 2.648661  | 0.957674  | -3.221097 |
| N  | -0.940679 | 1.850333  | 1.091403  |
| N  | 0.722232  | 1.987505  | -1.025702 |
| N  | -1.775395 | 0.007014  | -1.145144 |
| N  | -0.924765 | -1.435109 | 0.954497  |
| N  | 1.095854  | -1.286215 | -0.999804 |
| N  | 1.784445  | 0.164252  | 1.152357  |
| C  | -1.763700 | 1.750402  | 2.151326  |
| C  | -2.403472 | 2.853285  | 2.737177  |
| H  | -3.062413 | 2.711223  | 3.590642  |
| C  | -2.178271 | 4.110595  | 2.202461  |
| H  | -2.663153 | 4.986024  | 2.626031  |
| C  | -1.314305 | 4.236577  | 1.113960  |
| H  | -1.131705 | 5.215961  | 0.690754  |
| C  | -0.703930 | 3.098844  | 0.584364  |
| C  | 0.245315  | 3.177991  | -0.548117 |
| C  | 0.640649  | 4.401130  | -1.091436 |
| H  | 0.265346  | 5.335367  | -0.694019 |

|   |           |           |           |
|---|-----------|-----------|-----------|
| C | 1.542880  | 4.422408  | -2.155659 |
| H | 1.861972  | 5.366175  | -2.589685 |
| C | 2.026566  | 3.221912  | -2.647687 |
| H | 2.731350  | 3.192745  | -3.475474 |
| C | 1.591991  | 2.028058  | -2.051998 |
| C | -2.186593 | 0.742347  | -2.181587 |
| H | -1.529574 | 1.550877  | -2.487063 |
| C | -3.395405 | 0.499403  | -2.857749 |
| H | -3.673402 | 1.133903  | -3.694291 |
| C | -4.206079 | -0.544150 | -2.448065 |
| H | -5.144383 | -0.755001 | -2.956223 |
| C | -3.802494 | -1.344827 | -1.354990 |
| C | -2.572825 | -1.024729 | -0.728568 |
| C | -2.111050 | -1.800616 | 0.384140  |
| C | -2.881949 | -2.893412 | 0.850577  |
| C | -2.375152 | -3.628537 | 1.946616  |
| H | -2.933805 | -4.477473 | 2.334407  |
| C | -1.168550 | -3.254159 | 2.509253  |
| H | -0.746661 | -3.796447 | 3.350550  |
| C | -0.473830 | -2.149028 | 1.985249  |
| H | 0.467254  | -1.827381 | 2.419663  |
| C | -4.567810 | -2.455089 | -0.858864 |
| H | -5.510559 | -2.694707 | -1.344886 |
| C | -4.124651 | -3.198861 | 0.196762  |
| H | -4.709917 | -4.039621 | 0.561685  |
| C | 0.728875  | -2.001599 | -2.062250 |
| H | -0.238309 | -1.763199 | -2.493257 |
| C | 1.538499  | -3.007334 | -2.620709 |
| H | 1.181279  | -3.556774 | -3.486929 |
| C | 2.773114  | -3.276994 | -2.059011 |
| H | 3.419333  | -4.048133 | -2.472430 |
| C | 3.193875  | -2.535710 | -0.931071 |
| C | 2.310846  | -1.547272 | -0.432261 |
| C | 2.685506  | -0.765719 | 0.708697  |
| C | 3.940333  | -0.975449 | 1.331560  |
| C | 4.256471  | -0.170260 | 2.449874  |
| H | 5.210457  | -0.297998 | 2.956528  |
| C | 3.342061  | 0.772546  | 2.884810  |
| H | 3.552101  | 1.408537  | 3.739837  |
| C | 2.115675  | 0.908960  | 2.210382  |
| H | 1.378233  | 1.637091  | 2.534025  |
| C | 4.458523  | -2.733633 | -0.277783 |
| H | 5.129473  | -3.496147 | -0.666352 |
| C | 4.818073  | -1.984031 | 0.805198  |
| H | 5.778909  | -2.140779 | 1.289606  |

el energy= -1882.61681914

zpe= -1882.097968

th energy= -1882.065629

th enthalpy= -1882.064685

free energy= -1882.161630

b3lyp-bs1-2b--td-sing--vsing-1001

|    |           |          |           |
|----|-----------|----------|-----------|
| Ru | -0.018716 | 0.217628 | 0.058366  |
| O  | 1.819817  | 0.353347 | 2.922706  |
| O  | -2.239531 | 1.320498 | -2.191528 |
| N  | 1.151696  | 1.680632 | 1.163966  |
| N  | -0.494068 | 2.084197 | -0.889217 |



|   |           |           |           |                                   |               |                |           |
|---|-----------|-----------|-----------|-----------------------------------|---------------|----------------|-----------|
| N | -1.236393 | -1.047734 | -1.054362 | H                                 | 5.120221      | -3.275770      | -1.460451 |
| N | -1.781728 | 0.290971  | 1.181291  | C                                 | 3.705034      | -3.664017      | 0.087584  |
| N | 1.728609  | -0.143768 | -1.136215 | H                                 | 4.198914      | -4.576442      | 0.418858  |
| N | 0.727341  | -1.570519 | 0.940532  |                                   | el energy=    | -1881.83028491 |           |
| C | 1.929420  | 1.417860  | 2.308597  |                                   | total energy= | -1881.79716968 |           |
| C | 2.851341  | 2.449124  | 2.764810  |                                   | zpe=          | -1881.310135   |           |
| H | 3.471385  | 2.191656  | 3.618036  |                                   | th energy=    | -1881.277576   |           |
| C | 2.909429  | 3.677330  | 2.148177  |                                   | th enthalpy=  | -1881.276632   |           |
| H | 3.593993  | 4.449191  | 2.494055  |                                   | free energy=  | -1881.373791   |           |
| C | 2.058029  | 3.925674  | 1.066430  |                                   |               |                |           |
| H | 2.077547  | 4.889304  | 0.575678  |                                   |               |                |           |
| C | 1.189455  | 2.899140  | 0.610282  | b3lyp-bs1-2b--td-sing--vtrip-1001 |               |                |           |
| C | 0.248152  | 3.143467  | -0.502677 | Ru                                | 0.016752      | 0.289697       | 0.053759  |
| C | 0.123298  | 4.420104  | -1.076142 | O                                 | 1.243229      | 0.134103       | 3.121538  |
| H | 0.729422  | 5.250089  | -0.738375 | O                                 | -2.075162     | 1.716689       | -2.068162 |
| C | -0.823818 | 4.616183  | -2.097699 | N                                 | 1.235661      | 1.500969       | 1.275461  |
| H | -0.930935 | 5.596145  | -2.559628 | N                                 | -0.143259     | 2.109035       | -0.862853 |
| C | -1.607485 | 3.561892  | -2.489145 | N                                 | -1.320449     | -0.809052      | -1.174651 |
| H | -2.363703 | 3.654971  | -3.263355 | N                                 | -1.751890     | 0.487916       | 1.141927  |
| C | -1.489230 | 2.247726  | -1.868235 | N                                 | 1.764942      | -0.282760      | -1.045448 |
| C | -0.945196 | -1.685994 | -2.187428 | N                                 | 0.498882      | -1.613439      | 0.912637  |
| H | 0.050114  | -1.514452 | -2.583808 | C                                 | 1.712890      | 1.123673       | 2.537613  |
| C | -1.859711 | -2.529014 | -2.842246 | C                                 | 2.752267      | 1.963618       | 3.104494  |
| H | -1.556991 | -3.022182 | -3.761928 | H                                 | 3.171798      | 1.639092       | 4.052764  |
| C | -3.122586 | -2.718412 | -2.309113 | C                                 | 3.145228      | 3.124724       | 2.489441  |
| H | -3.849032 | -3.365192 | -2.796952 | H                                 | 3.909964      | 3.755727       | 2.940974  |
| C | -3.465003 | -2.051961 | -1.113277 | C                                 | 2.543658      | 3.521888       | 1.275015  |
| C | -2.482648 | -1.223270 | -0.521739 | H                                 | 2.811540      | 4.463371       | 0.809741  |
| C | -2.779061 | -0.503225 | 0.677096  | C                                 | 1.591645      | 2.681422       | 0.710338  |
| C | -4.053469 | -0.618831 | 1.283364  | C                                 | 0.818346      | 3.026868       | -0.508225 |
| C | -4.288959 | 0.128521  | 2.457598  | C                                 | 1.001878      | 4.201880       | -1.217384 |
| H | -5.254923 | 0.066855  | 2.954672  | H                                 | 1.774797      | 4.902142       | -0.922857 |
| C | -3.277312 | 0.933870  | 2.956025  | C                                 | 0.164240      | 4.493651       | -2.324213 |
| H | -3.420230 | 1.523226  | 3.857773  | H                                 | 0.324778      | 5.409006       | -2.891575 |
| C | -2.041069 | 0.989468  | 2.291899  | C                                 | -0.850400     | 3.640385       | -2.647683 |
| H | -1.225363 | 1.601372  | 2.663561  | H                                 | -1.547740     | 3.833792       | -3.457318 |
| C | -4.746894 | -2.163852 | -0.474057 | C                                 | -1.093996     | 2.433786       | -1.869755 |
| H | -5.497267 | -2.807095 | -0.929820 | C                                 | -1.096218     | -1.405299      | -2.342687 |
| C | -5.029390 | -1.479180 | 0.672698  | H                                 | -0.088046     | -1.313352      | -2.737470 |
| H | -6.006515 | -1.569666 | 1.143227  | C                                 | -2.082265     | -2.120190      | -3.040801 |
| C | 2.235196  | 0.571069  | -2.163045 | H                                 | -1.829930     | -2.592210      | -3.985815 |
| H | 1.669749  | 1.456964  | -2.437273 | C                                 | -3.362441     | -2.213534      | -2.501911 |
| C | 3.383640  | 0.216488  | -2.854905 | H                                 | -4.148241     | -2.760781      | -3.019396 |
| H | 3.727273  | 0.835756  | -3.678156 | C                                 | -3.641512     | -1.586206      | -1.277208 |
| C | 4.079633  | -0.958043 | -2.479246 | C                                 | -2.583239     | -0.882714      | -0.634953 |
| H | 4.981806  | -1.266662 | -3.002494 | C                                 | -2.810684     | -0.199380      | 0.585494  |
| C | 3.590725  | -1.727344 | -1.417712 | C                                 | -4.096409     | -0.217774      | 1.193744  |
| C | 2.402831  | -1.294492 | -0.750249 | C                                 | -4.267215     | 0.492213       | 2.392879  |
| C | 1.877766  | -2.040319 | 0.325261  | H                                 | -5.238254     | 0.498457       | 2.883642  |
| C | 2.520296  | -3.242826 | 0.772477  | C                                 | -3.181010     | 1.188565       | 2.940492  |
| C | 1.955933  | -3.931441 | 1.854094  | H                                 | -3.279531     | 1.743305       | 3.869011  |
| H | 2.426739  | -4.846844 | 2.210136  | C                                 | -1.949361     | 1.161838       | 2.289967  |
| C | 0.807623  | -3.434655 | 2.465863  | H                                 | -1.077843     | 1.666864       | 2.691712  |
| H | 0.348397  | -3.935385 | 3.312486  | C                                 | -4.928796     | -1.606524      | -0.640533 |
| C | 0.239504  | -2.244895 | 1.969476  | H                                 | -5.737131     | -2.151302      | -1.125082 |
| H | -0.645440 | -1.823056 | 2.438281  | C                                 | -5.145561     | -0.955963      | 0.539520  |
| C | 4.215835  | -2.942088 | -0.953818 | H                                 | -6.128453     | -0.976152      | 1.006786  |
|   |           |           |           | C                                 | 2.412915      | 0.404675       | -2.003696 |

H 2.017916 1.389525 -2.231837  
 C 3.518542 -0.097121 -2.686923  
 H 3.989208 0.511455 -3.453799  
 C 4.002386 -1.375229 -2.373988  
 H 4.865414 -1.790159 -2.890122  
 C 3.363269 -2.117418 -1.370672  
 C 2.236474 -1.537514 -0.719016  
 C 1.571804 -2.234683 0.318686  
 C 2.028273 -3.519154 0.740069  
 C 1.350857 -4.140771 1.798530  
 H 1.671900 -5.122440 2.142279  
 C 0.281834 -3.483952 2.404714  
 H -0.258053 -3.927682 3.235714  
 C -0.100917 -2.219844 1.935464  
 H -0.911673 -1.673645 2.403954  
 C 3.788157 -3.427907 -0.949557  
 H 4.644209 -3.875290 -1.451507  
 C 3.154520 -4.093587 0.059028  
 H 3.499610 -5.077973 0.370588  
 el energy= -1881.77841498  
 total energy= -1881.78835529  
 zpe= -1881.300937  
 th energy= -1881.268652  
 th enthalpy= -1881.267708  
 free energy= -1881.364574

b3lyp-bs1-2b--td-trip--vsing-1001  
 Ru -0.018796 0.222490 0.083829  
 O 1.441673 0.458626 3.138191  
 O -2.245963 1.347636 -2.149136  
 N 1.099661 1.659160 1.207738  
 N -0.452525 2.071658 -0.893041  
 N -1.230111 -1.044781 -1.053194  
 N -1.798207 0.289005 1.185434  
 N 1.713771 -0.140786 -1.125865  
 N 0.754976 -1.559213 0.978943  
 C 1.751852 1.425281 2.435825  
 C 2.757720 2.381223 2.875264  
 H 3.301687 2.126780 3.779515  
 C 2.943914 3.565367 2.200072  
 H 3.673510 4.297508 2.539565  
 C 2.157401 3.828288 1.071824  
 H 2.266714 4.766105 0.543021  
 C 1.240574 2.849426 0.608800  
 C 0.351813 3.104302 -0.545039  
 C 0.315238 4.351858 -1.176667  
 H 0.971266 5.158457 -0.874895  
 C -0.613093 4.548945 -2.218605  
 H -0.654743 5.507628 -2.733462  
 C -1.461083 3.529176 -2.564903  
 H -2.202075 3.634420 -3.352511  
 C -1.437387 2.243897 -1.878267  
 C -0.923647 -1.691532 -2.176723  
 H 0.085128 -1.544559 -2.547555  
 C -1.841176 -2.510908 -2.857373  
 H -1.526591 -3.010504 -3.769544  
 C -3.121958 -2.666483 -2.359308

H -3.852092 -3.293086 -2.867565  
 C -3.478804 -1.993382 -1.171036  
 C -2.492472 -1.190064 -0.552742  
 C -2.800270 -0.473985 0.646509  
 C -4.089205 -0.570794 1.223892  
 C -4.331686 0.158611 2.408281  
 H -5.309915 0.111579 2.882499  
 C -3.310971 0.923251 2.947464  
 H -3.456985 1.494044 3.860542  
 C -2.059783 0.963035 2.309696  
 H -1.235753 1.538884 2.716804  
 C -4.778883 -2.078551 -0.565782  
 H -5.532850 -2.699422 -1.045874  
 C -5.072043 -1.398457 0.580674  
 H -6.061559 -1.469909 1.027901  
 C 2.192188 0.557876 -2.174256  
 H 1.621508 1.441594 -2.444380  
 C 3.321501 0.193913 -2.895423  
 H 3.641776 0.803826 -3.734665  
 C 4.026265 -0.976629 -2.524986  
 H 4.914081 -1.291813 -3.068941  
 C 3.565302 -1.734311 -1.445901  
 C 2.394953 -1.295508 -0.748539  
 C 1.892399 -2.033594 0.339366  
 C 2.543862 -3.233445 0.779776  
 C 2.007155 -3.915987 1.876120  
 H 2.485786 -4.829563 2.225897  
 C 0.869640 -3.413670 2.514204  
 H 0.432612 -3.909197 3.375443  
 C 0.291618 -2.230707 2.026152  
 H -0.581254 -1.804466 2.512734  
 C 4.200974 -2.946630 -0.989579  
 H 5.092334 -3.285018 -1.515944  
 C 3.714866 -3.659449 0.067413  
 H 4.215178 -4.570403 0.393173  
 el energy= -1881.83192829  
 total energy= -1881.79865811  
 zpe= -1881.311393  
 th energy= -1881.278869  
 th enthalpy= -1881.277925  
 free energy= -1881.374608

b3lyp-bs1-2b--td-trip--vtrip-1001  
 Ru 0.028064 0.271333 0.092727  
 O 1.007632 0.574278 3.233003  
 O -2.139078 1.159752 -2.270849  
 N 0.939219 1.690007 1.218684  
 N -0.460412 2.036471 -0.959581  
 N -1.160539 -1.126747 -1.043951  
 N -1.822501 0.270688 1.154341  
 N 1.672476 -0.117483 -1.136812  
 N 0.859358 -1.440091 1.069809  
 C 1.458218 1.477274 2.521689  
 C 2.489740 2.395624 2.973025  
 H 2.968459 2.158450 3.918424  
 C 2.749346 3.542626 2.277329  
 H 3.486583 4.256404 2.641527

C 2.031093 3.829346 1.087794  
 H 2.201663 4.760260 0.559415  
 C 1.131789 2.900680 0.595805  
 C 0.287184 3.115035 -0.601522  
 C 0.223840 4.329482 -1.272963  
 H 0.823091 5.175696 -0.957314  
 C -0.661561 4.441007 -2.367383  
 H -0.722037 5.379916 -2.916735  
 C -1.447303 3.375868 -2.724416  
 H -2.151345 3.426499 -3.550449  
 C -1.400708 2.118620 -1.998498  
 C -0.815998 -1.615618 -2.143053  
 H 0.190988 -1.615618 -2.507651  
 C -1.694605 -2.657883 -2.814682  
 H -1.349597 -3.175252 -3.705294  
 C -2.977356 -2.835015 -2.329775  
 H -3.681010 -3.497556 -2.830029  
 C -3.375567 -2.139797 -1.168802  
 C -2.422598 -1.289918 -0.554576  
 C -2.775189 -0.548732 0.616795  
 C -4.072750 -0.673360 1.173600  
 C -4.364356 0.082164 2.328765  
 H -5.350451 0.013472 2.783623  
 C -3.384351 0.902181 2.866500  
 H -3.569926 1.494325 3.758128  
 C -2.124482 0.970184 2.252168  
 H -1.328260 1.581059 2.660502  
 C -4.682424 -2.250422 -0.585770  
 H -5.407471 -2.907536 -1.061933  
 C -5.016399 -1.550624 0.537326  
 H -6.010564 -1.641558 0.970199  
 C 2.106560 0.581718 -2.221595  
 H 1.505281 1.443865 -2.491041  
 C 3.219403 0.217937 -2.954268  
 H 3.506054 0.812527 -3.817003  
 C 3.961881 -0.930191 -2.579437  
 H 4.839111 -1.237277 -3.144374  
 C 3.557050 -1.667755 -1.460192  
 C 2.402713 -1.236639 -0.740968  
 C 1.968897 -1.933161 0.402348  
 C 2.672935 -3.089426 0.870302  
 C 2.201990 -3.722673 2.026718  
 H 2.715464 -4.606018 2.403323  
 C 1.086725 -3.206374 2.689534  
 H 0.702005 -3.664732 3.595558  
 C 0.461343 -2.058479 2.178871  
 H -0.386380 -1.614936 2.689813  
 C 4.242819 -2.842188 -0.981183  
 H 5.122564 -3.178192 -1.527797  
 C 3.821751 -3.519782 0.127621  
 H 4.361537 -4.400681 0.471830  
 el energy= -1881.77793542  
 total energy= -1881.78782694  
 zpe= -1881.300089  
 th energy= -1881.267785  
 th enthalpy= -1881.266841  
 free energy= -1881.363709

b3lyp-bs1-2b--gs-triplet

Ru 0.005131 0.270775 0.096470  
 O 1.086149 0.137545 3.221856  
 O -2.184456 1.722592 -1.932559  
 N 1.157157 1.458927 1.338589  
 N -0.244857 2.141204 -0.754463  
 N -1.324506 -0.791927 -1.194409  
 N -1.771136 0.274602 1.224954  
 N 1.681721 -0.174878 -1.128915  
 N 0.633720 -1.622417 0.886350  
 C 1.616994 1.078202 2.611849  
 C 2.714425 1.858714 3.153711  
 H 3.130660 1.516181 4.096920  
 C 3.148014 2.998149 2.529727  
 H 3.951581 3.591642 2.964210  
 C 2.529367 3.435768 1.334413  
 H 2.818306 4.375774 0.878185  
 C 1.534017 2.650011 0.777883  
 C 0.724924 3.047047 -0.396259  
 C 0.872267 4.258430 -1.050897  
 H 1.641807 4.959542 -0.748669  
 C -0.020763 4.582923 -2.100595  
 H 0.096206 5.527475 -2.630508  
 C -1.038576 3.727828 -2.423100  
 H -1.766590 3.952437 -3.197422  
 C -1.227879 2.473737 -1.712050  
 C -1.087999 -1.272325 -2.412549  
 H -0.081901 -1.128959 -2.794487  
 C -2.065629 -1.932348 -3.173995  
 H -1.805780 -2.312372 -4.157705  
 C -3.343302 -2.087845 -2.653336  
 H -4.122055 -2.592811 -3.221563  
 C -3.631816 -1.576917 -1.374406  
 C -2.582832 -0.928260 -0.672514  
 C -2.819756 -0.363766 0.610403  
 C -4.101727 -0.463067 1.212022  
 C -4.275515 0.116622 2.482232  
 H -5.245436 0.062449 2.972447  
 C -3.197253 0.749982 3.096173  
 H -3.293162 1.198462 4.080712  
 C -1.962021 0.805672 2.440873  
 H -1.088567 1.249561 2.903894  
 C -4.920621 -1.671022 -0.746899  
 H -5.722212 -2.173958 -1.284420  
 C -5.144840 -1.141500 0.490589  
 H -6.126711 -1.217580 0.953671  
 C 2.207176 0.563314 -2.132788  
 H 1.712536 1.508080 -2.333111  
 C 3.303163 0.154048 -2.879663  
 H 3.671620 0.794433 -3.675834  
 C 3.916073 -1.082560 -2.594987  
 H 4.777896 -1.424109 -3.164052  
 C 3.405035 -1.873203 -1.558647  
 C 2.274976 -1.392657 -0.832649  
 C 1.727339 -2.147448 0.224885  
 C 2.305918 -3.397573 0.606135

C 1.738425 -4.082849 1.686798  
 H 2.155689 -5.038984 1.997908  
 C 0.649941 -3.522574 2.360143  
 H 0.193466 -4.018534 3.211259  
 C 0.143357 -2.289998 1.932091  
 H -0.682676 -1.819384 2.452287  
 C 3.958799 -3.146785 -1.173529  
 H 4.819389 -3.519133 -1.726644  
 C 3.437568 -3.870734 -0.141015  
 H 3.878454 -4.826091 0.138867  
 el energy= -1881.78712628  
 zpe= -1881.299985  
 th energy= -1881.267511  
 th enthalpy= -1881.266566  
 free energy= -1881.363963

b3lyp-bs1-2b--gs-singlet

Ru -0.014564 0.164210 0.044290  
 O 1.314435 0.187745 3.039635  
 O -2.160303 1.132761 -2.283155  
 N 0.974245 1.586863 1.241118  
 N -0.525457 1.991795 -0.896041  
 N -1.279337 -1.123627 -1.081612  
 N -1.748861 0.162014 1.212097  
 N 1.692974 -0.039580 -1.163438  
 N 0.907896 -1.555600 0.887501  
 C 1.547612 1.279093 2.482986  
 C 2.392248 2.298004 3.068606  
 H 2.890090 2.038796 3.999292  
 C 2.507456 3.540990 2.496744  
 H 3.125816 4.306059 2.966522  
 C 1.807116 3.845560 1.311693  
 H 1.849811 4.841492 0.887126  
 C 1.046730 2.845001 0.717585  
 C 0.206685 3.071420 -0.484352  
 C 0.141892 4.300479 -1.130345  
 H 0.735277 5.140625 -0.789883  
 C -0.727630 4.435109 -2.231974  
 H -0.788227 5.389239 -2.755942  
 C -1.500718 3.374745 -2.632695  
 H -2.193422 3.444910 -3.467235  
 C -1.447860 2.096431 -1.951184  
 C -1.023222 -1.758055 -2.222686  
 H -0.026108 -1.622993 -2.631022  
 C -1.976538 -2.543784 -2.893198  
 H -1.702489 -3.029438 -3.825854  
 C -3.245782 -2.675775 -2.361595  
 H -4.006581 -3.272137 -2.861190  
 C -3.551352 -2.018680 -1.149808  
 C -2.527974 -1.250974 -0.546176  
 C -2.782136 -0.561704 0.682343  
 C -4.050929 -0.654324 1.302732  
 C -4.231654 0.032220 2.523857  
 H -5.193808 -0.010169 3.030557  
 C -3.173336 0.746130 3.057362  
 H -3.271280 1.280187 3.998495  
 C -1.944102 0.788649 2.375772

H -1.090140 1.326076 2.770730  
 C -4.833963 -2.090234 -0.507124  
 H -5.617359 -2.679019 -0.980409  
 C -5.073870 -1.437801 0.667577  
 H -6.049911 -1.499828 1.144812  
 C 2.060987 0.726194 -2.197745  
 H 1.386845 1.539311 -2.445697  
 C 3.243008 0.503112 -2.923092  
 H 3.485318 1.164764 -3.750211  
 C 4.078459 -0.544343 -2.573196  
 H 5.001596 -0.733707 -3.117279  
 C 3.718340 -1.375487 -1.490577  
 C 2.508995 -1.082641 -0.813298  
 C 2.083697 -1.895854 0.286028  
 C 2.878710 -2.991809 0.705852  
 C 2.408409 -3.757230 1.792995  
 H 2.986429 -4.608721 2.146571  
 C 1.214063 -3.401863 2.396385  
 H 0.824177 -3.958744 3.243899  
 C 0.500841 -2.289105 1.923305  
 H -0.415517 -1.965926 2.403472  
 C 4.505529 -2.492345 -1.045107  
 H 5.435971 -2.709662 -1.565914  
 C 4.103721 -3.264108 0.006608  
 H 4.710495 -4.105600 0.335536  
 el energy= -1881.84281633  
 zpe= -1881.351665  
 th energy= -1881.319681  
 th enthalpy= -1881.318736  
 free energy= -1881.414709

b3lyp-bs1-3a--td-sing--vsing-1001

Ru -0.002418 0.713398 0.000674  
 O 1.826926 1.107025 -2.675645  
 O -1.832255 1.088803 2.678204  
 H -2.395002 1.165610 3.461852  
 N 0.759846 2.377238 -1.116574  
 N -0.776690 2.369853 1.120293  
 N 1.852687 0.674577 1.006500  
 N 0.983253 -0.905169 -0.982877  
 N -0.976890 -0.914150 0.980749  
 N -1.856741 0.663233 -1.005873  
 C 1.556159 2.349427 -2.201743  
 C 2.059337 3.485007 -2.824383  
 H 2.681481 3.398286 -3.710490  
 C 1.732233 4.739418 -2.269189  
 H 2.121411 5.648874 -2.718944  
 C 0.924050 4.806336 -1.156807  
 H 0.686741 5.769520 -0.721625  
 C 0.414368 3.619025 -0.566971  
 C -0.440698 3.614989 0.572624  
 C -0.959258 4.797445 1.164508  
 H -0.729482 5.763132 0.730832  
 C -1.766252 4.722534 2.277254  
 H -2.162080 5.628285 2.728688  
 C -2.083281 3.464797 2.830852  
 H -2.703936 3.371964 3.717383

```

C    -1.571812  2.334087  2.206105
C    2.261293  1.497949  1.975919
H    1.561037  2.268041  2.280552
C    3.526695  1.370043  2.574737
H    3.809929  2.058356  3.365396
C    4.390731  0.374133  2.151853
H    5.372720  0.252561  2.599208
C    3.986466 -0.495916  1.112951
C    2.696645 -0.304979  0.564758
C    2.231356 -1.146390 -0.490010
C    3.062469 -2.174346 -0.994715
C    2.553617 -2.968491 -2.048385
H    3.165989 -3.762719 -2.464514
C    1.281605 -2.713412 -2.528023
H    0.859389 -3.302712 -3.336716
C    0.521070 -1.669482 -1.968761
H   -0.473417 -1.439826 -2.338538
C    4.815478 -1.551056  0.600485
C    4.371449 -2.357135 -0.432188
C   -0.504791 -1.684846  1.956895
H    0.486974 -1.447516  2.329132
C   -1.249593 -2.748826  2.499336
H   -0.817262 -3.346664  3.296327
C   -2.517069 -3.016200  2.014434
H   -3.114285 -3.831064  2.412275
C   -3.041231 -2.207513  0.979524
C   -2.223730 -1.162255  0.488096
C   -2.693836 -0.323355 -0.566441
C   -3.989057 -0.511145 -1.103066
C   -4.409027  0.374173 -2.122587
H   -5.399840  0.262615 -2.552760
C   -3.548830  1.372125 -2.548571
H   -3.842731  2.069866 -3.326979
C   -2.275753  1.493450 -1.965002
H   -1.579426  2.266762 -2.270457
C   -4.346372 -2.402337  0.412144
C   -4.813456 -1.568432 -0.587808
O    5.132962 -3.340016 -0.968597
O    6.029759 -1.706364  1.178211
C    6.529148 -3.261874 -0.618091
C    6.679192 -2.954043  0.863227
O   -5.077038 -3.429939  0.905393
O   -6.050615 -1.692552 -1.123147
C   -6.221716 -3.780950  0.102467
C   -6.944018 -2.524092 -0.356182
H    6.958971 -4.234306 -0.870381
H    7.003550 -2.482719 -1.228718
H    7.728209 -2.827356  1.141720
H    6.232086 -3.748841  1.474348
H   -7.311465 -1.948648  0.503364
H   -7.779489 -2.761799 -1.019110
H   -5.881521 -4.371537 -0.758075
H   -6.859117 -4.399396  0.739112
H    2.389321  1.189830 -3.458918
  el energy= -2338.30618026
total energy= -2338.23218955
  zpe= -2337.624480

```

```

th energy= -2337.585084
th enthalpy= -2337.584140
free energy= -2337.695691

```

```

b3lyp-bs1-3a--td-trip--vsing-1001
Ru    0.013696  0.737630  0.014736
O   -1.634919  0.984956  2.822607
O    1.998771  1.260136 -2.514656
H    2.591379  1.390438 -3.268765
N   -0.819050  2.323435  1.175006
N    0.682554  2.425881 -1.061954
N   -1.854189  0.652767 -0.999163
N   -0.925688 -0.944460  0.956411
N    1.029384 -0.828519 -1.035642
N    1.857816  0.684501  1.028133
C   -1.564582  2.230670  2.291143
C   -2.201789  3.312704  2.889687
H   -2.766022  3.179682  3.808526
C   -2.080138  4.578270  2.275225
H   -2.583327  5.439777  2.705630
C   -1.319947  4.712959  1.137122
H   -1.228212  5.681249  0.660120
C   -0.658469  3.581939  0.580357
C    0.185445  3.648493 -0.559553
C    0.559803  4.870509 -1.183818
H    0.186913  5.809550 -0.793049
C    1.415191  4.867526 -2.258584
H    1.707740  5.800168 -2.732904
C    1.930010  3.638846 -2.740478
H    2.606286  3.604035 -3.590006
C    1.544139  2.469355 -2.104698
C   -2.289861  1.469040 -1.961866
H   -1.611981  2.257807 -2.268913
C   -3.555555  1.314654 -2.555101
H   -3.859417  2.001730 -3.339214
C   -4.390958  0.294269 -2.136463
H   -5.371891  0.149925 -2.579125
C   -3.955257 -0.575500 -1.110150
C   -2.667864 -0.355447 -0.565646
C   -2.171072 -1.206090  0.469135
C   -2.968876 -2.269232  0.955650
C   -2.428340 -3.077282  1.982298
H   -3.015383 -3.898193  2.382795
C   -1.157674 -2.802449  2.454197
H   -0.710183 -3.402676  3.241003
C   -0.432375 -1.723719  1.915581
H    0.559237 -1.477510  2.281966
C   -4.751401 -1.661859 -0.611147
C   -4.277551 -2.475773  0.400951
C    0.587673 -1.564897 -2.050753
H   -0.400845 -1.326485 -2.431503
C    1.356293 -2.597514 -2.621534
H    0.946609 -3.168434 -3.449662
C    2.617672 -2.867962 -2.123845
H    3.233628 -3.658020 -2.542537
C    3.111211 -2.093730 -1.047975
C    2.270116 -1.080406 -0.530486

```

|   |           |           |           |
|---|-----------|-----------|-----------|
| C | 2.713699  | -0.274013 | 0.561547  |
| C | 4.003938  | -0.463638 | 1.109834  |
| C | 4.397899  | 0.388517  | 2.167521  |
| H | 5.384585  | 0.273924  | 2.606338  |
| C | 3.518530  | 1.357917  | 2.620323  |
| H | 3.792976  | 2.029247  | 3.428501  |
| C | 2.251628  | 1.482119  | 2.025473  |
| H | 1.537969  | 2.231425  | 2.350653  |
| C | 4.410239  | -2.292364 | -0.467475 |
| C | 4.850781  | -1.489803 | 0.569117  |
| O | -5.006799 | -3.491243 | 0.922342  |
| O | -5.965679 | -1.839636 | -1.183768 |
| C | -6.406613 | -3.446445 | 0.582038  |
| C | -6.575362 | -3.112266 | -0.891627 |
| O | 5.162982  | -3.290805 | -0.987154 |
| O | 6.082002  | -1.616790 | 1.118802  |
| C | 6.300758  | -3.655150 | -0.180798 |
| C | 6.998012  | -2.406124 | 0.334664  |
| H | -6.806639 | -4.435941 | 0.816506  |
| H | -6.899581 | -2.694146 | 1.211435  |
| H | -7.629529 | -3.011476 | -1.161215 |
| H | -6.108766 | -3.880694 | -1.521699 |
| H | 7.368984  | -1.794167 | -0.497795 |
| H | 7.827717  | -2.656579 | 1.000172  |
| H | 5.956973  | -4.281850 | 0.652370  |
| H | 6.956255  | -4.240698 | -0.830086 |
| H | -2.170858 | 1.017268  | 3.627960  |

el energy= -2338.30514704  
 total energy= -2338.23739014  
 zpe= -2337.631054  
 th energy= -2337.592372  
 th enthalpy= -2337.591427  
 free energy= -2337.700172

b3lyp-bs1-3a--gs-triplet

|    |           |           |           |
|----|-----------|-----------|-----------|
| Ru | -0.051374 | 0.651255  | -0.152359 |
| O  | -1.830537 | 1.287529  | 2.894441  |
| O  | 1.689021  | 1.424952  | -2.581725 |
| H  | 2.296894  | 1.503396  | -3.331808 |
| N  | -0.971037 | 2.578813  | 1.257787  |
| N  | 0.530657  | 2.613384  | -1.055162 |
| N  | -1.936388 | 0.499132  | -1.111613 |
| N  | -0.961012 | -0.991611 | 0.908550  |
| N  | 1.242355  | -1.177073 | -1.112792 |
| N  | 1.868641  | 0.634021  | 0.855626  |
| C  | -1.816343 | 2.493546  | 2.284582  |
| C  | -2.621874 | 3.564138  | 2.707298  |
| H  | -3.295048 | 3.456965  | 3.554912  |
| C  | -2.532793 | 4.758169  | 2.004857  |
| H  | -3.150883 | 5.606163  | 2.288543  |
| C  | -1.645273 | 4.862574  | 0.929397  |
| H  | -1.587314 | 5.784297  | 0.362014  |
| C  | -0.866176 | 3.751530  | 0.594072  |
| C  | 0.122566  | 3.798520  | -0.516346 |
| C  | 0.617283  | 5.016060  | -0.988240 |
| H  | 0.322074  | 5.946470  | -0.518004 |
| C  | 1.519552  | 5.027715  | -2.053930 |

|   |           |           |           |
|---|-----------|-----------|-----------|
| H | 1.914622  | 5.967930  | -2.429782 |
| C | 1.905970  | 3.825823  | -2.628671 |
| H | 2.596194  | 3.793006  | -3.468152 |
| C | 1.383979  | 2.641967  | -2.090890 |
| C | -2.394993 | 1.233620  | -2.130272 |
| H | -1.737992 | 2.018862  | -2.490640 |
| C | -3.654168 | 1.014968  | -2.714591 |
| H | -3.970502 | 1.640969  | -3.543851 |
| C | -4.470701 | 0.009543  | -2.227477 |
| H | -5.448238 | -0.184273 | -2.658160 |
| C | -4.016100 | -0.779073 | -1.146521 |
| C | -2.731058 | -0.501805 | -0.619516 |
| C | -2.215467 | -1.285386 | 0.457781  |
| C | -3.000643 | -2.320602 | 1.021209  |
| C | -2.449627 | -3.050488 | 2.098670  |
| H | -3.028191 | -3.846883 | 2.556886  |
| C | -1.178899 | -2.733413 | 2.546187  |
| H | -0.724637 | -3.274729 | 3.371052  |
| C | -0.461512 | -1.697150 | 1.923128  |
| H | 0.538534  | -1.430156 | 2.250778  |
| C | -4.794059 | -1.843243 | -0.575777 |
| C | -4.308742 | -2.579957 | 0.487030  |
| C | 0.918312  | -2.046322 | -2.061869 |
| H | -0.084580 | -1.959579 | -2.476154 |
| C | 1.805741  | -3.037941 | -2.524007 |
| H | 1.489969  | -3.725701 | -3.303481 |
| C | 3.068010  | -3.120488 | -1.966361 |
| H | 3.780361  | -3.874515 | -2.287138 |
| C | 3.436767  | -2.203917 | -0.954155 |
| C | 2.477036  | -1.236258 | -0.556944 |
| C | 2.805010  | -0.289422 | 0.478905  |
| C | 4.090930  | -0.332115 | 1.080135  |
| C | 4.391268  | 0.610962  | 2.088790  |
| H | 5.370917  | 0.597442  | 2.556325  |
| C | 3.426825  | 1.529057  | 2.458281  |
| H | 3.617599  | 2.266114  | 3.232883  |
| C | 2.177032  | 1.508590  | 1.818042  |
| H | 1.395336  | 2.212192  | 2.086015  |
| C | 4.726746  | -2.232362 | -0.324755 |
| C | 5.047599  | -1.314872 | 0.653004  |
| O | -5.023107 | -3.569655 | 1.077708  |
| O | -6.007537 | -2.078445 | -1.134498 |
| C | -6.420005 | -3.576956 | 0.728622  |
| C | -6.587189 | -3.343298 | -0.764743 |
| O | 5.588758  | -3.196036 | -0.735985 |
| O | 6.263753  | -1.283109 | 1.256743  |
| C | 6.713531  | -3.389901 | 0.140554  |
| C | 7.275639  | -2.044884 | 0.574094  |
| H | -6.801531 | -4.556962 | 1.026015  |
| H | -6.933634 | -2.795289 | 1.303780  |
| H | -7.641887 | -3.287249 | -1.045480 |
| H | -6.097875 | -4.140219 | -1.340148 |
| H | 7.626219  | -1.472843 | -0.295296 |
| H | 8.096994  | -2.164690 | 1.285132  |
| H | 6.388686  | -3.973778 | 1.011922  |
| H | 7.447079  | -3.965653 | -0.429498 |
| H | -2.439098 | 1.303336  | 3.647421  |

```

el energy= -2338.25010494
zpe= -2337.643163
th energy= -2337.602919
th enthalpy= -2337.601975
free energy= -2337.718533

b3lyp-bs1-3a--gs-singlet
Ru 0.004656 0.773840 0.008641
O -1.750993 1.168219 2.743628
O 1.925531 1.281198 -2.591676
H 2.508598 1.372794 -3.359555
N -0.801696 2.454411 1.126010
N 0.744275 2.502677 -1.079398
N -1.835265 0.632996 -1.048288
N -0.935240 -0.829440 1.022269
N 0.974855 -0.785956 -1.042092
N 1.845151 0.647870 1.059984
C -1.561814 2.398725 2.234942
C -2.122879 3.532200 2.842575
H -2.733800 3.425393 3.735971
C -1.882899 4.773763 2.278079
H -2.307850 5.672077 2.717775
C -1.081383 4.853693 1.138948
H -0.886230 5.820301 0.692624
C -0.547670 3.686808 0.589805
C 0.337427 3.716020 -0.595627
C 0.744509 4.916647 -1.179501
H 0.424031 5.869136 -0.777463
C 1.586944 4.890367 -2.291237
H 1.914336 5.815740 -2.757475
C 2.001053 3.666231 -2.788778
H 2.658213 3.599781 -3.652795
C 1.558015 2.497340 -2.151328
C -2.265240 1.371780 -2.074409
H -1.593600 2.151037 -2.420841
C -3.511825 1.162342 -2.691000
H -3.804860 1.794098 -3.524557
C -4.341697 0.154596 -2.233486
H -5.306691 -0.037236 -2.692328
C -3.915593 -0.640441 -1.145118
C -2.648101 -0.361358 -0.578314
C -2.162330 -1.146191 0.515239
C -2.954896 -2.195851 1.038969
C -2.433700 -2.938087 2.122987
H -3.017605 -3.748036 2.549139
C -1.182800 -2.611923 2.614276
H -0.745910 -3.161376 3.443265
C -0.462572 -1.549514 2.038605
H 0.513251 -1.265667 2.418926
C -4.704231 -1.713115 -0.606479
C -4.243590 -2.459283 0.460268
C 0.516133 -1.493307 -2.073544
H -0.459279 -1.211528 -2.456777
C 1.246003 -2.546137 -2.655094
H 0.817590 -3.089554 -3.492424
C 2.492610 -2.874583 -2.154683
H 3.079931 -3.682836 -2.579355

```

```

C 3.005476 -2.135893 -1.064153
C 2.202539 -1.097975 -0.533422
C 2.671829 -0.329065 0.578212
C 3.947832 -0.589156 1.134409
C 4.370425 0.211801 2.219802
H 5.346418 0.041786 2.663751
C 3.524089 1.198876 2.692304
H 3.813678 1.833567 3.524831
C 2.267723 1.386889 2.088823
H 1.584046 2.151771 2.443699
C 4.290709 -2.399268 -0.477840
C 4.754669 -1.638873 0.577422
O -4.967493 -3.462064 1.017577
O -5.900501 -1.949190 -1.202197
C -6.354099 -3.472133 0.631020
C -6.482290 -3.221188 -0.863388
O 5.006181 -3.420588 -1.012378
O 5.975243 -1.832105 1.138033
C 6.109629 -3.854346 -0.196145
C 6.859901 -2.649794 0.350702
H -6.738470 -4.457511 0.906278
H -6.887470 -2.699983 1.201134
H -7.529384 -3.167937 -1.171924
H -5.973010 -4.008812 -1.434404
H 7.270245 -2.043689 -0.467874
H 7.669514 -2.952195 1.019702
H 5.723269 -4.475646 0.622626
H 6.745926 -4.462153 -0.844336
H -2.305474 1.222509 3.535846
el energy= -2338.31501806
zpe= -2337.705598
th energy= -2337.666612
th enthalpy= -2337.665667
free energy= -2337.777253

```

```

b3lyp-bs1-3b--td-sing--vsing-1001
Ru 0.031113 0.771058 0.069851
O -1.567760 1.294737 3.038324
O 2.288001 1.480067 -2.304615
N -0.874073 2.424884 1.156380
N 0.701128 2.515399 -0.987040
N -1.803721 0.607713 -1.033620
N -0.907886 -0.861064 1.068038
N 1.010985 -0.694275 -1.035281
N 1.838724 0.645645 1.114355
C -1.601356 2.323801 2.358296
C -2.373267 3.480209 2.792344
H -2.969701 3.347198 3.689781
C -2.322063 4.670276 2.104523
H -2.891503 5.536530 2.435500
C -1.507654 4.755856 0.970012
H -1.438899 5.687515 0.424818
C -0.795092 3.608271 0.534476
C 0.111110 3.676233 -0.631620
C 0.360863 4.896498 -1.282189
H -0.125145 5.810624 -0.968179
C 1.275640 4.921935 -2.350580

```

|   |           |           |           |
|---|-----------|-----------|-----------|
| H | 1.476797  | 5.855929  | -2.872581 |
| C | 1.909972  | 3.761259  | -2.710653 |
| H | 2.636011  | 3.721079  | -3.517641 |
| C | 1.665757  | 2.506199  | -2.009436 |
| C | -2.248696 | 1.333445  | -2.071689 |
| H | -1.583970 | 2.124695  | -2.407075 |
| C | -3.462045 | 1.102805  | -2.712784 |
| H | -3.752397 | 1.724151  | -3.554465 |
| C | -4.288291 | 0.048483  | -2.262001 |
| H | -5.237780 | -0.169147 | -2.739947 |
| C | -3.862349 | -0.724406 | -1.181403 |
| C | -2.604710 | -0.429641 | -0.567318 |
| C | -2.134521 | -1.194092 | 0.516823  |
| C | -2.910808 | -2.274573 | 1.048857  |
| C | -2.415884 | -2.983139 | 2.145186  |
| H | -2.997551 | -3.800196 | 2.561582  |
| C | -1.180808 | -2.615998 | 2.693593  |
| H | -0.766355 | -3.133408 | 3.553199  |
| C | -0.476635 | -1.548210 | 2.120213  |
| H | 0.474844  | -1.228838 | 2.536469  |
| C | -4.624590 | -1.826434 | -0.645747 |
| C | -4.174180 | -2.560884 | 0.422837  |
| C | 0.579380  | -1.335920 | -2.121305 |
| H | -0.401880 | -1.047305 | -2.482916 |
| C | 1.337873  | -2.325976 | -2.767298 |
| H | 0.926538  | -2.816321 | -3.645506 |
| C | 2.588582  | -2.667366 | -2.281014 |
| H | 3.196464  | -3.430366 | -2.756867 |
| C | 3.072324  | -1.995059 | -1.139986 |
| C | 2.245478  | -1.013832 | -0.547860 |
| C | 2.692323  | -0.294625 | 0.603636  |
| C | 3.968702  | -0.550031 | 1.157347  |
| C | 4.367571  | 0.205482  | 2.279820  |
| H | 5.343106  | 0.036297  | 2.724628  |
| C | 3.492130  | 1.153722  | 2.786273  |
| H | 3.758781  | 1.754348  | 3.651854  |
| C | 2.240445  | 1.346120  | 2.180816  |
| H | 1.530038  | 2.072724  | 2.561343  |
| C | 4.358215  | -2.258222 | -0.552534 |
| C | 4.794566  | -1.554871 | 0.546027  |
| O | -4.899427 | -3.600651 | 0.960513  |
| O | -5.822054 | -2.093216 | -1.272931 |
| C | -6.263882 | -3.607602 | 0.555491  |
| C | -6.362122 | -3.368039 | -0.945894 |
| O | 5.111722  | -3.236767 | -1.146903 |
| O | 6.028197  | -1.760299 | 1.111122  |
| C | 6.209959  | -3.677823 | -0.349208 |
| C | 6.924025  | -2.481285 | 0.265800  |
| H | -6.666195 | -4.587738 | 0.832825  |
| H | -6.816837 | -2.823836 | 1.095396  |
| H | -7.403834 | -3.361751 | -1.284099 |
| H | -5.812495 | -4.155490 | -1.484487 |
| H | 7.297394  | -1.816753 | -0.527238 |
| H | 7.760416  | -2.795670 | 0.897891  |
| H | 5.843209  | -4.345686 | 0.444214  |
| H | 6.870646  | -4.239599 | -1.016946 |

el energy= -2337.51543977

total energy= -2337.48070657  
zpe= -2336.902169  
th energy= -2336.863033  
th enthalpy= -2336.862088  
free energy= -2336.974058

b3lyp-bs1-3b--td-sing--vtrip-1001

|    |           |           |           |
|----|-----------|-----------|-----------|
| Ru | -0.010363 | 0.820306  | 0.100896  |
| O  | -0.823953 | 1.450657  | 3.244790  |
| O  | 2.193625  | 1.303981  | -2.351181 |
| N  | -0.710238 | 2.405951  | 1.151758  |
| N  | 0.649417  | 2.444798  | -1.077932 |
| N  | -1.727892 | 0.559606  | -1.060881 |
| N  | -1.009599 | -0.709735 | 1.212646  |
| N  | 0.964742  | -0.778372 | -0.975979 |
| N  | 1.862472  | 0.660222  | 1.112847  |
| C  | -1.202099 | 2.343485  | 2.480499  |
| C  | -2.114734 | 3.397676  | 2.889319  |
| H  | -2.584157 | 3.280974  | 3.861592  |
| C  | -2.273097 | 4.514823  | 2.118543  |
| H  | -2.917246 | 5.328418  | 2.448623  |
| C  | -1.567960 | 4.638443  | 0.893454  |
| H  | -1.654521 | 5.543678  | 0.303540  |
| C  | -0.790845 | 3.584791  | 0.447822  |
| C  | 0.034937  | 3.621835  | -0.780821 |
| C  | 0.211212  | 4.773363  | -1.537281 |
| H  | -0.282719 | 5.700261  | -1.269373 |
| C  | 1.071868  | 4.711221  | -2.655163 |
| H  | 1.217955  | 5.597879  | -3.271349 |
| C  | 1.727782  | 3.544323  | -2.951304 |
| H  | 2.409925  | 3.460839  | -3.792962 |
| C  | 1.567015  | 2.352875  | -2.136061 |
| C  | -2.099673 | 1.222923  | -2.186417 |
| H  | -1.405273 | 1.982325  | -2.530976 |
| C  | -3.266936 | 0.944954  | -2.872088 |
| H  | -3.500746 | 1.503017  | -3.774119 |
| C  | -4.135837 | -0.071985 | -2.399969 |
| H  | -5.054258 | -0.316297 | -2.923223 |
| C  | -3.792751 | -0.761935 | -1.235474 |
| C  | -2.577015 | -0.431184 | -0.565775 |
| C  | -2.193154 | -1.099110 | 0.608461  |
| C  | -3.018372 | -2.119919 | 1.179697  |
| C  | -2.603184 | -2.727948 | 2.366514  |
| H  | -3.217311 | -3.502543 | 2.816202  |
| C  | -1.403796 | -2.314799 | 2.960212  |
| H  | -1.053831 | -2.755767 | 3.888777  |
| C  | -0.654366 | -1.299622 | 2.355202  |
| H  | 0.260000  | -0.935124 | 2.810531  |
| C  | -4.604960 | -1.807337 | -0.661928 |
| C  | -4.239845 | -2.449911 | 0.496844  |
| C  | 0.502687  | -1.464066 | -2.016364 |
| H  | -0.491347 | -1.198934 | -2.359746 |
| C  | 1.249141  | -2.473338 | -2.649067 |
| H  | 0.813542  | -3.005995 | -3.489690 |
| C  | 2.520754  | -2.772696 | -2.193440 |
| H  | 3.125006  | -3.545028 | -2.659036 |
| C  | 3.035803  | -2.048618 | -1.099169 |



|   |           |           |           |
|---|-----------|-----------|-----------|
| C | 2.215266  | -1.055242 | -0.514891 |
| C | 2.692742  | -0.292321 | 0.597060  |
| C | 3.988508  | -0.524467 | 1.117657  |
| C | 4.416068  | 0.261051  | 2.207801  |
| H | 5.407874  | 0.109183  | 2.621986  |
| C | 3.551210  | 1.212245  | 2.725440  |
| H | 3.838781  | 1.832036  | 3.570044  |
| C | 2.280702  | 1.384257  | 2.154180  |
| H | 1.571307  | 2.100488  | 2.550693  |
| C | 4.344724  | -2.277493 | -0.552065 |
| C | 4.807559  | -1.536495 | 0.509632  |
| O | -5.016277 | -3.429012 | 1.071646  |
| O | -5.760376 | -2.114866 | -1.342850 |
| C | -6.352086 | -3.455895 | 0.577536  |
| C | -6.346647 | -3.348845 | -0.942022 |
| O | 5.088941  | -3.264709 | -1.141455 |
| O | 6.060279  | -1.709822 | 1.039518  |
| C | 6.222604  | -3.666014 | -0.371397 |
| C | 6.938567  | -2.441971 | 0.184120  |
| H | -6.788132 | -4.403131 | 0.911651  |
| H | -6.924908 | -2.621417 | 1.009577  |
| H | -7.363346 | -3.356951 | -1.348780 |
| H | -5.778556 | -4.187678 | -1.372628 |
| H | 7.273995  | -1.794383 | -0.639022 |
| H | 7.800316  | -2.725833 | 0.796029  |
| H | 5.894664  | -4.316916 | 0.452383  |
| H | 6.867985  | -4.236006 | -1.046917 |

el energy= -2337.46222189  
 total energy= -2337.47197900  
 zpe= -2336.892958  
 th energy= -2336.854076  
 th enthalpy= -2336.853132  
 free energy= -2336.964529

b3lyp-bs1-3b--td-trip--vsing-1001

|    |           |           |           |
|----|-----------|-----------|-----------|
| Ru | 0.031445  | 0.768416  | 0.096657  |
| O  | -1.231862 | 1.391589  | 3.183540  |
| O  | 2.324651  | 1.439781  | -2.251381 |
| N  | -0.826137 | 2.406976  | 1.161075  |
| N  | 0.682530  | 2.475911  | -1.006999 |
| N  | -1.779562 | 0.591596  | -1.034982 |
| N  | -0.951624 | -0.830702 | 1.126123  |
| N  | 1.003775  | -0.726523 | -0.999259 |
| N  | 1.848265  | 0.640446  | 1.133452  |
| C  | -1.448307 | 2.341554  | 2.425595  |
| C  | -2.302950 | 3.447205  | 2.832094  |
| H  | -2.835141 | 3.325336  | 3.770263  |
| C  | -2.361375 | 4.600134  | 2.083999  |
| H  | -2.974336 | 5.442870  | 2.396573  |
| C  | -1.594328 | 4.684683  | 0.915254  |
| H  | -1.601794 | 5.593609  | 0.327815  |
| C  | -0.833105 | 3.566604  | 0.488627  |
| C  | 0.035779  | 3.628113  | -0.706660 |
| C  | 0.213893  | 4.816409  | -1.420846 |
| H  | -0.317354 | 5.721917  | -1.155927 |
| C  | 1.121410  | 4.818635  | -2.499590 |
| H  | 1.270292  | 5.727822  | -3.080440 |

|   |           |           |           |
|---|-----------|-----------|-----------|
| C | 1.814671  | 3.674514  | -2.798656 |
| H | 2.533619  | 3.629512  | -3.612123 |
| C | 1.648761  | 2.451168  | -2.024648 |
| C | -2.185340 | 1.283697  | -2.112907 |
| H | -1.503370 | 2.056951  | -2.454716 |
| C | -3.379756 | 1.040321  | -2.782807 |
| H | -3.637671 | 1.634672  | -3.653976 |
| C | -4.230908 | 0.009484  | -2.321686 |
| H | -5.167753 | -0.215108 | -2.821002 |
| C | -3.845126 | -0.731417 | -1.205460 |
| C | -2.602937 | -0.428320 | -0.562298 |
| C | -2.167611 | -1.168043 | 0.551187  |
| C | -2.966449 | -2.228200 | 1.090862  |
| C | -2.504639 | -2.915157 | 2.214295  |
| H | -3.103470 | -3.717111 | 2.635544  |
| C | -1.276539 | -2.547381 | 2.782959  |
| H | -0.888277 | -3.048754 | 3.664053  |
| C | -0.550142 | -1.500440 | 2.204172  |
| H | 0.393570  | -1.178237 | 2.635124  |
| C | -4.632352 | -1.810539 | -0.659512 |
| C | -4.217384 | -2.518736 | 0.440488  |
| C | 0.558551  | -1.390789 | -2.064987 |
| H | -0.434067 | -1.122956 | -2.410611 |
| C | 1.320111  | -2.376533 | -2.714828 |
| H | 0.899110  | -2.884773 | -3.578100 |
| C | 2.586530  | -2.687586 | -2.252176 |
| H | 3.198707  | -3.444772 | -2.731834 |
| C | 3.082196  | -1.993019 | -1.129177 |
| C | 2.251337  | -1.018836 | -0.532231 |
| C | 2.706601  | -0.285767 | 0.608347  |
| C | 3.994682  | -0.521765 | 1.142292  |
| C | 4.397922  | 0.237071  | 2.261381  |
| H | 5.383554  | 0.083638  | 2.689380  |
| C | 3.513513  | 1.164389  | 2.787357  |
| H | 3.781418  | 1.764490  | 3.652862  |
| C | 2.249642  | 1.338214  | 2.200810  |
| H | 1.530957  | 2.045254  | 2.600174  |
| C | 4.383813  | -2.229986 | -0.566403 |
| C | 4.828016  | -1.513196 | 0.519902  |
| O | -4.966302 | -3.536384 | 0.987939  |
| O | -5.815110 | -2.084543 | -1.310387 |
| C | -6.319164 | -3.544691 | 0.545761  |
| C | -6.374590 | -3.345927 | -0.963721 |
| O | 5.142103  | -3.199271 | -1.169242 |
| O | 6.074745  | -1.694439 | 1.063449  |
| C | 6.264542  | -3.615113 | -0.391650 |
| C | 6.967622  | -2.402183 | 0.203611  |
| H | -6.736818 | -4.513768 | 0.838794  |
| H | -6.880415 | -2.742267 | 1.048472  |
| H | -7.406599 | -3.340841 | -1.330388 |
| H | -5.817125 | -4.151879 | -1.465529 |
| H | 7.312249  | -1.734204 | -0.599373 |
| H | 7.822061  | -2.697591 | 0.820478  |
| H | 5.926584  | -4.286053 | 0.411886  |
| H | 6.922433  | -4.167313 | -1.070023 |

el energy= -2337.51713421  
 total energy= -2337.48237589

zpe= -2336.903742  
 th energy= -2336.864654  
 th enthalpy= -2336.863710  
 free energy= -2336.974921

b3lyp-bs1-3b--td-trip--vtrip-1001  
 Ru -0.010243 0.820084 0.100917  
 O -0.824094 1.449697 3.244987  
 O 2.194781 1.305345 -2.349762  
 N -0.710933 2.405179 1.152014  
 N 0.649115 2.444992 -1.077329  
 N -1.727599 0.559184 -1.061095  
 N -1.009409 -0.710428 1.212289  
 N 0.965369 -0.778104 -0.976287  
 N 1.862505 0.660260 1.112954  
 C -1.202637 2.342406 2.480765  
 C -2.115688 3.396220 2.889745  
 H -2.584847 3.279355 3.862127  
 C -2.274859 4.513204 2.118922  
 H -2.919441 5.326442 2.449036  
 C -1.570019 4.637121 0.893700  
 H -1.657165 5.542289 0.303758  
 C -0.792264 3.583930 0.448070  
 C 0.033585 3.621533 -0.780477  
 C 0.209112 4.773112 -1.537052  
 H -0.285704 5.699624 -1.269430  
 C 1.070070 4.711508 -2.654735  
 H 1.215513 5.598184 -3.271042  
 C 1.727091 3.545138 -2.950493  
 H 2.409520 3.462078 -3.791960  
 C 1.567102 2.353703 -2.135091  
 C -2.099252 1.222452 -2.186725  
 H -1.404751 1.981742 -2.531325  
 C -3.266536 0.944610 -2.872399  
 H -3.500241 1.502634 -3.774483  
 C -4.135631 -0.072147 -2.400239  
 H -5.054096 -0.316319 -2.923479  
 C -3.792632 -0.762120 -1.235726  
 C -2.576836 -0.431540 -0.566061  
 C -2.193023 -1.099615 0.608109  
 C -3.018338 -2.120344 1.179330  
 C -2.603131 -2.728532 2.366070  
 H -3.217336 -3.503087 2.815725  
 C -1.403655 -2.315613 2.959722  
 H -1.053662 -2.756727 3.888206  
 C -0.654169 -1.300420 2.354772  
 H 0.260187 -0.935953 2.810152  
 C -4.604995 -1.807388 -0.662157  
 C -4.239921 -2.450073 0.496581  
 C 0.503554 -1.463640 -2.016902  
 H -0.490460 -1.198515 -2.360360  
 C 1.250262 -2.472671 -2.649668  
 H 0.814933 -3.005229 -3.490497  
 C 2.521868 -2.771904 -2.193896  
 H 3.126311 -3.544049 -2.659551  
 C 3.036642 -2.047938 -1.099424  
 C 2.215850 -1.054818 -0.515084

C 2.693037 -0.291982 0.597085  
 C 3.988804 -0.523959 1.117752  
 C 4.416099 0.261478 2.208059  
 H 5.407875 0.109736 2.622362  
 C 3.550990 1.212407 2.725773  
 H 3.838384 1.832130 3.570489  
 C 2.280501 1.384243 2.154423  
 H 1.570978 2.100364 2.550900  
 C 4.345559 -2.276644 -0.552213  
 C 4.808126 -1.535722 0.509638  
 O -5.016509 -3.429032 1.071414  
 O -5.760510 -2.114691 -1.343002  
 C -6.352363 -3.455631 0.577411  
 C -6.347026 -3.348551 -0.942136  
 O 5.090034 -3.263610 -1.141703  
 O 6.060833 -1.708885 1.039620  
 C 6.223761 -3.664754 -0.371663  
 C 6.939369 -2.440617 0.184126  
 H -6.788569 -4.402790 0.911538  
 H -6.924977 -2.621050 1.009529  
 H -7.363763 -3.356413 -1.348803  
 H -5.779157 -4.187494 -1.372816  
 H 7.274662 -1.792783 -0.638879  
 H 7.801165 -2.724356 0.796023  
 H 5.895962 -4.315894 0.451986  
 H 6.869325 -4.234453 -1.047255  
 el energy= -2337.46222844  
 total energy= -2337.47197877  
 zpe= -2336.892956  
 th energy= -2336.854074  
 th enthalpy= -2336.853130  
 free energy= -2336.964527

b3lyp-bs1-3b--gs-triplet  
 Ru 0.013240 0.815562 0.101665  
 O -0.939038 1.218900 3.250271  
 O 2.363037 1.631378 -2.101752  
 N -0.852825 2.321518 1.231875  
 N 0.564772 2.509328 -0.951796  
 N -1.773765 0.575228 -1.025407  
 N -0.914946 -0.836171 1.106035  
 N 1.067135 -0.599220 -1.100536  
 N 1.806362 0.603882 1.182188  
 C -1.317392 2.170142 2.549838  
 C -2.232284 3.192793 3.024410  
 H -2.661942 3.036041 4.009890  
 C -2.481119 4.318651 2.285127  
 H -3.145407 5.092657 2.667966  
 C -1.846624 4.504292 1.033902  
 H -1.980495 5.427004 0.480791  
 C -1.033724 3.493374 0.548353  
 C -0.215695 3.608155 -0.680223  
 C -0.173426 4.747388 -1.466168  
 H -0.795488 5.603601 -1.231567  
 C 0.720862 4.790248 -2.563218  
 H 0.749850 5.676442 -3.196167  
 C 1.560892 3.737946 -2.803960

H 2.286927 3.743335 -3.612008  
 C 1.557154 2.556901 -1.955540  
 C -2.192706 1.285935 -2.093434  
 H -1.541170 2.094456 -2.408570  
 C -3.374829 1.009771 -2.768679  
 H -3.651278 1.617078 -3.625649  
 C -4.193695 -0.052309 -2.336833  
 H -5.121921 -0.292761 -2.844688  
 C -3.792541 -0.802369 -1.227778  
 C -2.565525 -0.472057 -0.580129  
 C -2.116605 -1.205574 0.535334  
 C -2.897621 -2.273998 1.071646  
 C -2.427842 -2.940061 2.206861  
 H -3.008429 -3.753189 2.631754  
 C -1.217781 -2.531881 2.780950  
 H -0.825877 -3.015572 3.670549  
 C -0.507389 -1.475366 2.206795  
 H 0.417011 -1.120967 2.647417  
 C -4.556144 -1.902792 -0.695375  
 C -4.135247 -2.597487 0.412675  
 C 0.688961 -1.153666 -2.250891  
 H -0.290921 -0.866562 -2.619426  
 C 1.493271 -2.062674 -2.953637  
 H 1.123692 -2.493576 -3.879684  
 C 2.744985 -2.400927 -2.453392  
 H 3.392195 -3.101446 -2.971878  
 C 3.176512 -1.812429 -1.251886  
 C 2.300428 -0.909842 -0.598365  
 C 2.692116 -0.273272 0.610194  
 C 3.962768 -0.535263 1.182861  
 C 4.304675 0.130977 2.372685  
 H 5.274630 -0.045026 2.827076  
 C 3.381630 1.003395 2.945175  
 H 3.604399 1.525709 3.871093  
 C 2.143510 1.212402 2.327313  
 H 1.383033 1.848167 2.765297  
 C 4.456514 -2.079754 -0.653838  
 C 4.838296 -1.458268 0.511659  
 O -4.864067 -3.627093 0.956374  
 O -5.722441 -2.205277 -1.357071  
 C -6.214860 -3.667514 0.502776  
 C -6.262114 -3.476853 -1.007776  
 O 5.259480 -2.977953 -1.307506  
 O 6.062872 -1.669535 1.092319  
 C 6.355068 -3.445333 -0.521031  
 C 7.006839 -2.281138 0.213545  
 H -6.611652 -4.644674 0.796572  
 H -6.795935 -2.876152 0.999429  
 H -7.290909 -3.491030 -1.382155  
 H -5.685855 -4.272955 -1.503175  
 H 7.373108 -1.536831 -0.508625  
 H 7.838923 -2.618194 0.839532  
 H 5.996162 -4.192665 0.202028  
 H 7.053017 -3.922209 -1.216326  
 el energy= -2337.47148959  
 zpe= -2336.893085  
 th energy= -2336.854039

th enthalpy= -2336.853095  
 free energy= -2336.965032  
 b3lyp-bs1-3b--gs-singlet  
 Ru 0.014258 0.661615 0.052516  
 O -1.185527 1.000352 3.087081  
 O 2.145648 1.274515 -2.407858  
 N -0.781030 2.246273 1.191104  
 N 0.654874 2.369745 -1.024151  
 N -1.762543 0.550914 -1.066986  
 N -1.021540 -0.909139 1.044250  
 N 1.091145 -0.814270 -1.037904  
 N 1.796734 0.562341 1.142648  
 C -1.330088 2.073825 2.470064  
 C -2.043952 3.207274 3.018986  
 H -2.523753 3.056691 3.982552  
 C -2.062478 4.417973 2.371756  
 H -2.582129 5.268715 2.813136  
 C -1.389003 4.576846 1.143577  
 H -1.354106 5.543556 0.655533  
 C -0.755578 3.470408 0.589011  
 C 0.048116 3.538822 -0.656602  
 C 0.201252 4.714118 -1.383322  
 H -0.294105 5.627474 -1.076340  
 C 1.030324 4.695365 -2.523329  
 H 1.157781 5.604940 -3.110875  
 C 1.681695 3.542198 -2.881986  
 H 2.341165 3.492998 -3.744553  
 C 1.538898 2.319859 -2.115719  
 C -2.104923 1.282486 -2.134647  
 H -1.371091 2.011186 -2.462352  
 C -3.333161 1.122910 -2.795643  
 H -3.552204 1.748280 -3.656884  
 C -4.245787 0.182061 -2.346922  
 H -5.203064 0.037682 -2.837840  
 C -3.910005 -0.602104 -1.223443  
 C -2.651438 -0.384995 -0.613574  
 C -2.249873 -1.169203 0.515086  
 C -3.120780 -2.152363 1.043768  
 C -2.681078 -2.890483 2.160752  
 H -3.325345 -3.649419 2.593465  
 C -1.427661 -2.616719 2.683227  
 H -1.053997 -3.154747 3.550132  
 C -0.633411 -1.614094 2.107080  
 H 0.331805 -1.352170 2.524764  
 C -4.777603 -1.609349 -0.676670  
 C -4.402183 -2.347184 0.421687  
 C 0.715146 -1.493887 -2.118752  
 H -0.281501 -1.281943 -2.493929  
 C 1.550081 -2.420293 -2.765116  
 H 1.183712 -2.940198 -3.646316  
 C 2.824435 -2.651788 -2.279525  
 H 3.496528 -3.358253 -2.756334  
 C 3.249316 -1.942098 -1.136617  
 C 2.343295 -1.032513 -0.546344  
 C 2.723786 -0.294484 0.619495  
 C 4.008299 -0.463776 1.185423

```
C      4.327510  0.285751  2.337982
H      5.309270  0.185309  2.790205
C      3.368293  1.133276  2.865485
H      3.570340  1.721209  3.756686
C      2.112186  1.247298  2.245885
H      1.335254  1.892659  2.638331
C      4.550680 -2.103906 -0.548135
C      4.920768 -1.382929  0.562981
O     -5.216086 -3.296577  0.982159
O     -5.981016 -1.787407 -1.310146
C     -6.577530 -3.196580  0.563328
C     -6.644926 -2.997192 -0.945102
O      5.385132 -3.008757 -1.151772
O      6.163408 -1.494183  1.132938
C      6.519310 -3.360933 -0.360041
C      7.121965 -2.115504  0.276813
H     -7.063150 -4.129350  0.866290
H     -7.058957 -2.352388  1.078087
H     -7.678683 -2.898615 -1.290754
H     -6.170423 -3.846624 -1.458474
H      7.433424 -1.405444 -0.503136
H      7.982856 -2.363978  0.905222
H      6.215367 -4.072943  0.421625
H      7.228320 -3.848842 -1.036259
  el energy= -2337.52767577
        zpe= -2336.945606
  th energy= -2336.907038
th enthalpy= -2336.906093
free energy= -2337.016487
```
